# Supplementary material for: Colorectal cancer incidence and mortality: the current status, temporal trends and their attributable risk factors in 60 countries in 2000–2019
Source: PubMed Central journal article supplement — Chin Med J (Engl). 2021 Jul 7;134(16):1941–51. doi: 10.1097/CM9.0000000000001619 (PMC8382382; doi:10.1097/cm9.0000000000001619), 2021-07-07
Supplement: cm9-134-1941-s002.pdf [file cm9-134-1941-s002.pdf]

**Supplementary Table 1: The data sources for the prevalence of risk factors.**

| <b>Risk factors</b> | <b>Measurement</b>                                              | <b>Link</b>                                                                                                                                                       | <b>Year</b> |
|---------------------|-----------------------------------------------------------------|-------------------------------------------------------------------------------------------------------------------------------------------------------------------|-------------|
| Smoking             | Current smoking of any tobacco product (ASR)                    | <a href="https://www.who.int/data/gho/indicator-metadata-registry/imr-details/346">https://www.who.int/data/gho/indicator-metadata-registry/imr-details/346</a>   | 2015        |
| Alcohol             | Total (recorded + unrecorded) per capita (15+) consumption      | <a href="https://www.who.int/data/gho/indicator-metadata-registry/imr-details/4759">https://www.who.int/data/gho/indicator-metadata-registry/imr-details/4759</a> | 2015        |
| UHC                 | UHC service coverage index                                      | <a href="https://www.who.int/data/gho/indicator-metadata-registry/imr-details/4834">https://www.who.int/data/gho/indicator-metadata-registry/imr-details/4834</a> | 2015        |
| High cholesterol    | Raised total cholesterol ( $\geq 6.2$ mmol/L, age-standardized) | <a href="https://www.who.int/data/gho/indicator-metadata-registry/imr-details/2383">https://www.who.int/data/gho/indicator-metadata-registry/imr-details/2383</a> | 2008*       |
| Physical inactivity | Prevalence of insufficient physical activity (ASR)              | <a href="https://www.who.int/data/gho/indicator-metadata-registry/imr-details/2381">https://www.who.int/data/gho/indicator-metadata-registry/imr-details/2381</a> | 2016*       |
| GDP                 | GDP per capita growth (annual %)                                | <a href="https://databank.worldbank.org/source/world-development-indicators">https://databank.worldbank.org/source/world-development-indicators</a>               | 2015        |
| Out-of-pocket       | Out-of-pocket expenditure (% of current health expenditure)     | <a href="https://databank.worldbank.org/source/world-development-indicators">https://databank.worldbank.org/source/world-development-indicators</a>               | 2015        |
| Unemployment        | Unemployment, total (% of the total labor force)                | <a href="https://databank.worldbank.org/source/world-development-indicators">https://databank.worldbank.org/source/world-development-indicators</a>               | 2015        |
| Health expenditure  | Current health expenditure (% of GDP)                           | <a href="https://databank.worldbank.org/source/world-development-indicators">https://databank.worldbank.org/source/world-development-indicators</a>               | 2015        |
| Health system       | Physicians (per 1000 people)                                    | <a href="https://databank.worldbank.org/source/world-development-indicators">https://databank.worldbank.org/source/world-development-indicators</a>               | *           |
| Education           | Gross enrolment ratio, primary (%)                              | <a href="https://databank.worldbank.org/source/world-development-indicators">https://databank.worldbank.org/source/world-development-indicators</a>               | *           |

\*Selected year of these factors were between 2010 and 2019 as they were not available for 2015 in some countries. ASR: Age-standardized rates; GDP: Gross national income; UHC: Universal health coverage.

**Supplementary Table 2: Estimated incidence and mortality of CRC in 2020, worldwide, both sexes, all ages.\***

| Population        | Continent | Incidence |                                 |                          | Mortality |                                 |                          | HDI in 2019 |
|-------------------|-----------|-----------|---------------------------------|--------------------------|-----------|---------------------------------|--------------------------|-------------|
|                   |           | New cases | Crude rate (1/10 <sup>5</sup> ) | ASR (1/10 <sup>5</sup> ) | Deaths    | Crude rate (1/10 <sup>5</sup> ) | ASR (1/10 <sup>5</sup> ) |             |
| Algeria           | Africa    | 6526      | 14.9                            | 15.3                     | 3613      | 8.2                             | 8.3                      | 0.748       |
| Angola            | Africa    | 975       | 3                               | 7.2                      | 670       | 2                               | 5.2                      | 0.581       |
| Benin             | Africa    | 500       | 4.1                             | 7.7                      | 362       | 3                               | 5.7                      | 0.545       |
| Botswana          | Africa    | 81        | 3.4                             | 4.5                      | 47        | 2                               | 2.6                      | 0.735       |
| Burkina Faso      | Africa    | 412       | 2                               | 3.8                      | 324       | 1.5                             | 3.1                      | 0.452       |
| Burundi           | Africa    | 353       | 3                               | 6.9                      | 276       | 2.3                             | 5.6                      | 0.433       |
| Cabo Verde        | Africa    | 41        | 7.4                             | 8.8                      | 17        | 3.1                             | 3.5                      | 0.665       |
| Cameroon          | Africa    | 915       | 3.4                             | 7.1                      | 635       | 2.4                             | 5.2                      | 0.563       |
| Comoros           | Africa    | 20        | 2.3                             | 4.5                      | 13        | 1.5                             | 3                        | 0.554       |
| Republic of Congo | Africa    | 167       | 3                               | 6.3                      | 111       | 2                               | 4.4                      | 0.574       |
| Cyprus            | Africa    | 541       | 44.8                            | 24.3                     | 268       | 22.2                            | 10.7                     | 0.887       |
| Djibouti          | Africa    | 58        | 5.9                             | 6.9                      | 44        | 4.5                             | 5.3                      | 0.524       |
| Egypt             | Africa    | 5231      | 5.1                             | 6.1                      | 2852      | 2.8                             | 3.4                      | 0.707       |
| Equatorial Guinea | Africa    | 52        | 3.7                             | 6.9                      | 35        | 2.5                             | 4.8                      | 0.592       |
| Eritrea           | Africa    | 171       | 4.8                             | 7.5                      | 132       | 3.7                             | 5.8                      | 0.459       |
| Eswatini          | Africa    | 30        | 2.6                             | 4.1                      | 21        | 1.8                             | 3                        | 0.611       |
| Gabon             | Africa    | 113       | 5.1                             | 7.3                      | 67        | 3                               | 4.2                      | 0.703       |
| Ghana             | Africa    | 800       | 2.6                             | 3.9                      | 539       | 1.7                             | 2.8                      | 0.611       |
| Guinea            | Africa    | 202       | 1.5                             | 3.3                      | 154       | 1.2                             | 2.6                      | 0.477       |
| Guinea-Bissau     | Africa    | 45        | 2.3                             | 4.7                      | 35        | 1.8                             | 3.8                      | 0.480       |
| Kenya             | Africa    | 2724      | 5.1                             | 10.5                     | 1862      | 3.5                             | 7.5                      | 0.601       |
| Lesotho           | Africa    | 87        | 4.1                             | 5.3                      | 62        | 2.9                             | 3.8                      | 0.527       |
| Liberia           | Africa    | 131       | 2.6                             | 4.9                      | 101       | 2                               | 3.9                      | 0.480       |
| Libya             | Africa    | 904       | 13.2                            | 15.7                     | 551       | 8                               | 10.2                     | 0.724       |
| Madagascar        | Africa    | 923       | 3.3                             | 6.2                      | 671       | 2.4                             | 4.7                      | 0.528       |

|                             |        |         |      |      |         |      |      |       |
|-----------------------------|--------|---------|------|------|---------|------|------|-------|
| Malawi                      | Africa | 513     | 2.7  | 4.9  | 385     | 2    | 3.9  | 0.483 |
| Mali                        | Africa | 881     | 4.4  | 9.2  | 683     | 3.4  | 7.5  | 0.434 |
| Mauritania                  | Africa | 189     | 4.1  | 7.2  | 137     | 2.9  | 5.4  | 0.546 |
| Mauritius                   | Africa | 372     | 29.3 | 17.8 | 169     | 13.3 | 7.9  | 0.804 |
| Morocco                     | Africa | 4558    | 12.3 | 11.3 | 2499    | 6.8  | 6.2  | 0.686 |
| Mozambique                  | Africa | 625     | 2    | 4.1  | 477     | 1.5  | 3.2  | 0.456 |
| Namibia                     | Africa | 132     | 5.2  | 8.2  | 85      | 3.3  | 5.8  | 0.646 |
| Nigeria                     | Africa | 7478    | 3.6  | 7.3  | 5399    | 2.6  | 5.5  | 0.539 |
| Rwanda                      | Africa | 394     | 3    | 5.3  | 284     | 2.2  | 4    | 0.543 |
| Sao Tome and Principe       | Africa | 8       | 3.7  | 7.6  | 5       | 2.3  | 5    | 0.625 |
| Senegal                     | Africa | 594     | 3.5  | 6.7  | 431     | 2.6  | 5.1  | 0.512 |
| South Africa                | Africa | 7354    | 12.4 | 14.6 | 3728    | 6.3  | 7.5  | 0.709 |
| Sudan                       | Africa | 1735    | 4    | 6.3  | 1036    | 2.4  | 3.9  | 0.510 |
| United Republic of Tanzania | Africa | 2354    | 3.9  | 8.5  | 1671    | 2.8  | 6.3  | 0.529 |
| The Republic of the Gambia  | Africa | 38      | 1.6  | 3.7  | 29      | 1.2  | 3.2  | 0.496 |
| Togo                        | Africa | 351     | 4.2  | 8.2  | 255     | 3.1  | 6.3  | 0.515 |
| Tunisia                     | Africa | 1865    | 15.8 | 12.7 | 965     | 8.2  | 6.4  | 0.740 |
| Uganda                      | Africa | 1185    | 2.6  | 6.7  | 859     | 1.9  | 5    | 0.544 |
| Zambia                      | Africa | 449     | 2.4  | 5.6  | 311     | 1.7  | 4    | 0.584 |
| Zimbabwe                    | Africa | 651     | 4.4  | 8.9  | 459     | 3.1  | 6.4  | 0.571 |
| Armenia                     | Asia   | 1002    | 33.8 | 20.1 | 585     | 19.7 | 11.3 | 0.776 |
| Azerbaijan                  | Asia   | 1643    | 16.2 | 14.2 | 991     | 9.8  | 8.6  | 0.756 |
| Bahrain                     | Asia   | 147     | 8.6  | 13.9 | 65      | 3.8  | 7.1  | 0.852 |
| Bangladesh                  | Asia   | 5664    | 3.4  | 3.8  | 3435    | 2.1  | 2.3  | 0.632 |
| Bhutan                      | Asia   | 28      | 3.6  | 3.8  | 18      | 2.3  | 2.5  | 0.654 |
| Brunei Darussalam           | Asia   | 151     | 34.5 | 34.9 | 57      | 13   | 14.6 | 0.838 |
| Cambodia                    | Asia   | 1590    | 9.5  | 12.3 | 925     | 5.5  | 7.4  | 0.594 |
| China                       | Asia   | 555,477 | 38.4 | 23.9 | 286,162 | 19.8 | 12   | 0.761 |
| Georgia                     | Asia   | 1162    | 29.1 | 15.6 | 654     | 16.4 | 8.3  | 0.812 |

|                                  |      |         |       |      |        |      |      |       |
|----------------------------------|------|---------|-------|------|--------|------|------|-------|
| India                            | Asia | 65,358  | 4.7   | 4.8  | 38,161 | 2.8  | 2.8  | 0.645 |
| Indonesia                        | Asia | 34,189  | 12.5  | 12.4 | 18,152 | 6.6  | 6.7  | 0.718 |
| Islamic Republic of Iran         | Asia | 11,942  | 14.2  | 13.9 | 6220   | 7.4  | 7.3  | 0.783 |
| Iraq                             | Asia | 2096    | 5.2   | 8.7  | 1283   | 3.2  | 5.4  | 0.674 |
| Israel                           | Asia | 2882    | 33.3  | 21.9 | 1385   | 16   | 9    | 0.919 |
| Japan                            | Asia | 148,505 | 117.4 | 38.5 | 59,912 | 47.4 | 11.6 | 0.919 |
| Jordan                           | Asia | 1260    | 12.3  | 17.7 | 668    | 6.5  | 9.6  | 0.729 |
| Kazakhstan                       | Asia | 3337    | 17.8  | 15.6 | 1973   | 10.5 | 9.2  | 0.825 |
| Republic of Korea                | Asia | 28,941  | 56.4  | 27.2 | 9888   | 19.3 | 7.8  | 0.916 |
| Kuwait                           | Asia | 411     | 9.6   | 12.5 | 188    | 4.4  | 6.6  | 0.806 |
| Kyrgyzstan                       | Asia | 402     | 6.2   | 7.8  | 274    | 4.2  | 5.4  | 0.697 |
| Lao People's Democratic Republic | Asia | 779     | 10.7  | 15   | 440    | 6    | 8.9  | 0.613 |
| Lebanon                          | Asia | 906     | 13.3  | 12.2 | 511    | 7.5  | 6.7  | 0.744 |
| Malaysia                         | Asia | 6597    | 20.4  | 19.6 | 3462   | 10.7 | 10.2 | 0.81  |
| Maldives                         | Asia | 48      | 8.9   | 13   | 24     | 4.4  | 7.4  | 0.74  |
| Mongolia                         | Asia | 160     | 4.9   | 6.3  | 100    | 3.1  | 4    | 0.737 |
| Myanmar                          | Asia | 5162    | 9.5   | 9.7  | 3007   | 5.5  | 5.8  | 0.583 |
| Nepal                            | Asia | 1090    | 3.7   | 4.3  | 633    | 2.2  | 2.5  | 0.602 |
| Oman                             | Asia | 385     | 7.5   | 9.9  | 213    | 4.2  | 5.7  | 0.813 |
| Pakistan                         | Asia | 8602    | 3.9   | 5.3  | 4813   | 2.2  | 3    | 0.557 |
| Philippines                      | Asia | 17,364  | 15.8  | 18.8 | 9183   | 8.4  | 10.1 | 0.718 |
| Qatar                            | Asia | 174     | 6     | 15.7 | 80     | 2.8  | 9    | 0.848 |
| Saudi Arabia                     | Asia | 4007    | 11.5  | 13.9 | 1996   | 5.7  | 7.3  | 0.854 |
| Singapore                        | Asia | 3558    | 60.8  | 33   | 1808   | 30.9 | 16.2 | 0.938 |
| Sri Lanka                        | Asia | 2302    | 10.8  | 7.8  | 1122   | 5.2  | 3.7  | 0.782 |
| Syrian Arab Republic             | Asia | 1761    | 10.1  | 12.9 | 1106   | 6.3  | 8.2  | 0.567 |
| Tajikistan                       | Asia | 291     | 3.1   | 4.7  | 186    | 2    | 3.2  | 0.668 |
| Thailand                         | Asia | 21,103  | 30.2  | 16.9 | 11,464 | 16.4 | 8.4  | 0.777 |
| Timor-Leste                      | Asia | 76      | 5.8   | 8.9  | 42     | 3.2  | 5    | 0.606 |
| Turkey                           | Asia | 21,191  | 25.1  | 20.6 | 10,798 | 12.8 | 10.1 | 0.820 |

|                        |        |        |       |      |        |      |      |       |
|------------------------|--------|--------|-------|------|--------|------|------|-------|
| Turkmenistan           | Asia   | 317    | 5.3   | 6.2  | 188    | 3.1  | 3.8  | 0.715 |
| United Arab Emirates   | Asia   | 510    | 5.2   | 13.1 | 218    | 2.2  | 6.9  | 0.890 |
| Uzbekistan             | Asia   | 2522   | 7.5   | 8.9  | 1456   | 4.4  | 5.2  | 0.720 |
| Viet Nam               | Asia   | 16,426 | 16.9  | 14.1 | 8524   | 8.8  | 7    | 0.704 |
| Yemen                  | Asia   | 1512   | 5.1   | 10.7 | 1063   | 3.6  | 7.7  | 0.470 |
| Albania                | Europe | 387    | 13.4  | 7.7  | 212    | 7.4  | 3.8  | 0.795 |
| Austria                | Europe | 4499   | 50    | 21   | 2299   | 25.5 | 8.7  | 0.922 |
| Belarus                | Europe | 5516   | 58.4  | 30.2 | 2783   | 29.5 | 14.1 | 0.823 |
| Belgium                | Europe | 9585   | 82.7  | 35.3 | 3349   | 28.9 | 10   | 0.931 |
| Bosnia and Herzegovina | Europe | 1865   | 56.8  | 27   | 1106   | 33.7 | 14.5 | 0.780 |
| Bulgaria               | Europe | 4648   | 66.9  | 27.4 | 2768   | 39.8 | 14.7 | 0.816 |
| Croatia                | Europe | 3706   | 90.3  | 36.3 | 2320   | 56.5 | 19.6 | 0.851 |
| Czechia                | Europe | 8534   | 79.7  | 33.7 | 3443   | 32.2 | 12.3 | 0.900 |
| Denmark                | Europe | 5769   | 99.6  | 40.9 | 1986   | 34.3 | 11.8 | 0.940 |
| Estonia                | Europe | 960    | 72.4  | 28.3 | 557    | 42   | 13.8 | 0.892 |
| Ethiopia               | Europe | 6048   | 5.3   | 8.9  | 4566   | 4    | 6.8  | 0.485 |
| Finland                | Europe | 3780   | 68.2  | 25.7 | 1489   | 26.9 | 8.8  | 0.938 |
| France                 | Europe | 48,061 | 73.6  | 30.1 | 20,953 | 32.1 | 10.4 | 0.901 |
| Germany                | Europe | 57,528 | 68.7  | 25.8 | 27,077 | 32.3 | 9.9  | 0.947 |
| Greece                 | Europe | 7895   | 75.7  | 26.9 | 3970   | 38.1 | 10.7 | 0.888 |
| Hungary                | Europe | 9793   | 101.4 | 45.3 | 4880   | 50.5 | 20.2 | 0.854 |
| Iceland                | Europe | 194    | 56.8  | 28.5 | 71     | 20.8 | 9.5  | 0.949 |
| Ireland                | Europe | 3178   | 64.4  | 34.9 | 1282   | 26   | 12.4 | 0.955 |
| Italy                  | Europe | 48,576 | 80.3  | 29.3 | 21,789 | 36   | 10.1 | 0.892 |
| Latvia                 | Europe | 1745   | 92.5  | 36.8 | 681    | 36.1 | 12.3 | 0.866 |
| Lithuania              | Europe | 1892   | 69.5  | 27.6 | 902    | 33.1 | 11.7 | 0.882 |
| Luxembourg             | Europe | 330    | 52.7  | 26.3 | 125    | 20   | 8.7  | 0.916 |
| Malta                  | Europe | 289    | 65.5  | 25.7 | 127    | 28.8 | 10.1 | 0.895 |
| Norway                 | Europe | 4976   | 91.8  | 41.9 | 1862   | 34.3 | 13.5 | 0.957 |
| Poland                 | Europe | 25,597 | 67.6  | 30.5 | 15,088 | 39.9 | 16.1 | 0.880 |
| Portugal               | Europe | 10,501 | 103   | 39.4 | 4320   | 42.4 | 13   | 0.864 |

|                     |                  |        |      |      |        |      |      |       |
|---------------------|------------------|--------|------|------|--------|------|------|-------|
| Republic of Moldova | Europe           | 1991   | 49.4 | 30   | 1187   | 29.4 | 17.6 | 0.750 |
| Romania             | Europe           | 12,938 | 67.3 | 30.9 | 6903   | 35.9 | 14.8 | 0.828 |
| Russian Federation  | Europe           | 77,213 | 52.9 | 27.8 | 42,079 | 28.8 | 13.9 | 0.824 |
| Serbia              | Europe           | 5989   | 68.5 | 33.6 | 3356   | 38.4 | 16.7 | 0.806 |
| Sierra Leone        | Europe           | 222    | 2.8  | 5    | 174    | 2.2  | 4.1  | 0.452 |
| Slovakia            | Europe           | 4821   | 88.3 | 43.9 | 2584   | 47.3 | 21   | 0.860 |
| Slovenia            | Europe           | 2018   | 97.1 | 39.6 | 736    | 35.4 | 11.7 | 0.917 |
| Spain               | Europe           | 40,441 | 86.5 | 35.8 | 16,470 | 35.2 | 11.5 | 0.904 |
| Sweden              | Europe           | 6779   | 67.1 | 27.8 | 3160   | 31.3 | 10.8 | 0.945 |
| Switzerland         | Europe           | 4569   | 52.8 | 22.3 | 1861   | 21.5 | 7.5  | 0.955 |
| The Netherlands     | Europe           | 17,015 | 99.3 | 41   | 6579   | 38.4 | 13.5 | 0.944 |
| Ukraine             | Europe           | 21,899 | 50.1 | 25.5 | 11,669 | 26.7 | 12.9 | 0.779 |
| United Kingdom      | Europe           | 52,128 | 76.8 | 34.1 | 21,682 | 31.9 | 11.4 | 0.932 |
| Bahamas             | Northern America | 73     | 18.6 | 16   | 49     | 12.5 | 10.7 | 0.814 |
| Barbados            | Northern America | 147    | 51.2 | 25.1 | 101    | 35.1 | 16.1 | 0.814 |
| Belize              | Northern America | 20     | 5    | 6.2  | 19     | 4.8  | 6    | 0.716 |
| Canada              | Northern America | 25,510 | 67.6 | 31.2 | 9523   | 25.2 | 9.9  | 0.929 |
| Costa Rica          | Northern America | 1257   | 24.7 | 17.2 | 726    | 14.3 | 9.5  | 0.810 |
| Cuba                | Northern America | 4867   | 43   | 20.1 | 3002   | 26.5 | 11.3 | 0.783 |
| Dominican Republic  | Northern America | 1512   | 13.9 | 12.9 | 924    | 8.5  | 7.5  | 0.756 |
| El Salvador         | Northern America | 639    | 9.9  | 8.5  | 352    | 5.4  | 4.5  | 0.673 |
| Guatemala           | Northern America | 769    | 4.3  | 5.7  | 495    | 2.8  | 3.6  | 0.663 |
| Haiti               | Northern America | 1109   | 9.7  | 12.5 | 773    | 6.8  | 8.7  | 0.510 |
| Honduras            | Northern America | 609    | 6.1  | 8    | 347    | 3.5  | 4.2  | 0.634 |
| Jamaica             | Northern America | 796    | 26.9 | 21.1 | 512    | 17.3 | 13.4 | 0.734 |
| Mexico              | Northern America | 14,901 | 11.6 | 10.6 | 7755   | 6    | 5.4  | 0.779 |
| Montenegro          | Northern America | 330    | 52.5 | 27.4 | 186    | 29.6 | 13.7 | 0.829 |
| Nicaragua           | Northern America | 614    | 9.3  | 10.5 | 347    | 5.2  | 6    | 0.660 |
| Panama              | Northern America | 726    | 16.8 | 13.9 | 398    | 9.2  | 7.3  | 0.815 |
| Saint Lucia         | Northern America | 35     | 19.1 | 12.8 | 21     | 11.4 | 7.4  | 0.759 |
| Samoa               | Northern America | 39     | 19.7 | 24.8 | 21     | 10.6 | 14.2 | 0.715 |

|                                  |                  |         |      |      |        |      |      |       |
|----------------------------------|------------------|---------|------|------|--------|------|------|-------|
| Trinidad and Tobago              | Northern America | 396     | 28.3 | 18.5 | 246    | 17.6 | 11   | 0.796 |
| United States of America         | Northern America | 155,008 | 46.8 | 25.6 | 54,443 | 16.4 | 8    | 0.926 |
| Argentina                        | Southern America | 15,895  | 35.2 | 25.1 | 8756   | 19.4 | 12.6 | 0.845 |
| Plurinational State of Bolivia   | Southern America | 627     | 5.4  | 5.7  | 387    | 3.3  | 3.4  | 0.718 |
| Brazil                           | Southern America | 55,102  | 25.9 | 19.4 | 26,170 | 12.3 | 9    | 0.765 |
| Chile                            | Southern America | 6219    | 32.5 | 19.9 | 3179   | 16.6 | 9.4  | 0.851 |
| Colombia                         | Southern America | 10,783  | 21.2 | 16.9 | 5417   | 10.6 | 8.2  | 0.767 |
| Ecuador                          | Southern America | 2481    | 14.1 | 12.9 | 1283   | 7.3  | 6.4  | 0.759 |
| Guyana                           | Southern America | 71      | 9    | 8.5  | 43     | 5.5  | 5    | 0.682 |
| Paraguay                         | Southern America | 1257    | 17.6 | 18.6 | 650    | 9.1  | 9.3  | 0.728 |
| Peru                             | Southern America | 4636    | 14.1 | 11.4 | 2365   | 7.2  | 5.6  | 0.777 |
| Suriname                         | Southern America | 115     | 19.6 | 18.1 | 73     | 12.4 | 11.3 | 0.738 |
| Uruguay                          | Southern America | 2123    | 61.1 | 32   | 1080   | 31.1 | 14.3 | 0.817 |
| Bolivarian Republic of Venezuela | Southern America | 4602    | 16.2 | 14.2 | 2589   | 9.1  | 7.8  | 0.711 |
| Australia                        | Oceania          | 16,240  | 63.7 | 33.1 | 5603   | 22   | 8.9  | 0.944 |
| Fiji                             | Oceania          | 85      | 9.5  | 10.9 | 49     | 5.5  | 6.8  | 0.743 |
| New Zealand                      | Oceania          | 3404    | 70.6 | 33.8 | 1435   | 29.8 | 12.3 | 0.931 |
| North Macedonia                  | Oceania          | 948     | 45.5 | 26.1 | 503    | 24.1 | 13   | 0.774 |
| Papua New Guinea                 | Oceania          | 596     | 6.7  | 11.3 | 346    | 3.9  | 6.9  | 0.555 |
| Solomon Islands                  | Oceania          | 27      | 3.9  | 6.7  | 16     | 2.3  | 4.2  | 0.567 |
| Vanuatu                          | Oceania          | 10      | 3.3  | 5.2  | 9      | 2.9  | 4.8  | 0.609 |

\*Data are all from GLOBOCAN 2020 (<https://gco.iarc.fr/today/home>). ASR: Age-standardized rates; CRC: Colorectal cancer; HDI: Human development index.

**Supplementary Table 3: Joinpoint analysis for CRC, age-standardized incidence in 2000–2019 for both genders, all ages.**

| Country             | Trend 1   |       |                | Trend 2   |       |                | Trend 3   |       |                | Trend 4   |       |               | Year      | AAPC Range |                |
|---------------------|-----------|-------|----------------|-----------|-------|----------------|-----------|-------|----------------|-----------|-------|---------------|-----------|------------|----------------|
|                     | Year      | EAPC  | Range          | Year      | EAPC  | Range          | Year      | EAPC  | Range          | Year      | EAPC  | Range         |           |            |                |
| Antigua and Barbuda | 2000-2004 | 0.09  | -1.64 to 1.84  | 2004-2007 | 5.00  | -0.20 to 10.48 | 2007-2019 | 0.99  | 0.74 to 1.24   | NA        | NA    | NA            | 2000-2019 | 1.42       | 0.61 to 2.24   |
| Argenti             | 2000-2014 | 0.22  | 0.01 to 0.43   | 2014-2019 | 1.91  | 1.00 to 2.82   | NA        | NA    | NA             | NA        | NA    | NA            | 2000-2019 | 0.66       | 0.40 to 0.92   |
| Australia           | 2000-2009 | -0.71 | -1.14 to -0.28 | 2009-2012 | -3.21 | -7.47 to 1.25  | 2012-2019 | 0.19  | -0.39 to 0.77  | NA        | NA    | NA            | 2000-2019 | -0.78      | -1.46 to -0.09 |
| Austria             | 2000-2008 | -3.53 | -3.92 to -3.13 | 2008-2019 | -1.20 | -1.46 to -0.94 | NA        | NA    | NA             | NA        | NA    | NA            | 2000-2019 | -2.19      | -2.39 to -1.98 |
| Barbados            | 2000-2004 | 4.65  | 3.41 to 5.91   | 2004-2013 | 0.63  | 0.28 to 0.99   | 2013-2017 | -0.10 | -1.55 to 1.37  | 2017-2019 | 2.65  | -0.13 to 5.50 | 2000-2019 | 1.52       | 1.07 to 1.98   |
| Belgium             | 2000-2019 | -0.46 | -0.57 to -0.34 | NA        | NA    | NA             | NA        | NA    | NA             | NA        | NA    | NA            | 2000-2019 | -0.46      | -0.57 to -0.34 |
| Brazil              | 2000-2003 | 2.41  | 1.15 to 3.68   | 2003-2011 | 0.87  | 0.58 to 1.16   | 2011-2019 | 0.01  | -0.19 to 0.21  | NA        | NA    | NA            | 2000-2019 | 0.75       | 0.53 to 0.97   |
| Cada                | 2000-2008 | 0.41  | 0.01 to 0.80   | 2008-2013 | -1.20 | -2.21 to -0.17 | 2013-2019 | 0.64  | 0.11 to 1.16   | NA        | NA    | NA            | 2000-2019 | 0.05       | -0.27 to 0.38  |
| Chile               | 2000-2008 | 1.98  | 1.46 to 2.50   | 2008-2013 | 3.82  | 2.57 to 5.08   | 2013-2019 | 0.54  | -0.03 to 1.10  | NA        | NA    | NA            | 2000-2019 | 2.00       | 1.61 to 2.39   |
| Chi                 | 2000-2004 | 7.76  | 6.93 to 8.59   | 2004-2011 | 4.20  | 3.87 to 4.53   | 2011-2016 | 0.33  | -0.18 to 0.84  | 2016-2019 | 3.68  | 2.93 to 4.43  | 2000-2019 | 3.82       | 3.58 to 4.06   |
| Colombia            | 2000-2019 | 1.08  | 0.90 to 1.27   | NA        | NA    | NA             | NA        | NA    | NA             | NA        | NA    | NA            | 2000-2019 | 1.08       | 0.90 to 1.27   |
| Costa Rica          | 2000-2019 | 2.64  | 2.34 to 2.95   | NA        | NA    | NA             | NA        | NA    | NA             | NA        | NA    | NA            | 2000-2019 | 2.64       | 2.34 to 2.95   |
| Croatia             | 2000-2010 | 2.95  | 2.33 to 3.58   | 2010-2019 | -0.01 | -0.64 to 0.64  | NA        | NA    | NA             | NA        | NA    | NA            | 2000-2019 | 1.54       | 1.13 to 1.95   |
| Cuba                | 2000-2012 | 1.12  | 0.71 to 1.53   | 2012-2019 | 2.71  | 1.93 to 3.49   | NA        | NA    | NA             | NA        | NA    | NA            | 2000-2019 | 1.70       | 1.35 to 2.06   |
| Denmark             | 2000-2009 | 0.86  | 0.48 to 1.25   | 2009-2014 | -1.83 | -3.04 to -0.61 | 2014-2019 | 0.51  | -0.35 to 1.39  | NA        | NA    | NA            | 2000-2019 | 0.06       | -0.34 to 0.45  |
| Ecuador             | 2000-2006 | 6.27  | 4.98 to 7.58   | 2006-2019 | 1.56  | 1.28 to 1.83   | NA        | NA    | NA             | NA        | NA    | NA            | 2000-2019 | 3.02       | 2.62 to 3.43   |
| Estonia             | 2000-2007 | 3.20  | 2.44 to 3.96   | 2007-2019 | 0.37  | 0.08 to 0.67   | NA        | NA    | NA             | NA        | NA    | NA            | 2000-2019 | 1.40       | 1.10 to 1.71   |
| Fiji                | 2000-2002 | -2.81 | -5.43 to -0.12 | 2002-2012 | 2.34  | 2.12 to 2.57   | 2012-2019 | 1.24  | 0.98 to 1.50   | NA        | NA    | NA            | 2000-2019 | 1.38       | 1.09 to 1.68   |
| Finland             | 2000-2019 | 0.48  | 0.36 to 0.60   | NA        | NA    | NA             | NA        | NA    | NA             | NA        | NA    | NA            | 2000-2019 | 0.48       | 0.36 to 0.60   |
| France              | 2000-2019 | -0.44 | -0.57 to -0.32 | NA        | NA    | NA             | NA        | NA    | NA             | NA        | NA    | NA            | 2000-2019 | -0.44      | -0.57 to -0.32 |
| Germany             | 2000-2003 | 0.70  | -1.11 to 2.54  | 2003-2008 | -2.62 | -3.74 to -1.49 | 2008-2014 | -4.05 | -4.91 to -3.18 | 2014-2019 | 1.35  | 0.41 to 2.30  | 2000-2019 | -1.53      | -2.01 to -1.05 |
| Greece              | 2000-2019 | 0.09  | -0.03 to 0.21  | NA        | NA    | NA             | NA        | NA    | NA             | NA        | NA    | NA            | 2000-2019 | 0.09       | -0.03 to 0.21  |
| Greda               | 2000-2010 | 1.71  | 1.44 to 1.97   | 2010-2014 | 0.59  | -0.85 to 2.05  | 2014-2017 | 4.91  | 2.13 to 7.76   | 2017-2019 | -0.16 | -2.64 to      | 2000-2019 | 1.77       | 1.24 to 2.30   |



|             |           |       |                |           |       |                |           |       |                 |           |       |               |           |       |                |
|-------------|-----------|-------|----------------|-----------|-------|----------------|-----------|-------|-----------------|-----------|-------|---------------|-----------|-------|----------------|
|             |           |       |                |           |       |                |           |       |                 |           |       | 2.38          |           |       |                |
| Guatemala   | 2000-2005 | 3.61  | 2.82 to 4.40   | 2005-2008 | 0.39  | -2.48 to 3.35  | 2008-2011 | 3.54  | 0.79 to 6.36    | 2011-2019 | 0.20  | -0.05 to 0.46 | 2000-2019 | 1.64  | 1.06 to 2.23   |
| Guya        | 2000-2006 | -1.54 | -1.91 to -1.16 | 2006-2009 | -0.34 | -2.51 to 1.88  | 2009-2019 | 1.58  | 1.42 to 1.73    | NA        | NA    | NA            | 2000-2019 | 0.28  | -0.06 to 0.62  |
| Hungary     | 2000-2007 | 0.64  | 0.12 to 1.16   | 2007-2013 | -1.00 | -1.83 to -0.16 | 2013-2019 | 0.51  | -0.12 to 1.14   | NA        | NA    | NA            | 2000-2019 | 0.08  | -0.27 to 0.42  |
| Iceland     | 2000-2002 | 1.62  | -0.74 to 4.03  | 2002-2017 | -1.22 | -1.32 to -1.12 | 2017-2019 | 0.71  | -1.31 to 2.78   | NA        | NA    | NA            | 2000-2019 | -0.72 | -1.02 to -0.42 |
| Israel      | 2000-2007 | -1.14 | -1.52 to -0.75 | 2007-2015 | -2.60 | -2.96 to -2.23 | 2015-2019 | 1.27  | 0.43 to 2.12    | NA        | NA    | NA            | 2000-2019 | -1.25 | -1.50 to -1.01 |
| Italy       | 2000-2003 | 2.92  | 0.66 to 5.24   | 2003-2019 | -1.04 | -1.20 to -0.88 | NA        | NA    | NA              | NA        | NA    | NA            | 2000-2019 | -0.42 | -0.77 to -0.08 |
| Japan       | 2000-2014 | 0.36  | 0.21 to 0.51   | 2014-2019 | -0.67 | -1.37 to 0.02  | NA        | NA    | NA              | NA        | NA    | NA            | 2000-2019 | 0.09  | -0.11 to 0.28  |
| Kuwait      | 2000-2004 | 0.32  | -1.59 to 2.27  | 2004-2008 | 8.54  | 5.72 to 11.43  | 2008-2011 | -5.79 | -10.00 to -1.38 | 2011-2019 | 1.82  | 1.40 to 2.25  | 2000-2019 | 1.62  | 0.74 to 2.52   |
| Kyrgyzstan  | 2000-2006 | -0.13 | -0.67 to 0.42  | 2006-2009 | -2.31 | -5.47 to 0.96  | 2009-2019 | 0.10  | -0.14 to 0.33   | NA        | NA    | NA            | 2000-2019 | -0.36 | -0.86 to 0.15  |
| Latvia      | 2000-2007 | 3.03  | 2.24 to 3.84   | 2007-2019 | -0.72 | -1.05 to -0.38 | NA        | NA    | NA              | NA        | NA    | NA            | 2000-2019 | 0.65  | 0.32 to 0.98   |
| Lithuania   | 2000-2008 | 1.93  | 1.05 to 2.82   | 2008-2019 | -0.86 | -1.39 to -0.33 | NA        | NA    | NA              | NA        | NA    | NA            | 2000-2019 | 0.31  | -0.13 to 0.75  |
| Luxembourg  | 2000-2005 | 0.43  | -0.10 to 0.96  | 2005-2013 | -1.99 | -2.29 to -1.69 | 2013-2016 | -5.34 | -7.51 to -3.13  | 2016-2019 | -0.07 | -1.20 to 1.08 | 2000-2019 | -1.60 | -1.98 to -1.21 |
| Malta       | 2000-2002 | 2.48  | 0.82 to 4.18   | 2002-2008 | 0.19  | -0.15 to 0.54  | 2008-2015 | -0.70 | -0.94 to -0.46  | 2015-2019 | 0.87  | 0.44 to 1.31  | 2000-2019 | 0.24  | 0.04 to 0.45   |
| Mauritius   | 2000-2005 | 3.11  | 2.00 to 4.24   | 2005-2012 | 0.53  | -0.18 to 1.23  | 2012-2019 | 2.12  | 1.64 to 2.59    | NA        | NA    | NA            | 2000-2019 | 1.79  | 1.40 to 2.17   |
| Mexico      | 2000-2011 | 1.93  | 1.61 to 2.25   | 2011-2019 | 2.75  | 2.36 to 3.15   | NA        | NA    | NA              | NA        | NA    | NA            | 2000-2019 | 2.28  | 2.05 to 2.51   |
| Netherlands | 2000-2003 | -0.70 | -2.72 to 1.36  | 2003-2009 | 2.36  | 1.50 to 3.23   | 2009-2019 | -0.17 | -0.43 to 0.10   | NA        | NA    | NA            | 2000-2019 | 0.54  | 0.14 to 0.94   |
| New Zealand | 2000-2014 | -0.92 | -1.14 to -0.71 | 2014-2019 | 1.02  | 0.09 to 1.97   | NA        | NA    | NA              | NA        | NA    | NA            | 2000-2019 | -0.42 | -0.68 to -0.15 |
| Norway      | 2000-2011 | 0.82  | 0.57 to 1.08   | 2011-2019 | -1.69 | -2.06 to -1.32 | NA        | NA    | NA              | NA        | NA    | NA            | 2000-2019 | -0.24 | -0.44 to -0.05 |
| Pama        | 2000-2003 | 2.68  | 0.46 to 4.94   | 2003-2007 | 0.32  | -1.64 to 2.32  | 2007-2019 | 1.93  | 1.73 to 2.12    | NA        | NA    | NA            | 2000-2019 | 1.70  | 1.20 to 2.21   |
| Philippines | 2000-2006 | -0.65 | -0.96 to -0.33 | 2006-2010 | 2.36  | 1.50 to 3.23   | 2010-2013 | 3.77  | 2.22 to 5.35    | 2013-2019 | 1.27  | 1.05 to 1.50  | 2000-2019 | 1.28  | 1.00 to 1.56   |
| Poland      | 2000-2009 | 1.16  | 0.93 to 1.38   | 2009-2019 | 0.20  | 0.03 to 0.37   | NA        | NA    | NA              | NA        | NA    | NA            | 2000-2019 | 0.65  | 0.53 to 0.78   |
| Puerto Rico | 2000-2008 | 1.94  | 1.02 to 2.87   | 2008-2019 | 0.09  | -0.40 to 0.59  | NA        | NA    | NA              | NA        | NA    | NA            | 2000-2019 | 0.87  | 0.43 to 1.31   |
| Republic of | 2000-2004 | 4.86  | 4.01 to 5.72   | 2004-2010 | 3.08  | 2.59 to 3.56   | 2010-2016 | -2.41 | -2.82 to -2.00  | 2016-2019 | 1.24  | 0.37 to       | 2000-2019 | 1.39  | 1.13 to 1.65   |

|                          |           |       |                |           |       |                |           |       |                |           |       |                |           |       |                |
|--------------------------|-----------|-------|----------------|-----------|-------|----------------|-----------|-------|----------------|-----------|-------|----------------|-----------|-------|----------------|
| Korea                    |           |       |                |           |       |                |           |       |                |           |       |                | 2.12      |       |                |
| Republic of Moldova      | 2000-2009 | 5.56  | 4.75 to 6.38   | 2009-2012 | -1.18 | -8.16 to 6.32  | 2012-2015 | 4.39  | -2.87 to 12.19 | 2015-2019 | -3.37 | -5.46 to -1.23 | 2000-2019 | 2.36  | 0.84 to 3.90   |
| Romania                  | 2000-2019 | 2.47  | 2.28 to 2.65   | NA        | NA    | NA             | NA        | NA    | NA             | NA        | NA    | NA             | 2000-2019 | 2.47  | 2.28 to 2.65   |
| Saint Lucia              | 2000-2011 | -0.24 | -0.51 to 0.03  | 2011-2019 | 3.05  | 2.70 to 3.41   | NA        | NA    | NA             | NA        | NA    | NA             | 2000-2019 | 1.13  | 0.94 to 1.33   |
| Serbia                   | 2000-2009 | 2.95  | 2.56 to 3.34   | 2009-2019 | 0.42  | 0.13 to 0.71   | NA        | NA    | NA             | NA        | NA    | NA             | 2000-2019 | 1.61  | 1.39 to 1.83   |
| Singapore                | 2000-2019 | -0.85 | -0.99 to -0.71 | NA        | NA    | NA             | NA        | NA    | NA             | NA        | NA    | NA             | 2000-2019 | -0.85 | -0.99 to -0.71 |
| Slovakia                 | 2000-2004 | -2.41 | -3.73 to -1.06 | 2004-2011 | 3.09  | 2.39 to 3.80   | 2011-2019 | 0.50  | 0.12 to 0.89   | NA        | NA    | NA             | 2000-2019 | 0.82  | 0.45 to 1.20   |
| Slovenia                 | 2000-2010 | 0.88  | 0.47 to 1.30   | 2010-2014 | -3.36 | -5.77 to -0.89 | 2014-2019 | 0.51  | -0.60 to 1.64  | NA        | NA    | NA             | 2000-2019 | -0.12 | -0.70 to 0.46  |
| Spain                    | 2000-2011 | 1.75  | 1.52 to 1.97   | 2011-2019 | -0.03 | -0.35 to 0.28  | NA        | NA    | NA             | NA        | NA    | NA             | 2000-2019 | 0.99  | 0.82 to 1.17   |
| Sweden                   | 2000-2007 | 0.76  | 0.30 to 1.23   | 2007-2014 | -1.80 | -2.34 to -1.25 | 2014-2019 | 0.04  | -0.69 to 0.78  | NA        | NA    | NA             | 2000-2019 | -0.38 | -0.67 to -0.08 |
| Switzerland              | 2000-2019 | -1.13 | -1.21 to -1.04 | NA        | NA    | NA             | NA        | NA    | NA             | NA        | NA    | NA             | 2000-2019 | -1.13 | -1.21 to -1.04 |
| Trinidad and Tobago      | 2000-2008 | 1.51  | 0.82 to 2.21   | 2008-2012 | -2.33 | -5.02 to 0.44  | 2012-2019 | 1.14  | 0.44 to 1.83   | NA        | NA    | NA             | 2000-2019 | 0.55  | -0.08 to 1.19  |
| United Kingdom           | 2000-2009 | -0.03 | -0.29 to 0.23  | 2009-2012 | -1.33 | -3.99 to 1.41  | 2012-2019 | 0.89  | 0.54 to 1.25   | NA        | NA    | NA             | 2000-2019 | 0.10  | -0.32 to 0.52  |
| United States of America | 2000-2002 | -0.64 | -3.01 to 1.78  | 2002-2006 | -2.65 | -3.81 to -1.48 | 2006-2015 | -0.28 | -0.53 to -0.03 | 2015-2019 | 0.34  | -0.34 to 1.03  | 2000-2019 | -0.69 | -1.04 to -0.34 |
| Uruguay                  | 2000-2019 | 0.05  | -0.10 to 0.20  | NA        | NA    | NA             | NA        | NA    | NA             | NA        | NA    | NA             | 2000-2019 | 0.05  | -0.10 to 0.20  |

AAPC: Average annual percent change; CRC: Colorectal cancer;EAPC: Estimated annual percentage change; NA: Not available.

**Supplementary Table 4: Joinpoint analysis for CRC, age-standardized mortality in 2000–2019 for both genders, all ages.**

| Country             | Trend 1   |            | Trend 2       |           |       | Trend 3        |           |       | Trend 4       |            |       | Year          | AAPC Range |      |               |
|---------------------|-----------|------------|---------------|-----------|-------|----------------|-----------|-------|---------------|------------|-------|---------------|------------|------|---------------|
|                     | Year      | EAPC Range | Year          | EAPC      | Range | Year           | EAPC      | Range | Year          | EAPC Range |       |               |            |      |               |
| Antigua and Barbuda | 2000-2004 | -0.85      | -2.78 to 1.13 | 2004-2007 | 3.93  | -2.01 to 10.23 | 2007-2019 | 0.52  | 0.23 to 0.81  | NA         | NA    | NA            | 2000-2019  | 0.76 | -0.17 to 1.70 |
| Argenti             | 2000-2003 | 0.61       | -0.69 to 1.93 | 2003-2014 | -0.51 | -0.70 to -0.32 | 2014-2017 | 1.87  | -0.47 to 4.26 | 2017-2019  | -0.25 | -2.45 to 1.99 | 2000-2019  | 0.06 | -0.36 to 0.49 |

|            |           |       |                |           |       |                |           |       |                |           |       |                |           |       |                |
|------------|-----------|-------|----------------|-----------|-------|----------------|-----------|-------|----------------|-----------|-------|----------------|-----------|-------|----------------|
| Australia  | 2000-2003 | -4.26 | -5.98 to -2.52 | 2003-2014 | -1.84 | -2.11 to -1.56 | 2014-2019 | 0.64  | -0.10 to 1.39  | NA        | NA    | NA             | 2000-2019 | -1.58 | -1.92 to -1.24 |
| Austria    | 2000-2008 | -4.20 | -4.42 to -3.97 | 2008-2017 | -1.98 | -2.22 to -1.73 | 2017-2019 | -0.22 | -2.50 to 2.12  | NA        | NA    | NA             | 2000-2019 | -2.74 | -2.99 to -2.48 |
| Barbados   | 2000-2004 | 3.83  | 2.77 to 4.90   | 2004-2017 | -0.18 | -0.35 to -0.02 | 2017-2019 | 2.55  | 0.04 to 5.13   | NA        | NA    | NA             | 2000-2019 | 0.94  | 0.61 to 1.26   |
| Belgium    | 2000-2008 | -2.17 | -2.46 to -1.88 | 2008-2011 | 0.14  | -2.55 to 2.90  | 2011-2016 | -1.68 | -2.51 to -0.85 | 2016-2019 | 0.60  | -0.71 to 1.93  | 2000-2019 | -1.25 | -1.71 to -0.78 |
| Brazil     | 2000-2010 | 0.42  | 0.20 to 0.65   | 2010-2019 | -0.49 | -0.71 to -0.28 | NA        | NA    | NA             | NA        | NA    | NA             | 2000-2019 | -0.01 | -0.16 to 0.13  |
| Cada       | 2000-2008 | -0.66 | -0.87 to -0.45 | 2008-2011 | -1.78 | -3.52 to -0.00 | 2011-2017 | -0.48 | -0.86 to -0.10 | 2017-2019 | 1.51  | -0.13 to 3.17  | 2000-2019 | -0.56 | -0.87 to -0.24 |
| Chile      | 2000-2008 | 0.61  | 0.30 to 0.92   | 2008-2013 | 2.11  | 1.33 to 2.89   | 2013-2019 | -0.11 | -0.47 to 0.26  | NA        | NA    | NA             | 2000-2019 | 0.77  | 0.53 to 1.01   |
| Chi        | 2000-2004 | 4.90  | 4.28 to 5.53   | 2004-2011 | 0.94  | 0.67 to 1.21   | 2011-2016 | -1.49 | -1.94 to -1.04 | 2016-2019 | 1.38  | 0.70 to 2.06   | 2000-2019 | 1.18  | 0.98 to 1.38   |
| Colombia   | 2000-2019 | -0.09 | -0.28 to 0.10  | NA        | NA    | NA             | NA        | NA    | NA             | NA        | NA    | NA             | 2000-2019 | -0.09 | -0.28 to 0.10  |
| Costa Rica | 2000-2019 | 1.82  | 1.53 to 2.11   | NA        | NA    | NA             | NA        | NA    | NA             | NA        | NA    | NA             | 2000-2019 | 1.82  | 1.53 to 2.11   |
| Croatia    | 2000-2010 | 1.99  | 1.44 to 2.54   | 2010-2019 | -0.92 | -1.50 to -0.34 | NA        | NA    | NA             | NA        | NA    | NA             | 2000-2019 | 0.60  | 0.23 to 0.96   |
| Cuba       | 2000-2012 | 0.27  | -0.11 to 0.66  | 2012-2019 | 1.97  | 1.21 to 2.73   | NA        | NA    | NA             | NA        | NA    | NA             | 2000-2019 | 0.89  | 0.55 to 1.24   |
| Denmark    | 2000-2010 | -1.35 | -1.46 to -1.24 | 2010-2014 | -2.82 | -3.53 to -2.10 | 2014-2019 | -0.09 | -0.42 to 0.23  | NA        | NA    | NA             | 2000-2019 | -1.33 | -1.50 to -1.17 |
| Ecuador    | 2000-2006 | 5.54  | 4.54 to 6.56   | 2006-2019 | 0.73  | 0.51 to 0.95   | NA        | NA    | NA             | NA        | NA    | NA             | 2000-2019 | 2.22  | 1.91 to 2.54   |
| Estonia    | 2000-2007 | 0.88  | 0.13 to 1.63   | 2007-2019 | -1.19 | -1.50 to -0.87 | NA        | NA    | NA             | NA        | NA    | NA             | 2000-2019 | -0.43 | -0.74 to -0.12 |
| Fiji       | 2000-2002 | -2.80 | -5.38 to -0.15 | 2002-2012 | 2.11  | 1.89 to 2.34   | 2012-2019 | 0.90  | 0.64 to 1.15   | NA        | NA    | NA             | 2000-2019 | 1.14  | 0.85 to 1.43   |
| Finland    | 2000-2008 | -0.88 | -1.05 to -0.71 | 2008-2019 | -0.33 | -0.43 to -0.23 | NA        | NA    | NA             | NA        | NA    | NA             | 2000-2019 | -0.56 | -0.64 to -0.48 |
| France     | 2000-2002 | -0.92 | -3.65 to 1.89  | 2002-2006 | -2.79 | -4.15 to -1.40 | 2006-2016 | -1.36 | -1.62 to -1.11 | 2016-2019 | 0.48  | -0.89 to 1.86  | 2000-2019 | -1.33 | -1.75 to -0.91 |
| Germany    | 2000-2003 | 0.38  | -1.28 to 2.07  | 2003-2007 | -3.44 | -5.05 to -1.81 | 2007-2014 | -5.39 | -6.00 to -4.78 | 2014-2019 | 0.68  | -0.24 to 1.61  | 2000-2019 | -2.51 | -2.98 to -2.04 |
| Greece     | 2000-2010 | -1.59 | -1.80 to -1.38 | 2010-2019 | 0.57  | 0.32 to 0.83   | NA        | NA    | NA             | NA        | NA    | NA             | 2000-2019 | -0.57 | -0.72 to -0.42 |
| Greda      | 2000-2010 | 1.45  | 1.13 to 1.76   | 2010-2013 | -0.61 | -4.09 to 2.99  | 2013-2017 | 3.74  | 2.03 to 5.48   | 2017-2019 | -1.21 | -4.25 to 1.94  | 2000-2019 | 1.31  | 0.65 to 1.98   |
| Guatemala  | 2000-2005 | 2.62  | 2.03 to 3.22   | 2005-2008 | 0.23  | -1.99 to 2.51  | 2008-2013 | 1.79  | 1.14 to 2.45   | 2013-2019 | -0.40 | -0.71 to -0.10 | 2000-2019 | 1.06  | 0.69 to 1.44   |
| Guya       | 2000-2008 | -1.33 | -1.60 to -1.05 | 2008-2019 | 1.07  | 0.91 to 1.22   | NA        | NA    | NA             | NA        | NA    | NA             | 2000-2019 | 0.05  | -0.08 to 0.19  |

|                   |           |       |                |           |       |                |           |       |                 |           |       |               |           |       |                |
|-------------------|-----------|-------|----------------|-----------|-------|----------------|-----------|-------|-----------------|-----------|-------|---------------|-----------|-------|----------------|
| Hungary           | 2000-2005 | -0.19 | -1.16 to 0.80  | 2005-2019 | -0.98 | -1.18 to -0.77 | NA        | NA    | NA              | NA        | NA    | NA            | 2000-2019 | -0.77 | -1.04 to -0.50 |
| Iceland           | 2000-2002 | -0.14 | -2.94 to 2.75  | 2002-2017 | -1.55 | -1.67 to -1.42 | 2017-2019 | 0.14  | -2.37 to 2.72   | NA        | NA    | NA            | 2000-2019 | -1.22 | -1.59 to -0.86 |
| Israel            | 2000-2016 | -2.98 | -3.08 to -2.88 | 2016-2019 | 1.93  | 0.65 to 3.23   | NA        | NA    | NA              | NA        | NA    | NA            | 2000-2019 | -2.22 | -2.41 to -2.02 |
| Italy             | 2000-2003 | -0.36 | -1.52 to 0.81  | 2003-2016 | -1.61 | -1.74 to -1.47 | 2016-2019 | 0.28  | -0.89 to 1.47   | NA        | NA    | NA            | 2000-2019 | -1.11 | -1.36 to -0.87 |
| Japan             | 2000-2009 | -0.95 | -1.13 to -0.76 | 2009-2012 | 0.26  | -1.72 to 2.27  | 2012-2019 | -0.92 | -1.18 to -0.65  | NA        | NA    | NA            | 2000-2019 | -0.75 | -1.05 to -0.44 |
| Kuwait            | 2000-2005 | 1.31  | -0.34 to 2.99  | 2005-2008 | 7.61  | 0.95 to 14.71  | 2008-2011 | -6.73 | -11.98 to -1.16 | 2011-2019 | 0.40  | -0.15 to 0.96 | 2000-2019 | 0.57  | -0.68 to 1.84  |
| Kyrgyzstan        | 2000-2006 | -0.28 | -0.85 to 0.28  | 2006-2009 | -3.10 | -6.39 to 0.29  | 2009-2019 | -0.49 | -0.74 to -0.23  | NA        | NA    | NA            | 2000-2019 | -0.84 | -1.37 to -0.32 |
| Latvia            | 2000-2007 | 1.93  | 1.16 to 2.70   | 2007-2019 | -1.65 | -1.98 to -1.31 | NA        | NA    | NA              | NA        | NA    | NA            | 2000-2019 | -0.34 | -0.67 to -0.02 |
| Lithuania         | 2000-2007 | 1.66  | 0.78 to 2.56   | 2007-2019 | -1.36 | -1.74 to -0.98 | NA        | NA    | NA              | NA        | NA    | NA            | 2000-2019 | -0.26 | -0.63 to 0.12  |
| Luxembourg        | 2000-2006 | -1.84 | -2.10 to -1.58 | 2006-2013 | -2.80 | -3.06 to -2.53 | 2013-2016 | -4.61 | -6.13 to -3.07  | 2016-2019 | 0.12  | -0.66 to 0.91 | 2000-2019 | -2.33 | -2.59 to -2.07 |
| Malta             | 2000-2002 | 1.03  | -0.95 to 3.06  | 2002-2012 | -0.98 | -1.15 to -0.82 | 2012-2015 | -1.98 | -3.70 to -0.24  | 2015-2019 | -0.26 | -0.81 to 0.29 | 2000-2019 | -0.78 | -1.10 to -0.45 |
| Mauritius         | 2000-2005 | 3.21  | 1.98 to 4.46   | 2005-2012 | -0.15 | -0.93 to 0.64  | 2012-2017 | 1.97  | 0.67 to 3.29    | 2017-2019 | -0.15 | -3.79 to 3.63 | 2000-2019 | 1.28  | 0.70 to 1.87   |
| Mexico            | 2000-2019 | 1.68  | 1.55 to 1.81   | NA        | NA    | NA             | NA        | NA    | NA              | NA        | NA    | NA            | 2000-2019 | 1.68  | 1.55 to 1.81   |
| Netherlands       | 2000-2003 | -3.00 | -4.39 to -1.59 | 2003-2008 | 1.36  | 0.47 to 2.26   | 2008-2019 | -0.59 | -0.76 to -0.42  | NA        | NA    | NA            | 2000-2019 | -0.46 | -0.77 to -0.16 |
| New Zealand       | 2000-2016 | -1.66 | -1.83 to -1.50 | 2016-2019 | 1.18  | -0.88 to 3.29  | NA        | NA    | NA              | NA        | NA    | NA            | 2000-2019 | -1.22 | -1.54 to -0.90 |
| Norway            | 2000-2012 | -0.70 | -0.88 to -0.51 | 2012-2019 | -1.77 | -2.16 to -1.39 | NA        | NA    | NA              | NA        | NA    | NA            | 2000-2019 | -1.10 | -1.26 to -0.93 |
| Pama              | 2000-2003 | 2.83  | 1.58 to 4.10   | 2003-2007 | 0.35  | -0.75 to 1.46  | 2007-2014 | 1.47  | 1.13 to 1.80    | 2014-2019 | -0.21 | -0.58 to 0.17 | 2000-2019 | 1.00  | 0.70 to 1.30   |
| Philippines       | 2000-2004 | -1.02 | -1.56 to -0.47 | 2004-2007 | 0.42  | -1.22 to 2.08  | 2007-2015 | 2.34  | 2.15 to 2.54    | 2015-2019 | 0.61  | 0.23 to 0.99  | 2000-2019 | 0.96  | 0.69 to 1.23   |
| Poland            | 2000-2019 | -0.23 | -0.31 to -0.15 | NA        | NA    | NA             | NA        | NA    | NA              | NA        | NA    | NA            | 2000-2019 | -0.23 | -0.31 to -0.15 |
| Puerto Rico       | 2000-2019 | -0.34 | -0.57 to -0.11 | NA        | NA    | NA             | NA        | NA    | NA              | NA        | NA    | NA            | 2000-2019 | -0.34 | -0.57 to -0.11 |
| Republic of Korea | 2000-2010 | 0.62  | 0.50 to 0.74   | 2010-2016 | -3.00 | -3.28 to -2.72 | 2016-2019 | 0.62  | 0.01 to 1.23    | NA        | NA    | NA            | 2000-2019 | -0.54 | -0.67 to -0.41 |
| Republic of       | 2000-2009 | 5.04  | 4.36 to 5.72   | 2009-2012 | -2.05 | -7.96 to 4.24  | 2012-2015 | 2.93  | -3.30 to 9.56   | 2015-2019 | -4.26 | -6.09 to      | 2000-2019 | 1.55  | 0.26 to 2.86   |



|            |           |       |                |           |       |                |           |       |                |           |       |               |           |       |                |
|------------|-----------|-------|----------------|-----------|-------|----------------|-----------|-------|----------------|-----------|-------|---------------|-----------|-------|----------------|
| Barbados   | 2000-2005 | 4.62  | 3.27 to 6.00   | 2005-2010 | -1.07 | -2.67 to 0.56  | 2010-2017 | 0.41  | -0.40 to 1.22  | 2017-2019 | 5.07  | 0.71 to 9.62  | 2000-2019 | 1.59  | 0.91 to 2.27   |
| Belgium    | 2000-2019 | -0.49 | -0.61 to -0.36 | NA        | NA    | NA             | NA        | NA    | NA             | NA        | NA    | NA            | 2000-2019 | -0.49 | -0.61 to -0.36 |
| Brazil     | 2000-2003 | 2.82  | 1.23 to 4.43   | 2003-2011 | 1.25  | 0.89 to 1.62   | 2011-2019 | 0.28  | 0.03 to 0.52   | NA        | NA    | NA            | 2000-2019 | 1.09  | 0.81 to 1.36   |
| Cada       | 2000-2008 | 0.68  | 0.20 to 1.16   | 2008-2011 | -2.38 | -6.17 to 1.56  | 2011-2019 | 0.21  | -0.20 to 0.61  | NA        | NA    | NA            | 2000-2019 | -0.01 | -0.62 to 0.60  |
| Chile      | 2000-2007 | 2.33  | 1.45 to 3.21   | 2007-2014 | 3.75  | 2.86 to 4.65   | 2014-2019 | 0.24  | -0.72 to 1.20  | NA        | NA    | NA            | 2000-2019 | 2.29  | 1.82 to 2.77   |
| Chi        | 2000-2004 | 9.16  | 8.08 to 10.26  | 2004-2011 | 5.06  | 4.65 to 5.49   | 2011-2016 | 0.81  | 0.19 to 1.44   | 2016-2019 | 3.62  | 2.71 to 4.53  | 2000-2019 | 4.54  | 4.24 to 4.84   |
| Colombia   | 2000-2019 | 1.28  | 0.93 to 1.63   | NA        | NA    | NA             | NA        | NA    | NA             | NA        | NA    | NA            | 2000-2019 | 1.28  | 0.93 to 1.63   |
| Costa Rica | 2000-2019 | 3.40  | 3.05 to 3.74   | NA        | NA    | NA             | NA        | NA    | NA             | NA        | NA    | NA            | 2000-2019 | 3.40  | 3.05 to 3.74   |
| Croatia    | 2000-2008 | 3.66  | 2.83 to 4.50   | 2008-2019 | 0.20  | -0.23 to 0.63  | NA        | NA    | NA             | NA        | NA    | NA            | 2000-2019 | 1.64  | 1.25 to 2.04   |
| Cuba       | 2000-2012 | 1.25  | 0.75 to 1.75   | 2012-2019 | 3.70  | 2.76 to 4.64   | NA        | NA    | NA             | NA        | NA    | NA            | 2000-2019 | 2.15  | 1.72 to 2.58   |
| Denmark    | 2000-2007 | 1.36  | 0.51 to 2.21   | 2007-2015 | -1.19 | -1.95 to -0.43 | 2015-2019 | 0.62  | -1.13 to 2.41  | NA        | NA    | NA            | 2000-2019 | 0.12  | -0.40 to 0.65  |
| Ecuador    | 2000-2006 | 6.33  | 5.25 to 7.42   | 2006-2019 | 1.66  | 1.43 to 1.89   | NA        | NA    | NA             | NA        | NA    | NA            | 2000-2019 | 3.11  | 2.77 to 3.45   |
| Estonia    | 2000-2008 | 3.91  | 2.99 to 4.84   | 2008-2019 | -0.68 | -1.17 to -0.19 | NA        | NA    | NA             | NA        | NA    | NA            | 2000-2019 | 1.23  | 0.79 to 1.67   |
| Fiji       | 2000-2002 | -2.37 | -7.12 to 2.63  | 2002-2019 | 1.94  | 1.79 to 2.08   | NA        | NA    | NA             | NA        | NA    | NA            | 2000-2019 | 1.47  | 0.97 to 1.98   |
| Finland    | 2000-2008 | 1.13  | 0.73 to 1.54   | 2008-2019 | 0.24  | 0.03 to 0.46   | NA        | NA    | NA             | NA        | NA    | NA            | 2000-2019 | 0.62  | 0.42 to 0.81   |
| France     | 2000-2019 | -0.58 | -0.70 to -0.46 | NA        | NA    | NA             | NA        | NA    | NA             | NA        | NA    | NA            | 2000-2019 | -0.58 | -0.70 to -0.46 |
| Germany    | 2000-2003 | 0.89  | -1.01 to 2.83  | 2003-2008 | -1.80 | -2.95 to -0.64 | 2008-2014 | -4.02 | -4.87 to -3.16 | 2014-2019 | 1.07  | 0.15 to 1.99  | 2000-2019 | -1.35 | -1.83 to -0.86 |
| Greece     | 2000-2019 | 0.46  | 0.33 to 0.59   | NA        | NA    | NA             | NA        | NA    | NA             | NA        | NA    | NA            | 2000-2019 | 0.46  | 0.33 to 0.59   |
| Greda      | 2000-2010 | 1.30  | 0.77 to 1.83   | 2010-2013 | -5.31 | -11.02 to 0.77 | 2013-2017 | 4.81  | 1.91 to 7.80   | 2017-2019 | -0.10 | -5.05 to 5.10 | 2000-2019 | 0.80  | -0.33 to 1.94  |
| Guatemala  | 2000-2012 | 2.52  | 2.15 to 2.90   | 2012-2019 | -0.10 | -0.74 to 0.53  | NA        | NA    | NA             | NA        | NA    | NA            | 2000-2019 | 1.55  | 1.24 to 1.86   |
| Guya       | 2000-2007 | -1.81 | -2.09 to -1.52 | 2007-2019 | 1.65  | 1.54 to 1.77   | NA        | NA    | NA             | NA        | NA    | NA            | 2000-2019 | 0.36  | 0.24 to 0.48   |
| Hungary    | 2000-2005 | 1.28  | 0.16 to 2.41   | 2005-2019 | -0.08 | -0.30 to 0.13  | NA        | NA    | NA             | NA        | NA    | NA            | 2000-2019 | 0.27  | -0.03 to 0.58  |
| Iceland    | 2000-2009 | 0.91  | 0.40 to 1.43   | 2009-2019 | -0.74 | -1.11 to -0.36 | NA        | NA    | NA             | NA        | NA    | NA            | 2000-2019 | 0.04  | -0.25 to 0.33  |
| Israel     | 2000-2008 | -0.92 | -1.41 to -0.43 | 2008-2014 | -2.73 | -3.66 to -1.80 | 2014-2019 | 0.47  | -0.43 to 1.37  | NA        | NA    | NA            | 2000-2019 | -1.14 | -1.52 to -0.75 |
| Italy      | 2000-2003 | 2.97  | 1.42 to 4.53   | 2003-2008 | -0.48 | -1.38 to 0.43  | 2008-2014 | -1.80 | -2.42 to -1.17 | 2014-2019 | -0.49 | -1.12 to      | 2000-2019 | -0.37 | -0.74 to 0.00  |

|                     |           |       |                |           |       |                |           |       |                |           |       |                |           |       |                |
|---------------------|-----------|-------|----------------|-----------|-------|----------------|-----------|-------|----------------|-----------|-------|----------------|-----------|-------|----------------|
|                     |           |       |                |           |       |                |           |       |                |           |       | 0.14           |           |       |                |
| Japan               | 2000-2008 | -0.01 | -0.32 to 0.29  | 2008-2012 | 1.09  | -0.24 to 2.43  | 2012-2019 | -0.60 | -0.94 to -0.25 | NA        | NA    | NA             | 2000-2019 | 0.00  | -0.30 to 0.30  |
| Kuwait              | 2000-2003 | -0.72 | -6.00 to 4.85  | 2003-2008 | 9.23  | 6.02 to 12.54  | 2008-2011 | -5.50 | -12.74 to 2.34 | 2011-2019 | 3.58  | 2.85 to 4.31   | 2000-2019 | 2.83  | 1.29 to 4.40   |
| Kyrgyzstan          | 2000-2007 | -0.66 | -1.14 to -0.17 | 2007-2010 | -3.18 | -6.76 to 0.54  | 2010-2013 | 1.92  | -1.80 to 5.78  | 2013-2019 | 0.05  | -0.51 to 0.62  | 2000-2019 | -0.43 | -1.18 to 0.32  |
| Latvia              | 2000-2007 | 3.75  | 2.53 to 4.98   | 2007-2019 | -1.09 | -1.58 to -0.58 | NA        | NA    | NA             | NA        | NA    | NA             | 2000-2019 | 0.67  | 0.17 to 1.17   |
| Lithuania           | 2000-2007 | 2.56  | 1.37 to 3.75   | 2007-2015 | 0.00  | -1.10 to 1.11  | 2015-2019 | -2.79 | -5.32 to -0.19 | NA        | NA    | NA             | 2000-2019 | 0.33  | -0.42 to 1.10  |
| Luxembourg          | 2000-2004 | 1.97  | 1.07 to 2.87   | 2004-2013 | -2.77 | -3.06 to -2.49 | 2013-2016 | -4.24 | -6.79 to -1.62 | 2016-2019 | -0.01 | -1.31 to 1.31  | 2000-2019 | -1.59 | -2.04 to -1.14 |
| Malta               | 2000-2009 | 1.32  | 1.02 to 1.62   | 2009-2016 | -0.89 | -1.37 to -0.42 | 2016-2019 | 0.83  | -0.53 to 2.21  | NA        | NA    | NA             | 2000-2019 | 0.42  | 0.14 to 0.70   |
| Mauritius           | 2000-2004 | 4.27  | 1.97 to 6.62   | 2004-2019 | 1.09  | 0.86 to 1.32   | NA        | NA    | NA             | NA        | NA    | NA             | 2000-2019 | 1.75  | 1.28 to 2.22   |
| Mexico              | 2000-2012 | 2.59  | 2.25 to 2.92   | 2012-2019 | 3.51  | 2.96 to 4.06   | NA        | NA    | NA             | NA        | NA    | NA             | 2000-2019 | 2.93  | 2.66 to 3.19   |
| Netherlands         | 2000-2003 | -1.25 | -3.16 to 0.69  | 2003-2009 | 2.68  | 1.87 to 3.51   | 2009-2019 | -0.45 | -0.70 to -0.20 | NA        | NA    | NA             | 2000-2019 | 0.40  | 0.02 to 0.78   |
| New Zealand         | 2000-2015 | -0.67 | -0.86 to -0.48 | 2015-2019 | 1.74  | 0.47 to 3.03   | NA        | NA    | NA             | NA        | NA    | NA             | 2000-2019 | -0.17 | -0.45 to 0.11  |
| Norway              | 2000-2012 | 0.76  | 0.48 to 1.05   | 2012-2019 | -2.33 | -2.90 to -1.76 | NA        | NA    | NA             | NA        | NA    | NA             | 2000-2019 | -0.39 | -0.65 to -0.13 |
| Pama                | 2000-2019 | 1.84  | 1.71 to 1.98   | NA        | NA    | NA             | NA        | NA    | NA             | NA        | NA    | NA             | 2000-2019 | 1.84  | 1.71 to 1.98   |
| Philippines         | 2000-2007 | -0.18 | -0.51 to 0.14  | 2007-2014 | 3.37  | 3.01 to 3.73   | 2014-2019 | 1.09  | 0.70 to 1.48   | NA        | NA    | NA             | 2000-2019 | 1.45  | 1.27 to 1.63   |
| Poland              | 2000-2008 | 1.81  | 1.51 to 2.10   | 2008-2019 | 0.33  | 0.18 to 0.49   | NA        | NA    | NA             | NA        | NA    | NA             | 2000-2019 | 0.95  | 0.81 to 1.09   |
| Puerto Rico         | 2000-2009 | 2.13  | 1.46 to 2.80   | 2009-2019 | -0.05 | -0.54 to 0.45  | NA        | NA    | NA             | NA        | NA    | NA             | 2000-2019 | 0.98  | 0.60 to 1.35   |
| Republic of Korea   | 2000-2004 | 5.84  | 4.88 to 6.81   | 2004-2010 | 3.55  | 3.03 to 4.07   | 2010-2016 | -2.80 | -3.22 to -2.37 | 2016-2019 | 0.19  | -0.71 to 1.10  | 2000-2019 | 1.44  | 1.16 to 1.72   |
| Republic of Moldova | 2000-2009 | 6.10  | 5.21 to 7.00   | 2009-2012 | -0.81 | -8.23 to 7.21  | 2012-2015 | 5.72  | -2.04 to 14.10 | 2015-2019 | -2.99 | -5.16 to -0.76 | 2000-2019 | 2.96  | 1.34 to 4.61   |
| Romania             | 2000-2019 | 3.00  | 2.76 to 3.23   | NA        | NA    | NA             | NA        | NA    | NA             | NA        | NA    | NA             | 2000-2019 | 3.00  | 2.76 to 3.23   |
| Saint Lucia         | 2000-2011 | 0.14  | -0.18 to 0.46  | 2011-2019 | 3.05  | 2.63 to 3.47   | NA        | NA    | NA             | NA        | NA    | NA             | 2000-2019 | 1.35  | 1.12 to 1.59   |
| Serbia              | 2000-2008 | 3.55  | 3.17 to 3.93   | 2008-2015 | 1.39  | 0.88 to 1.89   | 2015-2019 | -0.55 | -1.44 to 0.34  | NA        | NA    | NA             | 2000-2019 | 1.88  | 1.60 to 2.16   |
| Singapore           | 2000-2002 | 1.29  | -3.65 to 6.47  | 2002-2006 | -2.10 | -4.41 to 0.26  | 2006-2009 | 1.28  | -3.06 to 5.82  | 2009-2019 | -1.44 | -1.73 to -1.16 | 2000-2019 | -0.87 | -1.74 to 0.00  |

|                          |           |       |                |           |       |                |           |       |                |           |       |               |           |       |                |
|--------------------------|-----------|-------|----------------|-----------|-------|----------------|-----------|-------|----------------|-----------|-------|---------------|-----------|-------|----------------|
| Slovakia                 | 2000-2004 | -2.78 | -4.28 to -1.25 | 2004-2011 | 3.35  | 2.55 to 4.16   | 2011-2019 | -0.03 | -0.46 to 0.40  | NA        | NA    | NA            | 2000-2019 | 0.61  | 0.19 to 1.04   |
| Slovenia                 | 2000-2008 | 1.02  | -0.19 to 2.24  | 2008-2019 | -1.16 | -1.82 to -0.50 | NA        | NA    | NA             | NA        | NA    | NA            | 2000-2019 | -0.25 | -0.83 to 0.34  |
| Spain                    | 2000-2011 | 2.11  | 1.90 to 2.32   | 2011-2019 | -0.22 | -0.51 to 0.06  | NA        | NA    | NA             | NA        | NA    | NA            | 2000-2019 | 1.12  | 0.96 to 1.28   |
| Sweden                   | 2000-2004 | 1.78  | 0.92 to 2.65   | 2004-2009 | -0.50 | -1.29 to 0.30  | 2009-2013 | -2.64 | -3.86 to -1.40 | 2013-2019 | -0.19 | -0.62 to 0.23 | 2000-2019 | -0.38 | -0.73 to -0.03 |
| Switzerland              | 2000-2009 | -0.97 | -1.22 to -0.72 | 2009-2016 | -2.01 | -2.45 to -1.57 | 2016-2019 | -0.63 | -1.93 to 0.68  | NA        | NA    | NA            | 2000-2019 | -1.30 | -1.56 to -1.05 |
| Trinidad and Tobago      | 2000-2008 | 2.05  | 0.94 to 3.17   | 2008-2012 | -3.38 | -7.55 to 0.98  | 2012-2019 | 1.37  | 0.27 to 2.49   | NA        | NA    | NA            | 2000-2019 | 0.63  | -0.37 to 1.65  |
| United Kingdom           | 2000-2009 | -0.07 | -0.35 to 0.21  | 2009-2012 | -1.86 | -4.73 to 1.11  | 2012-2019 | 0.77  | 0.39 to 1.16   | NA        | NA    | NA            | 2000-2019 | -0.04 | -0.50 to 0.41  |
| United States of America | 2000-2002 | -0.75 | -3.45 to 2.03  | 2002-2006 | -2.85 | -4.17 to -1.50 | 2006-2015 | -0.21 | -0.50 to 0.07  | 2015-2019 | 0.61  | -0.16 to 1.38 | 2000-2019 | -0.66 | -1.05 to -0.26 |
| Uruguay                  | 2000-2011 | 0.65  | 0.25 to 1.06   | 2011-2016 | -1.27 | -3.04 to 0.53  | 2016-2019 | 2.27  | -0.52 to 5.14  | NA        | NA    | NA            | 2000-2019 | 0.39  | -0.22 to 1.02  |

AAPC: Average annual percent change; CRC: Colorectal cancer;EAPC: Estimated annual percentage change; NA: Not available.

**Supplementary Table 6: Joinpoint analysis for CRC, age-standardized mortality in 2000–2019 for males, all ages.**

| Country             | Year      | Trend 1 |                | Year      | Trend 2 |                | Year      | Trend 3 |                | Year      | Trend 4 |                | Year      | AAPC  | Range          |
|---------------------|-----------|---------|----------------|-----------|---------|----------------|-----------|---------|----------------|-----------|---------|----------------|-----------|-------|----------------|
|                     |           | EAPC    | Range          |           |       |                |
| Antigua and Barbuda | 2000-2005 | -0.26   | -1.14 to 0.62  | 2005-2008 | 10.06   | 6.34 to 13.92  | 2008-2011 | -5.55   | -8.60 to -2.40 | 2011-2019 | 0.05    | -0.28 to 0.38  | 2000-2019 | 0.56  | -0.13 to 1.26  |
| Argentina           | 2000-2003 | 1.04    | -0.96 to 3.08  | 2003-2014 | -0.48   | -0.77 to -0.19 | 2014-2019 | 1.04    | 0.26 to 1.83   | NA        | NA      | NA             | 2000-2019 | 0.16  | -0.22 to 0.53  |
| Australia           | 2000-2003 | -5.61   | -7.24 to -3.96 | 2003-2008 | -0.82   | -1.90 to 0.28  | 2008-2013 | -2.58   | -3.61 to -1.54 | 2013-2019 | 0.38    | -0.15 to 0.93  | 2000-2019 | -1.68 | -2.12 to -1.24 |
| Austria             | 2000-2003 | -3.59   | -4.55 to -2.62 | 2003-2007 | -4.87   | -5.86 to -3.87 | 2007-2013 | -2.77   | -3.24 to -2.30 | 2013-2019 | -1.31   | -1.67 to -0.95 | 2000-2019 | -2.89 | -3.17 to -2.61 |
| Barbados            | 2000-2005 | 4.28    | 2.96 to 5.62   | 2005-2011 | -2.14   | -3.26 to -1.00 | 2011-2017 | 0.46    | -0.62 to 1.55  | 2017-2019 | 4.94    | 0.50 to 9.58   | 2000-2019 | 1.08  | 0.42 to 1.74   |
| Belgium             | 2000-2008 | -2.14   | -2.43 to -1.84 | 2008-2012 | -0.11   | -1.48 to 1.28  | 2012-2016 | -2.23   | -3.55 to -0.90 | 2016-2019 | 0.59    | -0.74 to       | 2000-2019 | -1.31 | -1.71 to -0.90 |



|            |           |       |                |           |       |                 |           |       |                |           |       |               |           |       |                |
|------------|-----------|-------|----------------|-----------|-------|-----------------|-----------|-------|----------------|-----------|-------|---------------|-----------|-------|----------------|
|            |           |       |                |           |       |                 |           |       |                |           |       | 1.94          |           |       |                |
| Brazil     | 2000-2010 | 0.84  | 0.57 to 1.11   | 2010-2019 | -0.22 | -0.48 to 0.03   | NA        | NA    | NA             | NA        | NA    | NA            | 2000-2019 | 0.33  | 0.16 to 0.51   |
| Cada       | 2000-2008 | -0.58 | -0.80 to -0.37 | 2008-2011 | -2.22 | -4.04 to -0.38  | 2011-2017 | -0.72 | -1.12 to -0.32 | 2017-2019 | 1.78  | 0.07 to 3.51  | 2000-2019 | -0.64 | -0.97 to -0.32 |
| Chile      | 2000-2004 | 1.97  | 0.66 to 3.31   | 2004-2007 | 0.09  | -3.62 to 3.93   | 2007-2014 | 2.28  | 1.70 to 2.86   | 2014-2019 | -0.40 | -1.04 to 0.25 | 2000-2019 | 1.16  | 0.54 to 1.78   |
| Chi        | 2000-2004 | 6.19  | 5.29 to 7.09   | 2004-2011 | 1.77  | 1.40 to 2.14    | 2011-2016 | -1.05 | -1.66 to -0.45 | 2016-2019 | 1.28  | 0.37 to 2.20  | 2000-2019 | 1.85  | 1.57 to 2.12   |
| Colombia   | 2000-2019 | 0.13  | -0.22 to 0.48  | NA        | NA    | NA              | NA        | NA    | NA             | NA        | NA    | NA            | 2000-2019 | 0.13  | -0.22 to 0.48  |
| Costa Rica | 2000-2019 | 2.50  | 2.17 to 2.84   | NA        | NA    | NA              | NA        | NA    | NA             | NA        | NA    | NA            | 2000-2019 | 2.50  | 2.17 to 2.84   |
| Croatia    | 2000-2008 | 2.75  | 2.00 to 3.52   | 2008-2019 | -0.74 | -1.15 to -0.34  | NA        | NA    | NA             | NA        | NA    | NA            | 2000-2019 | 0.71  | 0.35 to 1.08   |
| Cuba       | 2000-2011 | 0.27  | -0.22 to 0.75  | 2011-2019 | 2.72  | 2.03 to 3.40    | NA        | NA    | NA             | NA        | NA    | NA            | 2000-2019 | 1.29  | 0.92 to 1.66   |
| Denmark    | 2000-2002 | 0.20  | -2.26 to 2.72  | 2002-2009 | -1.57 | -1.98 to -1.17  | 2009-2015 | -2.31 | -2.83 to -1.78 | 2015-2019 | 0.28  | -0.48 to 1.03 | 2000-2019 | -1.23 | -1.56 to -0.91 |
| Ecuador    | 2000-2006 | 5.77  | 5.12 to 6.41   | 2006-2019 | 0.85  | 0.71 to 0.99    | NA        | NA    | NA             | NA        | NA    | NA            | 2000-2019 | 2.38  | 2.17 to 2.58   |
| Estonia    | 2000-2007 | 1.88  | 0.99 to 2.78   | 2007-2019 | -1.78 | -2.14 to -1.41  | NA        | NA    | NA             | NA        | NA    | NA            | 2000-2019 | -0.45 | -0.81 to -0.08 |
| Fiji       | 2000-2002 | -2.23 | -7.07 to 2.86  | 2002-2019 | 1.65  | 1.50 to 1.80    | NA        | NA    | NA             | NA        | NA    | NA            | 2000-2019 | 1.23  | 0.72 to 1.75   |
| Finland    | 2000-2012 | -0.65 | -0.72 to -0.57 | 2012-2019 | -0.27 | -0.43 to -0.12  | NA        | NA    | NA             | NA        | NA    | NA            | 2000-2019 | -0.51 | -0.58 to -0.44 |
| France     | 2000-2002 | -1.27 | -4.35 to 1.91  | 2002-2006 | -3.01 | -4.55 to -1.45  | 2006-2016 | -1.39 | -1.67 to -1.10 | 2016-2019 | 0.11  | -1.42 to 1.66 | 2000-2019 | -1.49 | -1.96 to -1.01 |
| Germany    | 2000-2002 | 1.46  | -1.97 to 5.00  | 2002-2007 | -2.26 | -3.29 to -1.22  | 2007-2014 | -5.28 | -5.86 to -4.69 | 2014-2019 | 0.34  | -0.52 to 1.21 | 2000-2019 | -2.33 | -2.80 to -1.86 |
| Greece     | 2000-2010 | -0.83 | -1.01 to -0.66 | 2010-2019 | 0.82  | 0.61 to 1.02    | NA        | NA    | NA             | NA        | NA    | NA            | 2000-2019 | -0.05 | -0.18 to 0.07  |
| Greda      | 2000-2010 | 1.09  | 0.58 to 1.61   | 2010-2013 | -7.11 | -12.79 to -1.06 | 2013-2017 | 4.61  | 1.66 to 7.65   | 2017-2019 | -1.47 | -6.44 to 3.77 | 2000-2019 | 0.20  | -0.93 to 1.35  |
| Guatemala  | 2000-2002 | 4.35  | -1.24 to 10.26 | 2002-2014 | 1.45  | 1.15 to 1.75    | 2014-2019 | -0.74 | -1.54 to 0.07  | NA        | NA    | NA            | 2000-2019 | 1.17  | 0.58 to 1.76   |
| Guya       | 2000-2007 | -1.64 | -1.96 to -1.31 | 2007-2019 | 1.21  | 1.08 to 1.34    | NA        | NA    | NA             | NA        | NA    | NA            | 2000-2019 | 0.15  | 0.02 to 0.28   |
| Hungary    | 2000-2005 | 0.40  | -0.50 to 1.31  | 2005-2019 | -0.74 | -0.92 to -0.56  | NA        | NA    | NA             | NA        | NA    | NA            | 2000-2019 | -0.44 | -0.69 to -0.19 |
| Iceland    | 2000-2012 | 0.00  | -0.25 to 0.24  | 2012-2015 | -3.34 | -7.01 to 0.47   | 2015-2019 | 0.11  | -1.05 to 1.29  | NA        | NA    | NA            | 2000-2019 | -0.51 | -1.12 to 0.10  |
| Israel     | 2000-2016 | -2.77 | -2.88 to -2.67 | 2016-2019 | 1.49  | 0.16 to 2.84    | NA        | NA    | NA             | NA        | NA    | NA            | 2000-2019 | -2.11 | -2.32 to -1.91 |

|                     |           |       |                |           |       |                |           |       |                |           |       |               |           |       |                |
|---------------------|-----------|-------|----------------|-----------|-------|----------------|-----------|-------|----------------|-----------|-------|---------------|-----------|-------|----------------|
| Italy               | 2000-2003 | 0.25  | -0.88 to 1.40  | 2003-2016 | -1.70 | -1.83 to -1.57 | 2016-2019 | -0.03 | -1.14 to 1.09  | NA        | NA    | NA            | 2000-2019 | -1.13 | -1.37 to -0.89 |
| Japan               | 2000-2009 | -1.03 | -1.21 to -0.85 | 2009-2012 | 0.13  | -1.78 to 2.07  | 2012-2019 | -1.10 | -1.36 to -0.85 | NA        | NA    | NA            | 2000-2019 | -0.88 | -1.17 to -0.58 |
| Kuwait              | 2000-2003 | -0.09 | -4.81 to 4.86  | 2003-2008 | 7.06  | 4.25 to 9.95   | 2008-2011 | -6.60 | -13.25 to 0.55 | 2011-2019 | 2.21  | 1.52 to 2.91  | 2000-2019 | 1.64  | 0.25 to 3.04   |
| Kyrgyzstan          | 2000-2007 | -0.94 | -1.39 to -0.49 | 2007-2010 | -4.08 | -7.41 to -0.64 | 2010-2015 | 0.77  | -0.33 to 1.88  | 2015-2019 | -0.87 | -1.88 to 0.14 | 2000-2019 | -0.98 | -1.57 to -0.40 |
| Latvia              | 2000-2007 | 2.79  | 1.62 to 3.97   | 2007-2019 | -2.00 | -2.49 to -1.50 | NA        | NA    | NA             | NA        | NA    | NA            | 2000-2019 | -0.26 | -0.74 to 0.22  |
| Lithuania           | 2000-2007 | 2.31  | 1.02 to 3.63   | 2007-2019 | -1.32 | -1.87 to -0.77 | NA        | NA    | NA             | NA        | NA    | NA            | 2000-2019 | 0.00  | -0.53 to 0.54  |
| Luxembourg          | 2000-2004 | -0.83 | -1.52 to -0.13 | 2004-2013 | -3.40 | -3.64 to -3.17 | 2013-2016 | -4.29 | -6.43 to -2.11 | 2016-2019 | 0.19  | -0.90 to 1.29 | 2000-2019 | -2.45 | -2.82 to -2.08 |
| Malta               | 2000-2002 | 1.77  | -1.08 to 4.70  | 2002-2012 | -0.10 | -0.33 to 0.14  | 2012-2015 | -3.33 | -5.58 to -1.04 | 2015-2019 | -0.52 | -1.25 to 0.22 | 2000-2019 | -0.51 | -0.95 to -0.06 |
| Mauritius           | 2000-2004 | 4.42  | 2.06 to 6.83   | 2004-2019 | 0.50  | 0.26 to 0.74   | NA        | NA    | NA             | NA        | NA    | NA            | 2000-2019 | 1.31  | 0.83 to 1.80   |
| Mexico              | 2000-2019 | 2.29  | 2.14 to 2.44   | NA        | NA    | NA             | NA        | NA    | NA             | NA        | NA    | NA            | 2000-2019 | 2.29  | 2.14 to 2.44   |
| Netherlands         | 2000-2003 | -3.45 | -4.85 to -2.04 | 2003-2008 | 1.63  | 0.74 to 2.53   | 2008-2019 | -0.89 | -1.06 to -0.72 | NA        | NA    | NA            | 2000-2019 | -0.64 | -0.95 to -0.34 |
| New Zealand         | 2000-2017 | -1.57 | -1.73 to -1.40 | 2017-2019 | 3.11  | -1.26 to 7.66  | NA        | NA    | NA             | NA        | NA    | NA            | 2000-2019 | -1.09 | -1.52 to -0.65 |
| Norway              | 2000-2005 | -1.39 | -2.15 to -0.62 | 2005-2012 | -0.44 | -1.00 to 0.12  | 2012-2019 | -2.28 | -2.69 to -1.86 | NA        | NA    | NA            | 2000-2019 | -1.37 | -1.66 to -1.07 |
| Pama                | 2000-2014 | 1.45  | 1.23 to 1.68   | 2014-2019 | -0.15 | -0.97 to 0.68  | NA        | NA    | NA             | NA        | NA    | NA            | 2000-2019 | 1.03  | 0.78 to 1.28   |
| Philippines         | 2000-2004 | -0.65 | -1.29 to -0.01 | 2004-2007 | 0.51  | -1.41 to 2.47  | 2007-2015 | 2.64  | 2.41 to 2.87   | 2015-2019 | 0.50  | 0.05 to 0.95  | 2000-2019 | 1.15  | 0.84 to 1.47   |
| Poland              | 2000-2007 | 0.90  | 0.55 to 1.26   | 2007-2019 | -0.28 | -0.41 to -0.14 | NA        | NA    | NA             | NA        | NA    | NA            | 2000-2019 | 0.16  | 0.01 to 0.30   |
| Puerto Rico         | 2000-2009 | 0.56  | -0.08 to 1.20  | 2009-2019 | -0.86 | -1.36 to -0.36 | NA        | NA    | NA             | NA        | NA    | NA            | 2000-2019 | -0.19 | -0.56 to 0.18  |
| Republic of Korea   | 2000-2008 | 1.33  | 1.11 to 1.55   | 2008-2011 | -0.25 | -1.91 to 1.44  | 2011-2016 | -3.90 | -4.38 to -3.41 | 2016-2019 | -0.20 | -0.94 to 0.56 | 2000-2019 | -0.56 | -0.85 to -0.27 |
| Republic of Moldova | 2000-2008 | 5.56  | 4.07 to 7.08   | 2008-2016 | 1.25  | -0.21 to 2.73  | 2016-2019 | -4.66 | -9.68 to 0.65  | NA        | NA    | NA            | 2000-2019 | 2.07  | 0.97 to 3.19   |
| Romania             | 2000-2019 | 2.01  | 1.80 to 2.22   | NA        | NA    | NA             | NA        | NA    | NA             | NA        | NA    | NA            | 2000-2019 | 2.01  | 1.80 to 2.22   |
| Saint Lucia         | 2000-2011 | -0.69 | -1.13 to -0.25 | 2011-2019 | 2.98  | 2.40 to 3.57   | NA        | NA    | NA             | NA        | NA    | NA            | 2000-2019 | 0.84  | 0.51 to 1.16   |
| Serbia              | 2000-2007 | 2.51  | 1.93 to 3.10   | 2007-2019 | -0.12 | -0.35 to 0.11  | NA        | NA    | NA             | NA        | NA    | NA            | 2000-2019 | 0.84  | 0.61 to 1.08   |

|                          |           |       |                |           |       |                |           |       |                |           |       |                |           |       |                |
|--------------------------|-----------|-------|----------------|-----------|-------|----------------|-----------|-------|----------------|-----------|-------|----------------|-----------|-------|----------------|
| Singapore                | 2000-2006 | -3.20 | -3.72 to -2.68 | 2006-2010 | -1.66 | -3.12 to -0.18 | 2010-2016 | -2.78 | -3.37 to -2.19 | 2016-2019 | -0.84 | -2.06 to 0.39  | 2000-2019 | -2.38 | -2.76 to -2.00 |
| Slovakia                 | 2000-2004 | -3.57 | -4.82 to -2.30 | 2004-2012 | 1.65  | 1.11 to 2.19   | 2012-2019 | -1.28 | -1.74 to -0.81 | NA        | NA    | NA             | 2000-2019 | -0.55 | -0.90 to -0.19 |
| Slovenia                 | 2000-2003 | 1.47  | -3.78 to 7.01  | 2003-2019 | -1.92 | -2.29 to -1.54 | NA        | NA    | NA             | NA        | NA    | NA             | 2000-2019 | -1.39 | -2.20 to -0.57 |
| Spain                    | 2000-2012 | 0.63  | 0.52 to 0.75   | 2012-2019 | -0.77 | -1.00 to -0.53 | NA        | NA    | NA             | NA        | NA    | NA             | 2000-2019 | 0.11  | 0.01 to 0.22   |
| Sweden                   | 2000-2004 | 0.62  | 0.17 to 1.08   | 2004-2008 | -0.84 | -1.51 to -0.16 | 2008-2014 | -2.51 | -2.81 to -2.21 | 2014-2019 | -0.36 | -0.67 to -0.06 | 2000-2019 | -0.94 | -1.12 to -0.76 |
| Switzerland              | 2000-2002 | -2.73 | -4.57 to -0.87 | 2002-2017 | -1.79 | -1.88 to -1.71 | 2017-2019 | -0.61 | -2.39 to 1.21  | NA        | NA    | NA             | 2000-2019 | -1.77 | -2.02 to -1.52 |
| Trinidad and Tobago      | 2000-2008 | 0.97  | -0.15 to 2.11  | 2008-2012 | -3.62 | -7.99 to 0.95  | 2012-2019 | 1.06  | -0.10 to 2.23  | NA        | NA    | NA             | 2000-2019 | 0.02  | -1.02 to 1.07  |
| United Kingdom           | 2000-2012 | -1.84 | -1.95 to -1.72 | 2012-2017 | -0.31 | -0.92 to 0.30  | 2017-2019 | 1.57  | -0.30 to 3.49  | NA        | NA    | NA             | 2000-2019 | -1.08 | -1.32 to -0.85 |
| United States of America | 2000-2002 | -1.37 | -3.02 to 0.31  | 2002-2006 | -2.95 | -3.77 to -2.13 | 2006-2014 | -0.91 | -1.12 to -0.69 | 2014-2019 | 0.69  | 0.35 to 1.04   | 2000-2019 | -0.97 | -1.21 to -0.73 |
| Uruguay                  | 2000-2011 | -0.01 | -0.30 to 0.29  | 2011-2016 | -1.48 | -2.80 to -0.13 | 2016-2019 | 1.48  | -0.62 to 3.62  | NA        | NA    | NA             | 2000-2019 | -0.16 | -0.63 to 0.30  |

AAPC: Average annual percent change; CRC: Colorectal cancer;EAPC: Estimated annual percentage change; NA: Not available.

**Supplementary Table 7: Joinpoint analysis for CRC, age-standardized incidence in 2000–2019 for females, all ages.**

| Country             | Trend 1   |       |                | Trend 2   |       |                | Trend 3   |       |                | Trend 4   |      |               | Year      | AAPC  | Range          |
|---------------------|-----------|-------|----------------|-----------|-------|----------------|-----------|-------|----------------|-----------|------|---------------|-----------|-------|----------------|
|                     | Year      | EAPC  | Range          | Year      | EAPC  | Range          | Year      | EAPC  | Range          | Year      | EAPC | Range         |           |       |                |
| Antigua and Barbuda | 2000-2005 | 1.01  | 0.66 to 1.36   | 2005-2010 | 2.19  | 1.75 to 2.63   | 2010-2016 | 2.64  | 2.37 to 2.91   | 2016-2019 | 0.51 | -0.02 to 1.04 | 2000-2019 | 1.75  | 1.59 to 1.92   |
| Argenti             | 2000-2014 | 0.20  | 0.00 to 0.40   | 2014-2019 | 2.12  | 1.27 to 2.98   | NA        | NA    | NA             | NA        | NA   | NA            | 2000-2019 | 0.70  | 0.46 to 0.95   |
| Australia           | 2000-2009 | -1.11 | -1.49 to -0.72 | 2009-2012 | -3.12 | -7.04 to 0.97  | 2012-2019 | 0.30  | -0.23 to 0.83  | NA        | NA   | NA            | 2000-2019 | -0.91 | -1.54 to -0.28 |
| Austria             | 2000-2006 | -3.81 | -4.55 to -3.06 | 2006-2019 | -1.35 | -1.60 to -1.10 | NA        | NA    | NA             | NA        | NA   | NA            | 2000-2019 | -2.14 | -2.41 to -1.87 |
| Barbados            | 2000-2003 | 5.51  | 3.62 to 7.43   | 2003-2007 | 0.81  | -0.82 to 2.45  | 2007-2010 | 2.92  | -0.16 to 6.09  | 2010-2019 | 0.00 | -0.25 to 0.24 | 2000-2019 | 1.48  | 0.90 to 2.06   |
| Belgium             | 2000-2019 | -0.54 | -0.67 to -0.41 | NA        | NA    | NA             | NA        | NA    | NA             | NA        | NA   | NA            | 2000-2019 | -0.54 | -0.67 to -0.41 |
| Brazil              | 2000-2003 | 2.05  | 1.01 to 3.11   | 2003-2011 | 0.52  | 0.28 to 0.76   | 2011-2019 | -0.25 | -0.42 to -0.08 | NA        | NA   | NA            | 2000-2019 | 0.44  | 0.25 to 0.62   |
| Cada                | 2000-2003 | 0.97  | -0.81 to 2.77  | 2003-2014 | -0.42 | -0.67 to -0.17 | 2014-2019 | 0.78  | 0.12 to 1.44   | NA        | NA   | NA            | 2000-2019 | 0.11  | -0.21 to 0.44  |

|            |           |       |                |           |       |                |           |       |                |           |       |               |           |       |                |
|------------|-----------|-------|----------------|-----------|-------|----------------|-----------|-------|----------------|-----------|-------|---------------|-----------|-------|----------------|
| Chile      | 2000-2008 | 1.59  | 1.10 to 2.09   | 2008-2013 | 3.33  | 2.12 to 4.55   | 2013-2019 | 0.38  | -0.17 to 0.93  | NA        | NA    | NA            | 2000-2019 | 1.66  | 1.29 to 2.04   |
| Chi        | 2000-2004 | 5.43  | 4.74 to 6.12   | 2004-2010 | 3.19  | 2.80 to 3.59   | 2010-2016 | -0.10 | -0.43 to 0.24  | 2016-2019 | 3.68  | 2.98 to 4.37  | 2000-2019 | 2.68  | 2.47 to 2.89   |
| Colombia   | 2000-2013 | 0.66  | 0.46 to 0.86   | 2013-2019 | 1.53  | 1.01 to 2.05   | NA        | NA    | NA             | NA        | NA    | NA            | 2000-2019 | 0.93  | 0.74 to 1.13   |
| Costa Rica | 2000-2019 | 1.90  | 1.58 to 2.23   | NA        | NA    | NA             | NA        | NA    | NA             | NA        | NA    | NA            | 2000-2019 | 1.90  | 1.58 to 2.23   |
| Croatia    | 2000-2015 | 2.08  | 1.75 to 2.42   | 2015-2019 | -2.87 | -5.05 to -0.64 | NA        | NA    | NA             | NA        | NA    | NA            | 2000-2019 | 1.02  | 0.52 to 1.53   |
| Cuba       | 2000-2008 | 1.47  | 0.81 to 2.13   | 2008-2011 | -0.28 | -5.46 to 5.19  | 2011-2019 | 2.08  | 1.54 to 2.63   | NA        | NA    | NA            | 2000-2019 | 1.45  | 0.62 to 2.28   |
| Denmark    | 2000-2010 | 0.54  | 0.29 to 0.80   | 2010-2014 | -2.31 | -3.83 to -0.77 | 2014-2019 | 0.63  | -0.07 to 1.33  | NA        | NA    | NA            | 2000-2019 | -0.04 | -0.40 to 0.32  |
| Ecuador    | 2000-2007 | 5.48  | 4.09 to 6.89   | 2007-2019 | 1.30  | 0.88 to 1.73   | NA        | NA    | NA             | NA        | NA    | NA            | 2000-2019 | 2.82  | 2.30 to 3.35   |
| Estonia    | 2000-2019 | 1.36  | 1.17 to 1.55   | NA        | NA    | NA             | NA        | NA    | NA             | NA        | NA    | NA            | 2000-2019 | 1.36  | 1.17 to 1.55   |
| Fiji       | 2000-2004 | -0.31 | -1.42 to 0.81  | 2004-2011 | 3.13  | 2.59 to 3.67   | 2011-2019 | 0.78  | 0.50 to 1.06   | NA        | NA    | NA            | 2000-2019 | 1.41  | 1.11 to 1.70   |
| Finland    | 2000-2019 | 0.25  | 0.10 to 0.39   | NA        | NA    | NA             | NA        | NA    | NA             | NA        | NA    | NA            | 2000-2019 | 0.25  | 0.10 to 0.39   |
| France     | 2000-2003 | 1.35  | -0.49 to 3.22  | 2003-2019 | -0.49 | -0.62 to -0.35 | NA        | NA    | NA             | NA        | NA    | NA            | 2000-2019 | -0.20 | -0.48 to 0.09  |
| Germany    | 2000-2003 | 0.39  | -1.63 to 2.44  | 2003-2014 | -3.97 | -4.31 to -3.63 | 2014-2019 | 1.51  | 0.38 to 2.65   | NA        | NA    | NA            | 2000-2019 | -1.87 | -2.29 to -1.45 |
| Greece     | 2000-2015 | -0.64 | -0.83 to -0.46 | 2015-2019 | 1.45  | 0.05 to 2.87   | NA        | NA    | NA             | NA        | NA    | NA            | 2000-2019 | -0.21 | -0.51 to 0.09  |
| Greda      | 2000-2019 | 2.66  | 2.50 to 2.81   | NA        | NA    | NA             | NA        | NA    | NA             | NA        | NA    | NA            | 2000-2019 | 2.66  | 2.50 to 2.81   |
| Guatemala  | 2000-2005 | 3.34  | 2.79 to 3.90   | 2005-2008 | 0.32  | -1.71 to 2.39  | 2008-2011 | 3.23  | 1.30 to 5.20   | 2011-2019 | 0.35  | 0.17 to 0.53  | 2000-2019 | 1.58  | 1.17 to 1.99   |
| Guya       | 2000-2009 | -1.13 | -1.41 to -0.84 | 2009-2019 | 1.41  | 1.20 to 1.63   | NA        | NA    | NA             | NA        | NA    | NA            | 2000-2019 | 0.20  | 0.04 to 0.37   |
| Hungary    | 2000-2007 | 0.01  | -0.66 to 0.69  | 2007-2014 | -1.42 | -2.27 to -0.56 | 2014-2019 | 0.49  | -0.66 to 1.64  | NA        | NA    | NA            | 2000-2019 | -0.39 | -0.85 to 0.06  |
| Iceland    | 2000-2004 | -0.19 | -0.79 to 0.42  | 2004-2009 | -4.76 | -5.34 to -4.17 | 2009-2017 | -1.94 | -2.20 to -1.68 | 2017-2019 | 0.33  | -1.59 to 2.28 | 2000-2019 | -2.09 | -2.35 to -1.83 |
| Israel     | 2000-2007 | -1.50 | -2.14 to -0.86 | 2007-2015 | -2.97 | -3.58 to -2.36 | 2015-2019 | 1.61  | 0.19 to 3.06   | NA        | NA    | NA            | 2000-2019 | -1.48 | -1.89 to -1.07 |
| Italy      | 2000-2003 | 1.95  | -0.47 to 4.43  | 2003-2019 | -1.00 | -1.18 to -0.82 | NA        | NA    | NA             | NA        | NA    | NA            | 2000-2019 | -0.54 | -0.91 to -0.16 |
| Japan      | 2000-2014 | 0.28  | 0.10 to 0.46   | 2014-2019 | -0.75 | -1.59 to 0.10  | NA        | NA    | NA             | NA        | NA    | NA            | 2000-2019 | 0.01  | -0.23 to 0.25  |
| Kuwait     | 2000-2005 | -0.56 | -2.54 to 1.46  | 2005-2009 | 4.22  | 0.21 to 8.39   | 2009-2015 | -5.09 | -6.56 to -3.60 | 2015-2019 | 0.65  | -1.30 to 2.64 | 2000-2019 | -0.79 | -1.79 to 0.23  |
| Kyrgyzstan | 2000-2004 | 0.81  | -0.53 to 2.15  | 2004-2009 | -1.29 | -2.60 to 0.04  | 2009-2019 | -0.23 | -0.53 to 0.08  | NA        | NA    | NA            | 2000-2019 | -0.29 | -0.72 to 0.14  |
| Latvia     | 2000-2006 | 3.41  | 2.37 to 4.45   | 2006-2015 | -0.85 | -1.47 to -0.23 | 2015-2019 | 1.19  | -0.69 to 3.10  | NA        | NA    | NA            | 2000-2019 | 0.91  | 0.37 to 1.44   |
| Lithuania  | 2000-2008 | 1.26  | 0.52 to 2.00   | 2008-2019 | -0.84 | -1.29 to -0.38 | NA        | NA    | NA             | NA        | NA    | NA            | 2000-2019 | 0.04  | -0.33 to 0.41  |
| Luxembourg | 2000-2010 | -0.40 | -0.76 to -0.03 | 2010-2013 | -2.31 | -6.69 to 2.26  | 2013-2016 | -6.33 | -10.62 to      | 2016-2019 | -0.48 | -2.79 to 1.89 | 2000-2019 | -1.67 | -2.62 to -0.72 |
|            |           |       |                |           |       |                |           |       | -1.83          |           |       |               |           |       |                |
| Malta      | 2000-2003 | 2.07  | 0.34 to 3.83   | 2003-2013 | -1.49 | -1.78 to -1.20 | 2013-2019 | 0.93  | 0.39 to 1.46   | NA        | NA    | NA            | 2000-2019 | -0.18 | -0.49 to 0.14  |
| Mauritius  | 2000-2006 | 2.07  | 0.91 to 3.24   | 2006-2011 | -0.41 | -2.27 to 1.49  | 2011-2019 | 2.80  | 2.24 to 3.37   | NA        | NA    | NA            | 2000-2019 | 1.72  | 1.12 to 2.32   |

|                          |           |       |                |           |       |                |           |       |                |           |      |              |           |       |                |
|--------------------------|-----------|-------|----------------|-----------|-------|----------------|-----------|-------|----------------|-----------|------|--------------|-----------|-------|----------------|
| Mexico                   | 2000-2019 | 1.64  | 1.49 to 1.78   | NA        | NA    | NA             | NA        | NA    | NA             | NA        | NA   | NA           | 2000-2019 | 1.64  | 1.49 to 1.78   |
| Netherlands              | 2000-2003 | -0.06 | -1.99 to 1.90  | 2003-2011 | 1.68  | 1.20 to 2.17   | 2011-2014 | -1.68 | -4.89 to 1.65  | 2014-2019 | 0.87 | 0.14 to 1.60 | 2000-2019 | 0.66  | 0.07 to 1.24   |
| New Zealand              | 2000-2004 | 0.37  | -1.00 to 1.75  | 2004-2013 | -1.68 | -2.11 to -1.24 | 2013-2019 | 0.73  | 0.09 to 1.37   | NA        | NA   | NA           | 2000-2019 | -0.49 | -0.86 to -0.13 |
| Norway                   | 2000-2011 | 0.59  | 0.33 to 0.85   | 2011-2019 | -1.44 | -1.81 to -1.06 | NA        | NA    | NA             | NA        | NA   | NA           | 2000-2019 | -0.27 | -0.47 to -0.07 |
| Pama                     | 2000-2003 | 2.53  | 0.29 to 4.82   | 2003-2010 | 0.15  | -0.50 to 0.81  | 2010-2013 | 3.61  | 0.06 to 7.29   | 2013-2019 | 1.38 | 0.87 to 1.90 | 2000-2019 | 1.45  | 0.83 to 2.08   |
| Philippines              | 2000-2006 | -0.84 | -1.18 to -0.51 | 2006-2010 | 2.39  | 1.48 to 3.31   | 2010-2013 | 3.34  | 1.70 to 5.02   | 2013-2019 | 1.16 | 0.92 to 1.40 | 2000-2019 | 1.12  | 0.82 to 1.42   |
| Poland                   | 2000-2012 | 0.37  | 0.21 to 0.54   | 2012-2019 | -0.21 | -0.55 to 0.14  | NA        | NA    | NA             | NA        | NA   | NA           | 2000-2019 | 0.16  | 0.01 to 0.31   |
| Puerto Rico              | 2000-2004 | 3.29  | 0.12 to 6.55   | 2004-2019 | 0.23  | -0.14 to 0.60  | NA        | NA    | NA             | NA        | NA   | NA           | 2000-2019 | 0.87  | 0.21 to 1.53   |
| Republic of Korea        | 2000-2009 | 2.60  | 2.36 to 2.83   | 2009-2016 | -1.73 | -2.08 to -1.38 | 2016-2019 | 2.24  | 1.26 to 3.24   | NA        | NA   | NA           | 2000-2019 | 0.93  | 0.72 to 1.13   |
| Republic of Moldova      | 2000-2008 | 4.95  | 3.81 to 6.11   | 2008-2015 | 0.79  | -0.69 to 2.30  | 2015-2019 | -3.38 | -5.97 to -0.72 | NA        | NA   | NA           | 2000-2019 | 1.61  | 0.78 to 2.45   |
| Romania                  | 2000-2019 | 1.76  | 1.62 to 1.90   | NA        | NA    | NA             | NA        | NA    | NA             | NA        | NA   | NA           | 2000-2019 | 1.76  | 1.62 to 1.90   |
| Saint Lucia              | 2000-2010 | -1.04 | -1.46 to -0.61 | 2010-2019 | 2.76  | 2.33 to 3.18   | NA        | NA    | NA             | NA        | NA   | NA           | 2000-2019 | 0.74  | 0.47 to 1.02   |
| Serbia                   | 2000-2009 | 1.95  | 1.64 to 2.26   | 2009-2019 | -0.09 | -0.34 to 0.15  | NA        | NA    | NA             | NA        | NA   | NA           | 2000-2019 | 0.87  | 0.69 to 1.05   |
| Singapore                | 2000-2019 | -0.86 | -1.03 to -0.68 | NA        | NA    | NA             | NA        | NA    | NA             | NA        | NA   | NA           | 2000-2019 | -0.86 | -1.03 to -0.68 |
| Slovakia                 | 2000-2005 | -1.24 | -2.21 to -0.26 | 2005-2009 | 3.86  | 1.70 to 6.07   | 2009-2019 | 1.15  | 0.86 to 1.44   | NA        | NA   | NA           | 2000-2019 | 1.08  | 0.59 to 1.56   |
| Slovenia                 | 2000-2011 | 0.26  | -0.20 to 0.71  | 2011-2014 | -5.22 | -11.34 to 1.31 | 2014-2019 | 0.30  | -1.20 to 1.83  | NA        | NA   | NA           | 2000-2019 | -0.62 | -1.65 to 0.42  |
| Spain                    | 2000-2006 | 0.32  | -0.32 to 0.95  | 2006-2009 | 2.61  | -0.92 to 6.28  | 2009-2019 | 0.21  | -0.04 to 0.47  | NA        | NA   | NA           | 2000-2019 | 0.62  | 0.08 to 1.17   |
| Sweden                   | 2000-2008 | 0.46  | 0.03 to 0.90   | 2008-2011 | -2.89 | -6.57 to 0.92  | 2011-2019 | -0.39 | -0.80 to 0.03  | NA        | NA   | NA           | 2000-2019 | -0.43 | -1.02 to 0.16  |
| Switzerland              | 2000-2014 | -1.14 | -1.36 to -0.93 | 2014-2019 | 0.29  | -0.70 to 1.30  | NA        | NA    | NA             | NA        | NA   | NA           | 2000-2019 | -0.77 | -1.05 to -0.49 |
| Trinidad and Tobago      | 2000-2019 | 0.29  | 0.09 to 0.48   | NA        | NA    | NA             | NA        | NA    | NA             | NA        | NA   | NA           | 2000-2019 | 0.29  | 0.09 to 0.48   |
| United Kingdom           | 2000-2013 | -0.19 | -0.35 to -0.03 | 2013-2019 | 1.02  | 0.53 to 1.51   | NA        | NA    | NA             | NA        | NA   | NA           | 2000-2019 | 0.19  | 0.02 to 0.36   |
| United States of America | 2000-2007 | -1.98 | -2.36 to -1.61 | 2007-2019 | -0.29 | -0.45 to -0.13 | NA        | NA    | NA             | NA        | NA   | NA           | 2000-2019 | -0.92 | -1.08 to -0.76 |
| Uruguay                  | 2000-2016 | -0.21 | -0.37 to -0.05 | 2016-2019 | 1.35  | -0.61 to 3.35  | NA        | NA    | NA             | NA        | NA   | NA           | 2000-2019 | 0.03  | -0.28 to 0.34  |

AAPC: Average annual percent change; CRC: Colorectal cancer;EAPC: Estimated annual percentage change; NA: Not available.

**Supplementary Table 8: Joinpoint analysis for CRC, age-standardized mortality in 2000–2019 for females, all ages.**

| Country             | Trend 1   |       |                | Trend 2   |       |                | Trend 3   |       |                | Trend 4   |       |               | Year      | AAPC  | Range          |
|---------------------|-----------|-------|----------------|-----------|-------|----------------|-----------|-------|----------------|-----------|-------|---------------|-----------|-------|----------------|
|                     | Year      | EAPC  | Range          | Year      | EAPC  | Range          | Year      | EAPC  | Range          | Year      | EAPC  | Range         |           |       |                |
| Antigua and Barbuda | 2000-2005 | -0.08 | -0.48 to 0.33  | 2005-2010 | 1.19  | 0.66 to 1.72   | 2010-2016 | 2.39  | 2.06 to 2.73   | 2016-2019 | -0.51 | -1.16 to 0.15 | 2000-2019 | 0.96  | 0.76 to 1.26   |
| Argenti             | 2000-2014 | -0.44 | -0.56 to -0.33 | 2014-2017 | 2.08  | -0.29 to 4.51  | 2017-2019 | -0.44 | -2.67 to 1.83  | NA        | NA    | NA            | 2000-2019 | -0.05 | -0.45 to 0.53  |
| Australia           | 2000-2005 | -3.17 | -3.89 to -2.44 | 2005-2013 | -2.02 | -2.45 to -1.58 | 2013-2019 | 0.45  | -0.07 to 0.97  | NA        | NA    | NA            | 2000-2019 | -1.55 | -1.83 to -1.24 |
| Austria             | 2000-2007 | -4.48 | -4.78 to -4.17 | 2007-2014 | -1.72 | -2.14 to -1.29 | 2014-2017 | -2.82 | -5.34 to -0.23 | 2017-2019 | 0.28  | -2.32 to 2.96 | 2000-2019 | -2.71 | -3.16 to -2.61 |
| Barbados            | 2000-2003 | 4.37  | 2.71 to 6.05   | 2003-2007 | -0.03 | -1.50 to 1.46  | 2007-2010 | 1.62  | -1.21 to 4.53  | 2010-2019 | -0.21 | -0.44 to 0.03 | 2000-2019 | 0.83  | 0.30 to 1.74   |
| Belgium             | 2000-2008 | -2.16 | -2.45 to -1.88 | 2008-2017 | -0.96 | -1.25 to -0.67 | 2017-2019 | 0.98  | -1.64 to 3.68  | NA        | NA    | NA            | 2000-2019 | -1.27 | -1.56 to -0.9  |
| Brazil              | 2000-2003 | 0.87  | -0.26 to 2.00  | 2003-2011 | -0.17 | -0.43 to 0.10  | 2011-2019 | -0.76 | -0.95 to -0.57 | NA        | NA    | NA            | 2000-2019 | -0.26 | -0.46 to 0.51  |
| Cada                | 2000-2003 | -0.39 | -1.34 to 0.57  | 2003-2011 | -1.11 | -1.35 to -0.87 | 2011-2017 | -0.26 | -0.64 to 0.11  | 2017-2019 | 1.20  | -0.41 to 2.83 | 2000-2019 | -0.49 | -0.73 to -0.32 |
| Chile               | 2000-2008 | 0.14  | -0.13 to 0.40  | 2008-2012 | 2.00  | 0.92 to 3.10   | 2012-2019 | -0.04 | -0.30 to 0.22  | NA        | NA    | NA            | 2000-2019 | 0.46  | 0.22 to 1.78   |
| Chi                 | 2000-2004 | 2.96  | 2.57 to 3.36   | 2004-2011 | -0.28 | -0.46 to -0.10 | 2011-2015 | -2.59 | -3.08 to -2.10 | 2015-2019 | 0.89  | 0.59 to 1.20  | 2000-2019 | 0.15  | 0.01 to 2.12   |
| Colombia            | 2000-2009 | -0.08 | -0.40 to 0.24  | 2009-2012 | -1.75 | -4.78 to 1.38  | 2012-2019 | 0.44  | 0.05 to 0.83   | NA        | NA    | NA            | 2000-2019 | -0.16 | -0.64 to 0.48  |
| Costa Rica          | 2000-2019 | 1.16  | 0.87 to 1.45   | NA        | NA    | NA             | NA        | NA    | NA             | NA        | NA    | NA            | 2000-2019 | 1.16  | 0.87 to 2.84   |
| Croatia             | 2000-2012 | 1.38  | 0.87 to 1.90   | 2012-2019 | -1.61 | -2.69 to -0.52 | NA        | NA    | NA             | NA        | NA    | NA            | 2000-2019 | 0.27  | -0.21 to 1.08  |
| Cuba                | 2000-2012 | 0.15  | -0.21 to 0.51  | 2012-2019 | 1.18  | 0.47 to 1.90   | NA        | NA    | NA             | NA        | NA    | NA            | 2000-2019 | 0.53  | 0.21 to 1.66   |
| Denmark             | 2000-2004 | -1.83 | -2.25 to -1.40 | 2004-2010 | -1.22 | -1.52 to -0.91 | 2010-2014 | -2.92 | -3.59 to -2.25 | 2014-2019 | -0.13 | -0.44 to 0.18 | 2000-2019 | -1.42 | -1.60 to -0.91 |
| Ecuador             | 2000-2007 | 4.64  | 3.45 to 5.84   | 2007-2019 | 0.45  | 0.07 to 0.83   | NA        | NA    | NA             | NA        | NA    | NA            | 2000-2019 | 1.97  | 1.52 to 2.58   |
| Estonia             | 2000-2019 | -0.50 | -0.70 to -0.30 | NA        | NA    | NA             | NA        | NA    | NA             | NA        | NA    | NA            | 2000-2019 | -0.50 | -0.70 to -0.08 |
| Fiji                | 2000-2004 | -0.45 | -1.54 to 0.65  | 2004-2011 | 2.98  | 2.45 to 3.51   | 2011-2019 | 0.40  | 0.13 to 0.68   | NA        | NA    | NA            | 2000-2019 | 1.16  | 0.87 to 1.75   |
| Finland             | 2000-2007 | -1.40 | -1.71 to -1.10 | 2007-2019 | -0.37 | -0.51 to -0.24 | NA        | NA    | NA             | NA        | NA    | NA            | 2000-2019 | -0.75 | -0.88 to -0.44 |
| France              | 2000-2003 | -1.21 | -2.34 to -0.07 | 2003-2006 | -2.91 | -5.17 to -0.60 | 2006-2016 | -1.38 | -1.59 to -1.17 | 2016-2019 | 0.89  | -0.25 to 2.05 | 2000-2019 | -1.24 | -1.64 to -1.01 |
| Germany             | 2000-2003 | 0.67  | -1.61 to 3.00  | 2003-2014 | -5.34 | -5.73 to -4.95 | 2014-2019 | 0.76  | -0.60 to 2.14  | NA        | NA    | NA            | 2000-2019 | -2.83 | -3.32 to -1.86 |
| Greece              | 2000-2010 | -2.32 | -2.57 to -2.07 | 2010-2015 | -0.59 | -1.70 to 0.54  | 2015-2019 | 1.68  | 0.57 to 2.81   | NA        | NA    | NA            | 2000-2019 | -1.03 | -1.39 to 0.07  |
| Greda               | 2000-2004 | 1.02  | -0.59 to 2.65  | 2004-2017 | 2.72  | 2.46 to 2.97   | 2017-2019 | -0.92 | -4.46 to 2.76  | NA        | NA    | NA            | 2000-2019 | 1.97  | 1.48 to 1.35   |
| Guatemala           | 2000-2005 | 2.40  | 1.85 to 2.95   | 2005-2008 | 0.29  | -1.75 to 2.38  | 2008-2013 | 1.61  | 1.01 to 2.21   | 2013-2019 | -0.25 | -0.53 to 0.03 | 2000-2019 | 1.02  | 0.67 to 1.76   |

|                     |           |       |                |           |       |                |           |       |                |           |       |                |           |       |                |
|---------------------|-----------|-------|----------------|-----------|-------|----------------|-----------|-------|----------------|-----------|-------|----------------|-----------|-------|----------------|
| Guya                | 2000-2009 | -1.16 | -1.45 to -0.87 | 2009-2019 | 0.95  | 0.73 to 1.17   | NA        | NA    | NA             | NA        | NA    | NA             | 2000-2019 | -0.06 | -0.22 to 0.28  |
| Hungary             | 2000-2019 | -1.34 | -1.50 to -1.18 | NA        | NA    | NA             | NA        | NA    | NA             | NA        | NA    | NA             | 2000-2019 | -1.34 | -1.50 to -0.19 |
| Iceland             | 2000-2004 | -1.90 | -2.42 to -1.37 | 2004-2009 | -4.25 | -4.77 to -3.73 | 2009-2017 | -2.04 | -2.27 to -1.81 | 2017-2019 | -0.18 | -1.85 to 1.51  | 2000-2019 | -2.41 | -2.64 to 0.1   |
| Israel              | 2000-2015 | -3.38 | -3.50 to -3.25 | 2015-2019 | 0.93  | -0.00 to 1.87  | NA        | NA    | NA             | NA        | NA    | NA             | 2000-2019 | -2.49 | -2.68 to -1.91 |
| Italy               | 2000-2016 | -1.58 | -1.69 to -1.46 | 2016-2019 | 0.47  | -1.04 to 2.00  | NA        | NA    | NA             | NA        | NA    | NA             | 2000-2019 | -1.26 | -1.49 to -0.89 |
| Japan               | 2000-2008 | -0.95 | -1.30 to -0.60 | 2008-2019 | -0.48 | -0.69 to -0.26 | NA        | NA    | NA             | NA        | NA    | NA             | 2000-2019 | -0.68 | -0.85 to -0.58 |
| Kuwait              | 2000-2005 | -0.53 | -2.34 to 1.31  | 2005-2009 | 3.70  | 0.04 to 7.50   | 2009-2015 | -6.08 | -7.43 to -4.70 | 2015-2019 | 0.21  | -1.66 to 2.11  | 2000-2019 | -1.30 | -2.23 to 3.04  |
| Kyrgyzstan          | 2000-2003 | 0.69  | -1.60 to 3.04  | 2003-2019 | -1.06 | -1.23 to -0.89 | NA        | NA    | NA             | NA        | NA    | NA             | 2000-2019 | -0.79 | -1.14 to -0.4  |
| Latvia              | 2000-2006 | 1.79  | 0.71 to 2.88   | 2006-2019 | -1.38 | -1.71 to -1.04 | NA        | NA    | NA             | NA        | NA    | NA             | 2000-2019 | -0.39 | -0.76 to 0.22  |
| Lithuania           | 2000-2008 | 0.71  | 0.08 to 1.34   | 2008-2019 | -1.49 | -1.88 to -1.10 | NA        | NA    | NA             | NA        | NA    | NA             | 2000-2019 | -0.57 | -0.89 to 0.54  |
| Luxembourg          | 2000-2003 | -3.29 | -4.67 to -1.89 | 2003-2012 | -1.70 | -2.01 to -1.38 | 2012-2016 | -4.84 | -6.26 to -3.41 | 2016-2019 | -0.26 | -1.73 to 1.24  | 2000-2019 | -2.40 | -2.80 to -2.08 |
| g                   |           |       |                |           |       |                |           |       |                |           |       |                |           |       |                |
| Malta               | 2000-2002 | 0.41  | -3.26 to 4.22  | 2002-2013 | -2.21 | -2.48 to -1.93 | 2013-2019 | -0.12 | -0.72 to 0.48  | NA        | NA    | NA             | 2000-2019 | -1.28 | -1.69 to -0.06 |
| Mauritius           | 2000-2006 | 2.09  | 0.88 to 3.31   | 2006-2011 | -0.92 | -2.87 to 1.06  | 2011-2019 | 2.22  | 1.62 to 2.82   | NA        | NA    | NA             | 2000-2019 | 1.34  | 0.72 to 1.8    |
| Mexico              | 2000-2019 | 1.05  | 0.92 to 1.17   | NA        | NA    | NA             | NA        | NA    | NA             | NA        | NA    | NA             | 2000-2019 | 1.05  | 0.92 to 2.44   |
| Netherlands         | 2000-2003 | -2.38 | -3.33 to -1.42 | 2003-2011 | 0.58  | 0.33 to 0.83   | 2011-2014 | -1.65 | -3.36 to 0.10  | 2014-2019 | 0.19  | -0.20 to 0.57  | 2000-2019 | -0.35 | -0.65 to -0.34 |
| New Zealand         | 2000-2002 | -3.59 | -6.20 to -0.91 | 2002-2005 | 0.09  | -2.56 to 2.81  | 2005-2014 | -2.26 | -2.54 to -1.98 | 2014-2019 | 0.09  | -0.45 to 0.64  | 2000-2019 | -1.42 | -1.89 to -0.65 |
| Norway              | 2000-2012 | -0.77 | -0.94 to -0.60 | 2012-2019 | -1.48 | -1.85 to -1.12 | NA        | NA    | NA             | NA        | NA    | NA             | 2000-2019 | -1.03 | -1.19 to -1.07 |
| Pama                | 2000-2004 | 2.31  | 1.13 to 3.50   | 2004-2010 | -0.08 | -0.79 to 0.64  | 2010-2013 | 2.99  | 0.03 to 6.03   | 2013-2019 | -0.27 | -0.71 to 0.17  | 2000-2019 | 0.84  | 0.33 to 1.28   |
| Philippines         | 2000-2004 | -1.42 | -1.92 to -0.93 | 2004-2007 | 0.51  | -0.99 to 2.03  | 2007-2015 | 2.05  | 1.87 to 2.23   | 2015-2019 | 0.62  | 0.27 to 0.97   | 2000-2019 | 0.76  | 0.52 to 1.47   |
| Poland              | 2000-2016 | -0.78 | -0.89 to -0.68 | 2016-2019 | 0.19  | -1.12 to 1.52  | NA        | NA    | NA             | NA        | NA    | NA             | 2000-2019 | -0.63 | -0.84 to 0.3   |
| Puerto Rico         | 2000-2019 | -0.51 | -0.75 to -0.26 | NA        | NA    | NA             | NA        | NA    | NA             | NA        | NA    | NA             | 2000-2019 | -0.51 | -0.75 to 0.18  |
| Republic of Korea   | 2000-2005 | -1.01 | -1.27 to -0.74 | 2005-2009 | 0.14  | -0.41 to 0.69  | 2009-2016 | -2.30 | -2.47 to -2.14 | 2016-2019 | 1.48  | 1.00 to 1.96   | 2000-2019 | -0.86 | -1.00 to -0.27 |
| Republic of Moldova | 2000-2009 | 4.37  | 3.68 to 5.07   | 2009-2012 | -2.50 | -8.66 to 4.08  | 2012-2015 | 1.21  | -5.24 to 8.11  | 2015-2019 | -4.71 | -6.67 to -2.70 | 2000-2019 | 0.81  | -0.55 to 3.19  |
| Romania             | 2000-2019 | 0.61  | 0.49 to 0.73   | NA        | NA    | NA             | NA        | NA    | NA             | NA        | NA    | NA             | 2000-2019 | 0.61  | 0.49 to 2.22   |
| Saint Lucia         | 2000-2005 | -0.88 | -2.14 to 0.39  | 2005-2010 | -2.85 | -4.51 to -1.16 | 2010-2017 | 3.19  | 2.35 to 4.04   | 2017-2019 | 0.80  | -3.38 to 5.17  | 2000-2019 | 0.25  | -0.43 to 1.16  |
| Serbia              | 2000-2006 | 1.63  | 0.91 to 2.36   | 2006-2019 | -0.90 | -1.11 to -0.69 | NA        | NA    | NA             | NA        | NA    | NA             | 2000-2019 | -0.11 | -0.35 to 1.08  |

|                          |           |       |                |           |       |                |           |       |                |           |      |               |           |       |                |
|--------------------------|-----------|-------|----------------|-----------|-------|----------------|-----------|-------|----------------|-----------|------|---------------|-----------|-------|----------------|
| Singapore                | 2000-2017 | -2.48 | -2.64 to -2.31 | 2017-2019 | 0.83  | -3.26 to 5.10  | NA        | NA    | NA             | NA        | NA   | NA            | 2000-2019 | -2.13 | -2.55 to -2    |
| Slovakia                 | 2000-2005 | -2.43 | -3.24 to -1.61 | 2005-2009 | 2.25  | 0.39 to 4.14   | 2009-2019 | 0.07  | -0.19 to 0.33  | NA        | NA   | NA            | 2000-2019 | -0.14 | -0.56 to -0.19 |
| Slovenia                 | 2000-2011 | -1.40 | -1.80 to -1.00 | 2011-2014 | -5.92 | -11.56 to 0.08 | 2014-2019 | -0.35 | -1.76 to 1.07  | NA        | NA   | NA            | 2000-2019 | -1.85 | -2.79 to -0.57 |
| Spain                    | 2000-2006 | -1.19 | -1.58 to -0.80 | 2006-2009 | 0.65  | -1.62 to 2.97  | 2009-2017 | -0.41 | -0.70 to -0.11 | 2017-2019 | 1.13 | -0.96 to 3.27 | 2000-2019 | -0.33 | -0.72 to 0.22  |
| Sweden                   | 2000-2007 | -0.11 | -0.33 to 0.11  | 2007-2014 | -1.95 | -2.23 to -1.68 | 2014-2019 | -0.03 | -0.40 to 0.34  | NA        | NA   | NA            | 2000-2019 | -0.77 | -0.92 to -0.76 |
| Switzerland              | 2000-2005 | -2.85 | -3.29 to -2.41 | 2005-2011 | -1.20 | -1.65 to -0.74 | 2011-2019 | -0.21 | -0.43 to 0.00  | NA        | NA   | NA            | 2000-2019 | -1.22 | -1.41 to -1.52 |
| Trinidad and Tobago      | 2000-2012 | -0.85 | -1.25 to -0.45 | 2012-2019 | 0.38  | -0.42 to 1.18  | NA        | NA    | NA             | NA        | NA   | NA            | 2000-2019 | -0.40 | -0.76 to 1.07  |
| United Kingdom           | 2000-2011 | -1.64 | -1.78 to -1.50 | 2011-2019 | 0.25  | 0.02 to 0.47   | NA        | NA    | NA             | NA        | NA   | NA            | 2000-2019 | -0.85 | -0.96 to -0.85 |
| United States of America | 2000-2007 | -2.23 | -2.49 to -1.96 | 2007-2013 | -1.11 | -1.55 to -0.67 | 2013-2019 | 0.00  | -0.32 to 0.33  | NA        | NA   | NA            | 2000-2019 | -1.18 | -1.35 to -0.73 |
| Uruguay                  | 2000-2014 | -0.80 | -0.95 to -0.65 | 2014-2019 | 0.29  | -0.41 to 0.98  | NA        | NA    | NA             | NA        | NA   | NA            | 2000-2019 | -0.52 | -0.71 to 0.3   |

AAPC: Average annual percent change; CRC: Colorectal cancer;EAPC: Estimated annual percentage change; NA: Not available.

**Supplementary Table 9: Joinpoint analysis for CRC, age-standardized incidence in 2000–2019 for both genders, 50 years or older.**

| Country             | Trend 1   |       |                | Trend 2   |       |                | Trend 3   |       |               | Trend 4   |      |              | Year      | AAPC  | Range          |
|---------------------|-----------|-------|----------------|-----------|-------|----------------|-----------|-------|---------------|-----------|------|--------------|-----------|-------|----------------|
|                     | Year      | EAPC  | Range          | Year      | EAPC  | Range          | Year      | EAPC  | Range         | Year      | EAPC | Range        |           |       |                |
| Antigua and Barbuda | 2000-2004 | 0.01  | -1.94 to 2.00  | 2004-2007 | 5.31  | -0.58 to 11.54 | 2007-2019 | 1.00  | 0.73 to 1.28  | NA        | NA   | NA           | 2000-2019 | 1.46  | 0.54 to 2.39   |
| Argenti             | 2000-2014 | 0.16  | -0.06 to 0.38  | 2014-2019 | 1.97  | 1.02 to 2.93   | NA        | NA    | NA            | NA        | NA   | NA           | 2000-2019 | 0.63  | 0.36 to 0.91   |
| Australia           | 2000-2009 | -0.89 | -1.35 to -0.43 | 2009-2013 | -3.08 | -5.38 to -0.73 | 2013-2019 | 0.42  | -0.34 to 1.19 | NA        | NA   | NA           | 2000-2019 | -0.94 | -1.48 to -0.41 |
| Austria             | 2000-2008 | -3.28 | -3.66 to -2.90 | 2008-2019 | -1.22 | -1.47 to -0.97 | NA        | NA    | NA            | NA        | NA   | NA           | 2000-2019 | -2.09 | -2.29 to -1.90 |
| Barbados            | 2000-2004 | 4.83  | 3.62 to 6.05   | 2004-2013 | 0.68  | 0.34 to 1.02   | 2013-2017 | -0.05 | -1.41 to 1.34 | 2017-2019 | 2.99 | 0.40 to 5.65 | 2000-2019 | 1.63  | 1.20 to 2.06   |
| Belgium             | 2000-2019 | -0.41 | -0.53 to -0.29 | NA        | NA    | NA             | NA        | NA    | NA            | NA        | NA   | NA           | 2000-2019 | -0.41 | -0.53 to -0.29 |
| Brazil              | 2000-2003 | 2.51  | 1.24 to 3.80   | 2003-2011 | 0.80  | 0.50 to 1.09   | 2011-2019 | 0.03  | -0.17 to 0.23 | NA        | NA   | NA           | 2000-2019 | 0.74  | 0.52 to 0.97   |
| Cada                | 2000-2004 | 1.02  | -0.28 to 2.34  | 2004-2015 | -0.68 | -0.96 to -0.39 | 2015-2019 | 1.04  | 0.00 to 2.08  | NA        | NA   | NA           | 2000-2019 | 0.04  | -0.31 to 0.38  |
| Chile               | 2000-2008 | 1.89  | 1.39 to 2.41   | 2008-2013 | 3.63  | 2.42 to 4.86   | 2013-2019 | 0.50  | -0.04 to 1.05 | NA        | NA   | NA           | 2000-2019 | 1.90  | 1.53 to 2.28   |
| Chi                 | 2000-2004 | 8.60  | 7.87 to 9.34   | 2004-2011 | 4.08  | 3.79 to 4.37   | 2011-2016 | 0.15  | -0.28 to 0.59 | 2016-2019 | 3.44 | 2.81 to 4.07 | 2000-2019 | 3.86  | 3.65 to 4.07   |



|             |           |       |                |           |       |                |           |       |                |           |       |               |           |       |                |
|-------------|-----------|-------|----------------|-----------|-------|----------------|-----------|-------|----------------|-----------|-------|---------------|-----------|-------|----------------|
| Colombia    | 2000-2019 | 0.89  | 0.71 to 1.08   | NA        | NA    | NA             | NA        | NA    | NA             | NA        | NA    | NA            | 2000-2019 | 0.89  | 0.71 to 1.08   |
| Costa Rica  | 2000-2019 | 2.52  | 2.22 to 2.83   | NA        | NA    | NA             | NA        | NA    | NA             | NA        | NA    | NA            | 2000-2019 | 2.52  | 2.22 to 2.83   |
| Croatia     | 2000-2010 | 3.18  | 2.53 to 3.84   | 2010-2019 | 0.06  | -0.59 to 0.72  | NA        | NA    | NA             | NA        | NA    | NA            | 2000-2019 | 1.69  | 1.27 to 2.12   |
| Cuba        | 2000-2012 | 1.24  | 0.80 to 1.69   | 2012-2019 | 2.68  | 1.85 to 3.50   | NA        | NA    | NA             | NA        | NA    | NA            | 2000-2019 | 1.77  | 1.39 to 2.15   |
| Denmark     | 2000-2009 | 0.90  | 0.53 to 1.27   | 2009-2014 | -1.65 | -2.82 to -0.48 | 2014-2019 | 0.44  | -0.38 to 1.28  | NA        | NA    | NA            | 2000-2019 | 0.10  | -0.28 to 0.48  |
| Ecuador     | 2000-2006 | 6.22  | 4.84 to 7.62   | 2006-2019 | 1.71  | 1.42 to 2.00   | NA        | NA    | NA             | NA        | NA    | NA            | 2000-2019 | 3.11  | 2.68 to 3.55   |
| Estonia     | 2000-2008 | 3.13  | 2.47 to 3.80   | 2008-2019 | 0.30  | -0.06 to 0.66  | NA        | NA    | NA             | NA        | NA    | NA            | 2000-2019 | 1.48  | 1.16 to 1.80   |
| Fiji        | 2000-2004 | -0.33 | -1.14 to 0.50  | 2004-2011 | 2.73  | 2.33 to 3.12   | 2011-2019 | 1.19  | 0.99 to 1.39   | NA        | NA    | NA            | 2000-2019 | 1.43  | 1.21 to 1.65   |
| Finland     | 2000-2019 | 0.58  | 0.49 to 0.68   | NA        | NA    | NA             | NA        | NA    | NA             | NA        | NA    | NA            | 2000-2019 | 0.58  | 0.49 to 0.68   |
| France      | 2000-2019 | -0.45 | -0.57 to -0.33 | NA        | NA    | NA             | NA        | NA    | NA             | NA        | NA    | NA            | 2000-2019 | -0.45 | -0.57 to -0.33 |
| Germany     | 2000-2003 | 0.92  | -1.34 to 3.24  | 2003-2014 | -3.38 | -3.75 to -3.02 | 2014-2019 | 0.99  | -0.16 to 2.15  | NA        | NA    | NA            | 2000-2019 | -1.58 | -2.03 to -1.12 |
| Greece      | 2000-2019 | 0.05  | -0.08 to 0.18  | NA        | NA    | NA             | NA        | NA    | NA             | NA        | NA    | NA            | 2000-2019 | 0.05  | -0.08 to 0.18  |
| Greda       | 2000-2010 | 1.78  | 1.49 to 2.06   | 2010-2014 | 0.73  | -0.80 to 2.28  | 2014-2017 | 5.26  | 2.34 to 8.28   | 2017-2019 | -0.21 | -2.80 to 2.45 | 2000-2019 | 1.89  | 1.33 to 2.45   |
| Guatemala   | 2000-2005 | 3.42  | 2.64 to 4.21   | 2005-2008 | 0.84  | -2.03 to 3.79  | 2008-2013 | 2.49  | 1.66 to 3.34   | 2013-2019 | -0.16 | -0.54 to 0.23 | 2000-2019 | 1.63  | 1.14 to 2.12   |
| Guya        | 2000-2002 | -0.29 | -2.07 to 1.53  | 2002-2006 | -2.31 | -3.18 to -1.43 | 2006-2010 | 0.07  | -0.80 to 0.95  | 2010-2019 | 1.62  | 1.48 to 1.76  | 2000-2019 | 0.25  | -0.03 to 0.54  |
| Hungary     | 2000-2019 | 0.08  | -0.06 to 0.21  | NA        | NA    | NA             | NA        | NA    | NA             | NA        | NA    | NA            | 2000-2019 | 0.08  | -0.06 to 0.21  |
| Iceland     | 2000-2003 | 0.83  | -0.46 to 2.14  | 2003-2017 | -1.30 | -1.42 to -1.18 | 2017-2019 | 0.75  | -1.44 to 2.98  | NA        | NA    | NA            | 2000-2019 | -0.75 | -1.04 to -0.46 |
| Israel      | 2000-2007 | -1.36 | -1.82 to -0.89 | 2007-2016 | -2.46 | -2.82 to -2.11 | 2016-2019 | 2.27  | 0.69 to 3.88   | NA        | NA    | NA            | 2000-2019 | -1.32 | -1.63 to -1.01 |
| Italy       | 2000-2003 | 2.78  | 1.19 to 4.39   | 2003-2009 | -0.59 | -1.25 to 0.08  | 2009-2014 | -1.77 | -2.70 to -0.83 | 2014-2019 | -0.32 | -0.98 to 0.34 | 2000-2019 | -0.31 | -0.69 to 0.08  |
| Japan       | 2000-2014 | 0.40  | 0.24 to 0.56   | 2014-2019 | -0.62 | -1.35 to 0.11  | NA        | NA    | NA             | NA        | NA    | NA            | 2000-2019 | 0.13  | -0.08 to 0.34  |
| Kuwait      | 2000-2004 | 0.65  | -1.33 to 2.67  | 2004-2008 | 8.67  | 5.76 to 11.65  | 2008-2011 | -5.59 | -9.91 to -1.05 | 2011-2019 | 1.82  | 1.38 to 2.25  | 2000-2019 | 1.75  | 0.84 to 2.67   |
| Kyrgyzstan  | 2000-2006 | 0.02  | -0.58 to 0.62  | 2006-2009 | -1.97 | -5.45 to 1.64  | 2009-2019 | 0.25  | -0.01 to 0.50  | NA        | NA    | NA            | 2000-2019 | -0.18 | -0.73 to 0.38  |
| Latvia      | 2000-2007 | 3.16  | 2.39 to 3.93   | 2007-2019 | -0.59 | -0.91 to -0.27 | NA        | NA    | NA             | NA        | NA    | NA            | 2000-2019 | 0.77  | 0.46 to 1.09   |
| Lithuania   | 2000-2008 | 1.96  | 1.08 to 2.84   | 2008-2019 | -0.73 | -1.25 to -0.22 | NA        | NA    | NA             | NA        | NA    | NA            | 2000-2019 | 0.39  | -0.04 to 0.82  |
| Luxembourg  | 2000-2005 | 0.60  | 0.03 to 1.17   | 2005-2013 | -1.96 | -2.29 to -1.64 | 2013-2016 | -5.62 | -7.95 to -3.23 | 2016-2019 | -0.07 | -1.29 to 1.16 | 2000-2019 | -1.59 | -2.00 to -1.18 |
| g           |           |       |                |           |       |                |           |       |                |           |       |               |           |       |                |
| Malta       | 2000-2003 | 1.97  | 0.91 to 3.05   | 2003-2009 | -0.14 | -0.57 to 0.29  | 2009-2015 | -0.80 | -1.19 to -0.40 | 2015-2019 | 0.69  | 0.14 to 1.23  | 2000-2019 | 0.15  | -0.08 to 0.39  |
| Mauritius   | 2000-2005 | 3.08  | 2.03 to 4.14   | 2005-2011 | 0.15  | -0.72 to 1.03  | 2011-2019 | 2.04  | 1.68 to 2.40   | NA        | NA    | NA            | 2000-2019 | 1.71  | 1.33 to 2.09   |
| Mexico      | 2000-2019 | 2.21  | 2.07 to 2.35   | NA        | NA    | NA             | NA        | NA    | NA             | NA        | NA    | NA            | 2000-2019 | 2.21  | 2.07 to 2.35   |
| Netherlands | 2000-2003 | -0.82 | -2.72 to 1.11  | 2003-2009 | 2.54  | 1.73 to 3.36   | 2009-2019 | -0.20 | -0.44 to 0.04  | NA        | NA    | NA            | 2000-2019 | 0.56  | 0.18 to 0.94   |

|                          |           |       |                |           |       |                |           |       |                |           |       |                |           |       |                |
|--------------------------|-----------|-------|----------------|-----------|-------|----------------|-----------|-------|----------------|-----------|-------|----------------|-----------|-------|----------------|
| New Zealand              | 2000-2014 | -1.09 | -1.32 to -0.86 | 2014-2019 | 1.01  | 0.02 to 2.00   | NA        | NA    | NA             | NA        | NA    | NA             | 2000-2019 | -0.54 | -0.83 to -0.26 |
| Norway                   | 2000-2011 | 0.90  | 0.64 to 1.15   | 2011-2019 | -1.61 | -1.97 to -1.26 | NA        | NA    | NA             | NA        | NA    | NA             | 2000-2019 | -0.17 | -0.36 to 0.02  |
| Pama                     | 2000-2003 | 2.50  | 0.06 to 5.00   | 2003-2007 | -0.19 | -2.36 to 2.02  | 2007-2019 | 1.94  | 1.73 to 2.15   | NA        | NA    | NA             | 2000-2019 | 1.58  | 1.02 to 2.14   |
| Philippines              | 2000-2006 | -0.66 | -1.06 to -0.26 | 2006-2014 | 3.02  | 2.74 to 3.29   | 2014-2019 | 1.00  | 0.63 to 1.37   | NA        | NA    | NA             | 2000-2019 | 1.31  | 1.13 to 1.49   |
| Poland                   | 2000-2009 | 1.18  | 0.95 to 1.41   | 2009-2019 | 0.29  | 0.13 to 0.46   | NA        | NA    | NA             | NA        | NA    | NA             | 2000-2019 | 0.71  | 0.58 to 0.84   |
| Puerto Rico              | 2000-2005 | 2.98  | 1.04 to 4.95   | 2005-2019 | 0.27  | -0.07 to 0.62  | NA        | NA    | NA             | NA        | NA    | NA             | 2000-2019 | 0.98  | 0.46 to 1.50   |
| Republic of Korea        | 2000-2005 | 4.73  | 4.14 to 5.31   | 2005-2010 | 2.91  | 2.25 to 3.57   | 2010-2016 | -2.23 | -2.61 to -1.83 | 2016-2019 | 1.14  | 0.32 to 1.97   | 2000-2019 | 1.45  | 1.20 to 1.70   |
| Republic of Moldova      | 2000-2009 | 5.92  | 5.13 to 6.72   | 2009-2012 | -0.80 | -7.44 to 6.30  | 2012-2015 | 4.39  | -2.43 to 11.69 | 2015-2019 | -3.36 | -5.31 to -1.37 | 2000-2019 | 2.59  | 1.15 to 4.04   |
| Romania                  | 2000-2019 | 2.66  | 2.47 to 2.85   | NA        | NA    | NA             | NA        | NA    | NA             | NA        | NA    | NA             | 2000-2019 | 2.66  | 2.47 to 2.85   |
| Saint Lucia              | 2000-2004 | 0.43  | -1.15 to 2.04  | 2004-2011 | -1.13 | -1.90 to -0.36 | 2011-2017 | 4.02  | 3.11 to 4.93   | 2017-2019 | 1.61  | -1.77 to 5.10  | 2000-2019 | 1.09  | 0.54 to 1.64   |
| Serbia                   | 2000-2009 | 3.28  | 2.88 to 3.69   | 2009-2019 | 0.43  | 0.13 to 0.72   | NA        | NA    | NA             | NA        | NA    | NA             | 2000-2019 | 1.77  | 1.54 to 1.99   |
| Singapore                | 2000-2012 | -0.56 | -0.86 to -0.26 | 2012-2019 | -1.25 | -1.78 to -0.71 | NA        | NA    | NA             | NA        | NA    | NA             | 2000-2019 | -0.81 | -1.07 to -0.56 |
| Slovakia                 | 2000-2004 | -2.52 | -3.85 to -1.16 | 2004-2011 | 3.27  | 2.57 to 3.98   | 2011-2019 | 0.52  | 0.14 to 0.90   | NA        | NA    | NA             | 2000-2019 | 0.87  | 0.49 to 1.25   |
| Slovenia                 | 2000-2009 | 1.21  | 0.74 to 1.68   | 2009-2014 | -2.66 | -4.10 to -1.20 | 2014-2019 | 0.29  | -0.74 to 1.34  | NA        | NA    | NA             | 2000-2019 | -0.06 | -0.54 to 0.41  |
| Spain                    | 2000-2011 | 2.04  | 1.80 to 2.28   | 2011-2019 | -0.01 | -0.34 to 0.32  | NA        | NA    | NA             | NA        | NA    | NA             | 2000-2019 | 1.17  | 0.99 to 1.35   |
| Sweden                   | 2000-2004 | 1.53  | 0.76 to 2.30   | 2004-2008 | -0.20 | -1.33 to 0.94  | 2008-2014 | -2.10 | -2.60 to -1.61 | 2014-2019 | 0.06  | -0.44 to 0.56  | 2000-2019 | -0.38 | -0.69 to -0.07 |
| Switzerland              | 2000-2019 | -1.11 | -1.19 to -1.02 | NA        | NA    | NA             | NA        | NA    | NA             | NA        | NA    | NA             | 2000-2019 | -1.11 | -1.19 to -1.02 |
| Trinidad and Tobago      | 2000-2008 | 1.13  | 0.45 to 1.81   | 2008-2012 | -2.02 | -4.65 to 0.69  | 2012-2019 | 1.19  | 0.53 to 1.86   | NA        | NA    | NA             | 2000-2019 | 0.48  | -0.13 to 1.10  |
| United Kingdom           | 2000-2014 | -0.41 | -0.56 to -0.27 | 2014-2019 | 0.96  | 0.30 to 1.61   | NA        | NA    | NA             | NA        | NA    | NA             | 2000-2019 | -0.05 | -0.24 to 0.13  |
| United States of America | 2000-2002 | -0.98 | -3.27 to 1.36  | 2002-2006 | -3.00 | -4.12 to -1.86 | 2006-2015 | -0.54 | -0.78 to -0.29 | 2015-2019 | 0.56  | -0.08 to 1.21  | 2000-2019 | -0.88 | -1.21 to -0.54 |
| Uruguay                  | 2000-2019 | 0.03  | -0.12 to 0.18  | NA        | NA    | NA             | NA        | NA    | NA             | NA        | NA    | NA             | 2000-2019 | 0.03  | -0.12 to 0.18  |

AAPC: Average annual percent change; CRC: Colorectal cancer;EAPC: Estimated annual percentage change; NA: Not available.

**Supplementary Table 10: Joinpoint analysis for CRC, age-standardized mortality in 2000–2019 for both genders, 50 years or older.**

| Country             | Trend 1   |       |                | Trend 2   |       |                | Trend 3   |       |                | Trend 4   |       |               | Year      | AAPC  | Range          |
|---------------------|-----------|-------|----------------|-----------|-------|----------------|-----------|-------|----------------|-----------|-------|---------------|-----------|-------|----------------|
|                     | Year      | EAPC  | Range          | Year      | EAPC  | Range          | Year      | EAPC  | Range          | Year      | EAPC  | Range         |           |       |                |
| Antigua and Barbuda | 2000-2019 | 0.98  | 0.72 to 1.23   | NA        | NA    | NA             | NA        | NA    | NA             | NA        | NA    | NA            | 2000-2019 | 0.98  | 0.72 to 1.23   |
| Argenti             | 2000-2003 | 0.68  | -0.64 to 2.02  | 2003-2014 | -0.56 | -0.76 to -0.37 | 2014-2017 | 2.04  | -0.33 to 4.46  | 2017-2019 | -0.38 | -2.60 to 1.89 | 2000-2019 | 0.06  | -0.37 to 0.49  |
| Australia           | 2000-2003 | -4.19 | -5.83 to -2.52 | 2003-2013 | -2.05 | -2.35 to -1.74 | 2013-2017 | -0.40 | -2.00 to 1.22  | 2017-2019 | 2.19  | -0.87 to 5.34 | 2000-2019 | -1.61 | -2.09 to -1.12 |
| Austria             | 2000-2008 | -4.02 | -4.25 to -3.80 | 2008-2017 | -1.96 | -2.21 to -1.72 | 2017-2019 | -0.37 | -2.59 to 1.91  | NA        | NA    | NA            | 2000-2019 | -2.67 | -2.92 to -2.42 |
| Barbados            | 2000-2004 | 3.93  | 2.85 to 5.03   | 2004-2017 | -0.16 | -0.32 to 0.01  | 2017-2019 | 2.87  | 0.38 to 5.43   | NA        | NA    | NA            | 2000-2019 | 1.01  | 0.68 to 1.34   |
| Belgium             | 2000-2008 | -2.18 | -2.48 to -1.88 | 2008-2012 | 0.03  | -1.36 to 1.44  | 2012-2016 | -1.90 | -3.24 to -0.55 | 2016-2019 | 0.68  | -0.66 to 2.04 | 2000-2019 | -1.21 | -1.62 to -0.80 |
| Brazil              | 2000-2004 | 1.17  | 0.42 to 1.93   | 2004-2016 | -0.08 | -0.21 to 0.06  | 2016-2019 | -1.12 | -1.98 to -0.25 | NA        | NA    | NA            | 2000-2019 | 0.02  | -0.18 to 0.22  |
| Cada                | 2000-2016 | -0.99 | -1.09 to -0.89 | 2016-2019 | 1.18  | 0.00 to 2.38   | NA        | NA    | NA             | NA        | NA    | NA            | 2000-2019 | -0.65 | -0.84 to -0.46 |
| Chile               | 2000-2008 | 0.57  | 0.25 to 0.89   | 2008-2013 | 1.97  | 1.17 to 2.78   | 2013-2019 | -0.11 | -0.48 to 0.26  | NA        | NA    | NA            | 2000-2019 | 0.72  | 0.47 to 0.97   |
| Chi                 | 2000-2004 | 5.59  | 5.05 to 6.15   | 2004-2011 | 0.95  | 0.71 to 1.18   | 2011-2016 | -1.56 | -1.94 to -1.17 | 2016-2019 | 1.30  | 0.73 to 1.88  | 2000-2019 | 1.29  | 1.12 to 1.46   |
| Colombia            | 2000-2019 | -0.21 | -0.40 to -0.02 | NA        | NA    | NA             | NA        | NA    | NA             | NA        | NA    | NA            | 2000-2019 | -0.21 | -0.40 to -0.02 |
| Costa Rica          | 2000-2019 | 1.75  | 1.47 to 2.03   | NA        | NA    | NA             | NA        | NA    | NA             | NA        | NA    | NA            | 2000-2019 | 1.75  | 1.47 to 2.03   |
| Croatia             | 2000-2010 | 2.18  | 1.61 to 2.75   | 2010-2019 | -0.86 | -1.45 to -0.27 | NA        | NA    | NA             | NA        | NA    | NA            | 2000-2019 | 0.73  | 0.35 to 1.10   |
| Cuba                | 2000-2012 | 0.37  | -0.03 to 0.78  | 2012-2019 | 1.95  | 1.16 to 2.74   | NA        | NA    | NA             | NA        | NA    | NA            | 2000-2019 | 0.95  | 0.60 to 1.30   |
| Denmark             | 2000-2010 | -1.30 | -1.41 to -1.19 | 2010-2014 | -2.68 | -3.35 to -2.00 | 2014-2019 | -0.13 | -0.44 to 0.17  | NA        | NA    | NA            | 2000-2019 | -1.29 | -1.44 to -1.13 |
| Ecuador             | 2000-2006 | 5.18  | 4.24 to 6.13   | 2006-2014 | 1.28  | 0.73 to 1.84   | 2014-2019 | 0.10  | -0.70 to 0.90  | NA        | NA    | NA            | 2000-2019 | 2.18  | 1.79 to 2.57   |
| Estonia             | 2000-2007 | 1.16  | 0.46 to 1.86   | 2007-2019 | -1.11 | -1.40 to -0.82 | NA        | NA    | NA             | NA        | NA    | NA            | 2000-2019 | -0.28 | -0.57 to 0.01  |
| Fiji                | 2000-2004 | -0.36 | -1.19 to 0.48  | 2004-2012 | 2.34  | 2.02 to 2.65   | 2012-2019 | 0.77  | 0.51 to 1.02   | NA        | NA    | NA            | 2000-2019 | 1.19  | 0.97 to 1.40   |
| Finland             | 2000-2008 | -0.93 | -1.08 to -0.79 | 2008-2019 | -0.18 | -0.26 to -0.10 | NA        | NA    | NA             | NA        | NA    | NA            | 2000-2019 | -0.50 | -0.57 to -0.43 |
| France              | 2000-2002 | -0.85 | -2.96 to 1.31  | 2002-2005 | -3.00 | -5.08 to -0.88 | 2005-2014 | -1.55 | -1.78 to -1.31 | 2014-2019 | -0.19 | -0.65 to 0.28 | 2000-2019 | -1.35 | -1.73 to -0.97 |
| Germany             | 2000-2003 | 0.30  | -1.40 to 2.03  | 2003-2007 | -3.55 | -5.19 to -1.88 | 2007-2014 | -5.33 | -5.95 to -4.70 | 2014-2019 | 0.65  | -0.28 to 1.59 | 2000-2019 | -2.53 | -3.00 to -2.04 |
| Greece              | 2000-2010 | -1.71 | -1.92 to -1.50 | 2010-2019 | 0.63  | 0.38 to 0.88   | NA        | NA    | NA             | NA        | NA    | NA            | 2000-2019 | -0.61 | -0.76 to -0.46 |

|             |           |       |                |           |       |                |           |       |                |           |       |                |           |       |                |
|-------------|-----------|-------|----------------|-----------|-------|----------------|-----------|-------|----------------|-----------|-------|----------------|-----------|-------|----------------|
| Greda       | 2000-2010 | 1.46  | 1.13 to 1.78   | 2010-2014 | 0.16  | -1.62 to 1.97  | 2014-2017 | 4.87  | 1.43 to 8.42   | 2017-2019 | -1.57 | -4.61 to 1.57  | 2000-2019 | 1.39  | 0.74 to 2.05   |
| Guatemala   | 2000-2005 | 2.52  | 1.92 to 3.11   | 2005-2008 | 0.38  | -1.82 to 2.64  | 2008-2014 | 1.69  | 1.24 to 2.14   | 2014-2019 | -0.69 | -1.08 to -0.30 | 2000-2019 | 1.07  | 0.70 to 1.44   |
| Guya        | 2000-2008 | -1.53 | -1.82 to -1.23 | 2008-2019 | 1.06  | 0.90 to 1.22   | NA        | NA    | NA             | NA        | NA    | NA             | 2000-2019 | -0.04 | -0.18 to 0.10  |
| Hungary     | 2000-2019 | -0.68 | -0.80 to -0.57 | NA        | NA    | NA             | NA        | NA    | NA             | NA        | NA    | NA             | 2000-2019 | -0.68 | -0.80 to -0.57 |
| Iceland     | 2000-2002 | 0.17  | -2.92 to 3.36  | 2002-2017 | -1.57 | -1.71 to -1.44 | 2017-2019 | 0.08  | -2.63 to 2.86  | NA        | NA    | NA             | 2000-2019 | -1.22 | -1.62 to -0.82 |
| Israel      | 2000-2016 | -3.02 | -3.12 to -2.93 | 2016-2019 | 1.93  | 0.70 to 3.17   | NA        | NA    | NA             | NA        | NA    | NA             | 2000-2019 | -2.26 | -2.44 to -2.07 |
| Italy       | 2000-2003 | -0.24 | -1.42 to 0.96  | 2003-2016 | -1.57 | -1.71 to -1.42 | 2016-2019 | 0.26  | -0.92 to 1.46  | NA        | NA    | NA             | 2000-2019 | -1.07 | -1.32 to -0.82 |
| Japan       | 2000-2009 | -0.88 | -1.07 to -0.70 | 2009-2012 | 0.37  | -1.59 to 2.37  | 2012-2019 | -0.87 | -1.14 to       | NA        | NA    | NA             | 2000-2019 | -0.68 | -0.98 to -0.38 |
|             |           |       |                |           |       |                |           |       | -0.61          |           |       |                |           |       |                |
| Kuwait      | 2000-2005 | 1.52  | -0.13 to 3.21  | 2005-2008 | 7.73  | 1.11 to 14.79  | 2008-2011 | -6.53 | -11.75 to      | 2011-2019 | 0.45  | -0.10 to 1.00  | 2000-2019 | 0.70  | -0.55 to 1.96  |
|             |           |       |                |           |       |                |           |       | -1.01          |           |       |                |           |       |                |
| Kyrgyzstan  | 2000-2006 | -0.14 | -0.80 to 0.53  | 2006-2009 | -2.76 | -6.61 to 1.24  | 2009-2019 | -0.32 | -0.62 to       | NA        | NA    | NA             | 2000-2019 | -0.65 | -1.27 to -0.04 |
|             |           |       |                |           |       |                |           |       | -0.03          |           |       |                |           |       |                |
| Latvia      | 2000-2007 | 2.06  | 1.30 to 2.83   | 2007-2019 | -1.52 | -1.85 to -1.19 | NA        | NA    | NA             | NA        | NA    | NA             | 2000-2019 | -0.22 | -0.54 to 0.10  |
| Lithuania   | 2000-2008 | 1.34  | 0.61 to 2.07   | 2008-2019 | -1.38 | -1.83 to -0.94 | NA        | NA    | NA             | NA        | NA    | NA             | 2000-2019 | -0.25 | -0.61 to 0.12  |
| Luxembourg  | 2000-2006 | -1.73 | -2.01 to -1.46 | 2006-2013 | -2.77 | -3.05 to -2.49 | 2013-2016 | -4.76 | -6.38 to -3.11 | 2016-2019 | 0.13  | -0.71 to 0.97  | 2000-2019 | -2.31 | -2.59 to -2.03 |
| g           |           |       |                |           |       |                |           |       |                |           |       |                |           |       |                |
| Malta       | 2000-2002 | 1.21  | -0.95 to 3.41  | 2002-2012 | -1.00 | -1.18 to -0.82 | 2012-2015 | -2.08 | -3.90 to       | 2015-2019 | -0.36 | -0.93 to 0.22  | 2000-2019 | -0.81 | -1.15 to -0.46 |
|             |           |       |                |           |       |                |           |       | -0.24          |           |       |                |           |       |                |
| Mauritius   | 2000-2005 | 3.14  | 1.92 to 4.37   | 2005-2011 | -0.32 | -1.34 to 0.71  | 2011-2019 | 1.47  | 1.04 to 1.90   | NA        | NA    | NA             | 2000-2019 | 1.33  | 0.89 to 1.78   |
| Mexico      | 2000-2019 | 1.61  | 1.49 to 1.73   | NA        | NA    | NA             | NA        | NA    | NA             | NA        | NA    | NA             | 2000-2019 | 1.61  | 1.49 to 1.73   |
| Netherlands | 2000-2003 | -3.08 | -4.44 to -1.71 | 2003-2008 | 1.56  | 0.69 to 2.44   | 2008-2019 | -0.59 | -0.75 to       | NA        | NA    | NA             | 2000-2019 | -0.43 | -0.72 to -0.13 |
|             |           |       |                |           |       |                |           |       | -0.42          |           |       |                |           |       |                |
| New Zealand | 2000-2016 | -1.76 | -1.94 to -1.58 | 2016-2019 | 1.30  | -0.86 to 3.50  | NA        | NA    | NA             | NA        | NA    | NA             | 2000-2019 | -1.28 | -1.62 to -0.94 |
| Norway      | 2000-2012 | -0.62 | -0.80 to -0.44 | 2012-2019 | -1.70 | -2.07 to -1.32 | NA        | NA    | NA             | NA        | NA    | NA             | 2000-2019 | -1.02 | -1.19 to -0.85 |
| Pama        | 2000-2003 | 2.62  | 1.13 to 4.13   | 2003-2008 | 0.20  | -0.63 to 1.03  | 2008-2014 | 1.61  | 1.09 to 2.13   | 2014-2019 | -0.21 | -0.66 to 0.24  | 2000-2019 | 0.91  | 0.59 to 1.24   |
| Philippines | 2000-2004 | -1.05 | -1.58 to -0.51 | 2004-2007 | 0.80  | -0.81 to 2.44  | 2007-2015 | 2.40  | 2.22 to 2.59   | 2015-2019 | 0.45  | 0.08 to 0.82   | 2000-2019 | 1.00  | 0.74 to 1.27   |
| Poland      | 2000-2019 | -0.15 | -0.22 to -0.09 | NA        | NA    | NA             | NA        | NA    | NA             | NA        | NA    | NA             | 2000-2019 | -0.15 | -0.22 to -0.09 |
| Puerto Rico | 2000-2019 | -0.37 | -0.61 to -0.14 | NA        | NA    | NA             | NA        | NA    | NA             | NA        | NA    | NA             | 2000-2019 | -0.37 | -0.61 to -0.14 |

|                          |           |       |                |           |       |                |           |       |                |           |       |                |           |       |                |
|--------------------------|-----------|-------|----------------|-----------|-------|----------------|-----------|-------|----------------|-----------|-------|----------------|-----------|-------|----------------|
| Republic of Korea        | 2000-2008 | 0.80  | 0.63 to 0.97   | 2008-2011 | -0.40 | -1.71 to 0.93  | 2011-2016 | -3.03 | -3.41 to -2.64 | 2016-2019 | 0.70  | 0.12 to 1.29   | 2000-2019 | -0.42 | -0.65 to -0.20 |
| Republic of Moldova      | 2000-2009 | 5.05  | 4.02 to 6.10   | 2009-2016 | 0.26  | -1.26 to 1.80  | 2016-2019 | -4.64 | -8.91 to -0.18 | NA        | NA    | NA             | 2000-2019 | 1.69  | 0.76 to 2.64   |
| Romania                  | 2000-2019 | 1.59  | 1.42 to 1.75   | NA        | NA    | NA             | NA        | NA    | NA             | NA        | NA    | NA             | 2000-2019 | 1.59  | 1.42 to 1.75   |
| Saint Lucia              | 2000-2004 | -0.07 | -1.60 to 1.49  | 2004-2011 | -1.99 | -2.75 to -1.22 | 2011-2017 | 4.09  | 3.17 to 5.02   | 2017-2019 | 0.70  | -2.72 to 4.24  | 2000-2019 | 0.59  | 0.04 to 1.14   |
| Serbia                   | 2000-2002 | 1.02  | -2.13 to 4.27  | 2002-2005 | 3.39  | 0.33 to 6.54   | 2005-2009 | 0.66  | -0.77 to 2.10  | 2009-2019 | -0.49 | -0.70 to -0.27 | 2000-2019 | 0.51  | -0.06 to 1.09  |
| Singapore                | 2000-2005 | -3.04 | -3.62 to -2.45 | 2005-2017 | -2.23 | -2.39 to -2.07 | 2017-2019 | -0.06 | -2.11 to 2.03  | NA        | NA    | NA             | 2000-2019 | -2.22 | -2.47 to -1.96 |
| Slovakia                 | 2000-2004 | -3.40 | -4.50 to -2.29 | 2004-2012 | 1.59  | 1.12 to 2.05   | 2012-2019 | -0.69 | -1.09 to -0.28 | NA        | NA    | NA             | 2000-2019 | -0.32 | -0.63 to -0.01 |
| Slovenia                 | 2000-2010 | -0.76 | -1.12 to -0.40 | 2010-2014 | -4.22 | -6.38 to -2.02 | 2014-2019 | -0.22 | -1.22 to 0.79  | NA        | NA    | NA             | 2000-2019 | -1.36 | -1.87 to -0.84 |
| Spain                    | 2000-2006 | 0.09  | -0.21 to 0.39  | 2006-2011 | 0.87  | 0.33 to 1.41   | 2011-2019 | -0.43 | -0.61 to -0.26 | NA        | NA    | NA             | 2000-2019 | 0.07  | -0.09 to 0.24  |
| Sweden                   | 2000-2006 | 0.20  | 0.03 to 0.36   | 2006-2009 | -1.47 | -2.40 to -0.53 | 2009-2014 | -2.47 | -2.77 to -2.18 | 2014-2019 | -0.12 | -0.33 to 0.09  | 2000-2019 | -0.86 | -1.02 to -0.70 |
| Switzerland              | 2000-2005 | -2.47 | -2.78 to -2.15 | 2005-2014 | -1.27 | -1.42 to -1.12 | 2014-2019 | -0.73 | -1.03 to -0.43 | NA        | NA    | NA             | 2000-2019 | -1.45 | -1.57 to -1.32 |
| Trinidad and Tobago      | 2000-2008 | 0.04  | -0.65 to 0.73  | 2008-2012 | -2.39 | -5.18 to 0.48  | 2012-2019 | 0.88  | 0.18 to 1.59   | NA        | NA    | NA             | 2000-2019 | -0.17 | -0.82 to 0.48  |
| United Kingdom           | 2000-2011 | -1.78 | -1.90 to -1.66 | 2011-2017 | -0.32 | -0.71 to 0.08  | 2017-2019 | 1.58  | -0.13 to 3.32  | NA        | NA    | NA             | 2000-2019 | -0.97 | -1.17 to -0.77 |
| United States of America | 2000-2007 | -2.50 | -2.76 to -2.23 | 2007-2014 | -1.05 | -1.38 to -0.73 | 2014-2019 | 0.49  | 0.08 to 0.89   | NA        | NA    | NA             | 2000-2019 | -1.19 | -1.35 to -1.02 |
| Uruguay                  | 2000-2019 | -0.48 | -0.61 to -0.35 | NA        | NA    | NA             | NA        | NA    | NA             | NA        | NA    | NA             | 2000-2019 | -0.48 | -0.61 to -0.35 |

AAPC: Average annual percent change; CRC: Colorectal cancer;EAPC: Estimated annual percentage change; NA: Not available.

**Supplementary Table 11: Joinpoint analysis for CRC, age-standardized incidence in 2000–2019 for both genders, younger than 50 years.**

| Country | Trend 1 |            | Trend 2 |            | Trend 3 |            | Trend 4 |            | Year | AAPC Range |
|---------|---------|------------|---------|------------|---------|------------|---------|------------|------|------------|
|         | Year    | EAPC Range |      |            |

|                     |           |       |                |           |       |                |           |       |                |           |       |               |           |       |                |
|---------------------|-----------|-------|----------------|-----------|-------|----------------|-----------|-------|----------------|-----------|-------|---------------|-----------|-------|----------------|
| Antigua and Barbuda | 2000-2002 | 0.03  | -1.44 to 1.51  | 2002-2010 | 1.69  | 1.51 to 1.87   | 2010-2015 | 0.20  | -0.19 to 0.59  | 2015-2019 | 1.60  | 1.22 to 1.98  | 2000-2019 | 1.10  | 0.91 to 1.29   |
| Argentina           | 2000-2019 | 0.83  | 0.66 to 1.01   | NA        | NA    | NA             | NA        | NA    | NA             | NA        | NA    | NA            | 2000-2019 | 0.83  | 0.66 to 1.01   |
| Australia           | 2000-2003 | -1.34 | -5.12 to 2.59  | 2003-2019 | 0.91  | 0.63 to 1.19   | NA        | NA    | NA             | NA        | NA    | NA            | 2000-2019 | 0.55  | -0.06 to 1.16  |
| Austria             | 2000-2007 | -5.73 | -6.33 to -5.13 | 2007-2013 | -2.37 | -3.53 to -1.20 | 2013-2019 | 0.05  | -0.89 to 1.00  | NA        | NA    | NA            | 2000-2019 | -2.88 | -3.34 to -2.41 |
| Barbados            | 2000-2007 | 2.26  | 1.67 to 2.85   | 2007-2019 | -0.24 | -0.48 to -0.00 | NA        | NA    | NA             | NA        | NA    | NA            | 2000-2019 | 0.67  | 0.43 to 0.91   |
| Belgium             | 2000-2007 | 0.16  | -0.41 to 0.74  | 2007-2014 | -2.08 | -2.80 to -1.35 | 2014-2019 | 0.42  | -0.59 to 1.44  | NA        | NA    | NA            | 2000-2019 | -0.60 | -0.99 to -0.21 |
| Brazil              | 2000-2011 | 1.36  | 1.17 to 1.56   | 2011-2019 | -0.14 | -0.41 to 0.13  | NA        | NA    | NA             | NA        | NA    | NA            | 2000-2019 | 0.73  | 0.58 to 0.88   |
| Cada                | 2000-2008 | 2.01  | 1.65 to 2.36   | 2008-2011 | -1.41 | -4.38 to 1.64  | 2011-2017 | 1.41  | 0.71 to 2.11   | 2017-2019 | -2.01 | -4.99 to 1.07 | 2000-2019 | 0.84  | 0.29 to 1.40   |
| Chile               | 2000-2006 | 2.34  | 1.09 to 3.61   | 2006-2015 | 4.29  | 3.62 to 4.97   | 2015-2019 | -0.68 | -2.35 to 1.03  | NA        | NA    | NA            | 2000-2019 | 2.61  | 2.05 to 3.18   |
| Chi                 | 2000-2007 | 4.07  | 3.59 to 4.55   | 2007-2010 | 6.21  | 3.17 to 9.34   | 2010-2016 | 1.34  | 0.75 to 1.94   | 2016-2019 | 4.65  | 3.33 to 5.99  | 2000-2019 | 3.62  | 3.12 to 4.13   |
| Colombia            | 2000-2010 | 2.78  | 2.15 to 3.41   | 2010-2019 | 1.44  | 0.83 to 2.06   | NA        | NA    | NA             | NA        | NA    | NA            | 2000-2019 | 2.14  | 1.74 to 2.55   |
| Costa Rica          | 2000-2019 | 3.33  | 2.93 to 3.73   | NA        | NA    | NA             | NA        | NA    | NA             | NA        | NA    | NA            | 2000-2019 | 3.33  | 2.93 to 3.73   |
| Croatia             | 2000-2008 | 1.47  | 0.69 to 2.26   | 2008-2019 | -0.47 | -0.96 to 0.02  | NA        | NA    | NA             | NA        | NA    | NA            | 2000-2019 | 0.34  | -0.05 to 0.74  |
| Cuba                | 2000-2011 | -0.16 | -0.47 to 0.16  | 2011-2019 | 2.79  | 2.30 to 3.29   | NA        | NA    | NA             | NA        | NA    | NA            | 2000-2019 | 1.08  | 0.82 to 1.33   |
| Denmark             | 2000-2009 | 0.51  | -0.07 to 1.10  | 2009-2014 | -3.73 | -5.67 to -1.75 | 2014-2019 | 1.29  | -0.23 to 2.84  | NA        | NA    | NA            | 2000-2019 | -0.42 | -1.06 to 0.23  |
| Ecuador             | 2000-2005 | 7.93  | 5.93 to 9.96   | 2005-2019 | 0.88  | 0.58 to 1.18   | NA        | NA    | NA             | NA        | NA    | NA            | 2000-2019 | 2.69  | 2.18 to 3.19   |
| Estonia             | 2000-2019 | 0.14  | -0.19 to 0.47  | NA        | NA    | NA             | NA        | NA    | NA             | NA        | NA    | NA            | 2000-2019 | 0.14  | -0.19 to 0.47  |
| Fiji                | 2000-2003 | -2.37 | -3.83 to -0.89 | 2003-2006 | 4.62  | 1.65 to 7.68   | 2006-2019 | 1.91  | 1.77 to 2.04   | NA        | NA    | NA            | 2000-2019 | 1.64  | 1.16 to 2.12   |
| Finland             | 2000-2008 | 1.38  | 0.36 to 2.40   | 2008-2019 | -1.40 | -2.03 to -0.77 | NA        | NA    | NA             | NA        | NA    | NA            | 2000-2019 | -0.24 | -0.76 to 0.28  |
| France              | 2000-2019 | -0.36 | -0.54 to -0.17 | NA        | NA    | NA             | NA        | NA    | NA             | NA        | NA    | NA            | 2000-2019 | -0.36 | -0.54 to -0.17 |
| Germany             | 2000-2003 | 3.36  | 1.43 to 5.32   | 2003-2008 | -0.80 | -1.94 to 0.34  | 2008-2014 | -5.91 | -6.76 to -5.04 | 2014-2019 | 1.78  | 0.75 to 2.82  | 2000-2019 | -1.14 | -1.64 to -0.65 |
| Greece              | 2000-2009 | 1.64  | 1.17 to 2.11   | 2009-2015 | -1.20 | -2.29 to -0.10 | 2015-2019 | 1.29  | -0.32 to 2.93  | NA        | NA    | NA            | 2000-2019 | 0.66  | 0.18 to 1.15   |
| Greda               | 2000-2004 | 3.31  | 2.15 to 4.48   | 2004-2013 | 0.27  | -0.08 to 0.62  | 2013-2019 | 1.26  | 0.73 to 1.78   | NA        | NA    | NA            | 2000-2019 | 1.21  | 0.91 to 1.52   |
| Guatemala           | 2000-2010 | 2.51  | 1.77 to 3.25   | 2010-2019 | -0.02 | -0.66 to 0.63  | NA        | NA    | NA             | NA        | NA    | NA            | 2000-2019 | 1.30  | 0.85 to 1.76   |
| Guya                | 2000-2007 | -0.36 | -1.04 to 0.33  | 2007-2019 | 1.64  | 1.35 to 1.93   | NA        | NA    | NA             | NA        | NA    | NA            | 2000-2019 | 0.90  | 0.61 to 1.19   |

|             |           |       |                |           |       |                |           |       |                 |           |      |               |           |       |                |
|-------------|-----------|-------|----------------|-----------|-------|----------------|-----------|-------|-----------------|-----------|------|---------------|-----------|-------|----------------|
| Hungary     | 2000-2007 | 0.61  | 0.00 to 1.21   | 2007-2013 | -4.27 | -5.33 to -3.20 | 2013-2017 | -1.26 | -3.80 to 1.35   | 2017-2019 | 4.42 | -0.71 to 9.83 | 2000-2019 | -0.96 | -1.71 to -0.21 |
| Iceland     | 2000-2008 | -1.15 | -1.31 to -0.99 | 2008-2017 | -0.67 | -0.83 to -0.50 | 2017-2019 | 1.02  | -0.49 to 2.55   | NA        | NA   | NA            | 2000-2019 | -0.69 | -0.86 to -0.53 |
| Israel      | 2000-2008 | 0.31  | -0.19 to 0.82  | 2008-2012 | -4.27 | -6.40 to -2.09 | 2012-2019 | 1.11  | 0.53 to 1.70    | NA        | NA   | NA            | 2000-2019 | -0.38 | -0.88 to 0.12  |
| Italy       | 2000-2003 | 1.02  | -0.97 to 3.06  | 2003-2016 | -1.33 | -1.56 to -1.10 | 2016-2019 | 0.43  | -1.61 to 2.50   | NA        | NA   | NA            | 2000-2019 | -0.69 | -1.11 to -0.26 |
| Japan       | 2000-2011 | 0.26  | 0.07 to 0.45   | 2011-2019 | -0.77 | -1.07 to -0.46 | NA        | NA    | NA              | NA        | NA   | NA            | 2000-2019 | -0.17 | -0.33 to -0.02 |
| Kuwait      | 2000-2004 | -2.24 | -4.27 to -0.18 | 2004-2008 | 7.40  | 4.41 to 10.48  | 2008-2011 | -7.58 | -12.01 to -2.93 | 2011-2019 | 1.85 | 1.39 to 2.31  | 2000-2019 | 0.55  | -0.39 to 1.51  |
| Kyrgyzstan  | 2000-2006 | -0.97 | -1.76 to -0.18 | 2006-2009 | -3.65 | -8.00 to 0.91  | 2009-2017 | -1.42 | -2.05 to -0.79  | 2017-2019 | 3.11 | -1.57 to 8.01 | 2000-2019 | -1.17 | -1.98 to -0.35 |
| Latvia      | 2000-2007 | 3.23  | 2.00 to 4.47   | 2007-2011 | -5.23 | -9.53 to -0.73 | 2011-2019 | -0.04 | -1.17 to 1.09   | NA        | NA   | NA            | 2000-2019 | 0.02  | -1.03 to 1.08  |
| Lithuania   | 2000-2007 | 3.41  | 2.13 to 4.71   | 2007-2010 | -5.08 | -13.56 to 4.24 | 2010-2019 | -0.82 | -1.78 to 0.15   | NA        | NA   | NA            | 2000-2019 | 0.02  | -1.42 to 1.49  |
| Luxembourg  | 2000-2006 | -1.35 | -1.69 to -1.01 | 2006-2016 | -2.34 | -2.52 to -2.16 | 2016-2019 | -0.08 | -1.09 to 0.95   | NA        | NA   | NA            | 2000-2019 | -1.67 | -1.86 to -1.48 |
| Malta       | 2000-2004 | -0.07 | -0.93 to 0.79  | 2004-2007 | 2.86  | 0.13 to 5.66   | 2007-2013 | -0.82 | -1.42 to -0.22  | 2013-2019 | 2.23 | 1.78 to 2.69  | 2000-2019 | 0.87  | 0.42 to 1.33   |
| Mauritius   | 2000-2004 | 4.49  | 2.12 to 6.92   | 2004-2019 | 1.64  | 1.37 to 1.92   | NA        | NA    | NA              | NA        | NA   | NA            | 2000-2019 | 2.24  | 1.74 to 2.74   |
| Mexico      | 2000-2012 | 2.17  | 1.69 to 2.64   | 2012-2019 | 3.84  | 2.99 to 4.68   | NA        | NA    | NA              | NA        | NA   | NA            | 2000-2019 | 2.78  | 2.38 to 3.18   |
| Netherlands | 2000-2019 | 0.33  | 0.16 to 0.50   | NA        | NA    | NA             | NA        | NA    | NA              | NA        | NA   | NA            | 2000-2019 | 0.33  | 0.16 to 0.50   |
| New Zealand | 2000-2019 | 0.77  | 0.60 to 0.94   | NA        | NA    | NA             | NA        | NA    | NA              | NA        | NA   | NA            | 2000-2019 | 0.77  | 0.60 to 0.94   |
| Norway      | 2000-2011 | 0.17  | -0.20 to 0.54  | 2011-2019 | -2.46 | -3.05 to -1.87 | NA        | NA    | NA              | NA        | NA   | NA            | 2000-2019 | -0.95 | -1.25 to -0.64 |
| Pama        | 2000-2009 | 3.47  | 2.79 to 4.15   | 2009-2019 | 1.59  | 1.15 to 2.03   | NA        | NA    | NA              | NA        | NA   | NA            | 2000-2019 | 2.47  | 2.11 to 2.84   |
| Philippines | 2000-2007 | -0.89 | -1.17 to -0.60 | 2007-2010 | 1.71  | -0.32 to 3.78  | 2010-2013 | 3.42  | 1.49 to 5.39    | 2013-2019 | 1.86 | 1.57 to 2.15  | 2000-2019 | 1.06  | 0.66 to 1.46   |
| Poland      | 2000-2002 | -0.72 | -3.57 to 2.22  | 2002-2007 | 2.39  | 1.45 to 3.34   | 2007-2016 | -1.14 | -1.47 to -0.82  | 2016-2019 | 2.00 | 0.48 to 3.54  | 2000-2019 | 0.31  | -0.10 to 0.74  |
| Puerto Rico | 2000-2009 | 2.04  | 1.25 to 2.84   | 2009-2019 | 0.26  | -0.38 to 0.91  | NA        | NA    | NA              | NA        | NA   | NA            | 2000-2019 | 1.10  | 0.64 to 1.57   |
| Republic of | 2000-2010 | 3.15  | 2.77 to 3.53   | 2010-2016 | -3.54 | -4.50 to -2.58 | 2016-2019 | 1.82  | -0.50 to 4.20   | NA        | NA   | NA            | 2000-2019 | 0.78  | 0.31 to 1.25   |

|                          |           |       |                |           |       |                |           |       |                |           |       |                |           |       |                |
|--------------------------|-----------|-------|----------------|-----------|-------|----------------|-----------|-------|----------------|-----------|-------|----------------|-----------|-------|----------------|
| Korea                    |           |       |                |           |       |                |           |       |                |           |       |                |           |       |                |
| Republic of              | 2000-2009 | 3.31  | 2.31 to 4.31   | 2009-2012 | -4.09 | -13.67 to 6.56 | 2012-2015 | 4.37  | -6.49 to       | 2015-2019 | -3.44 | -6.73 to -0.03 | 2000-2019 | 0.82  | -1.38 to 3.08  |
| Moldova                  |           |       |                |           |       |                |           |       | 16.48          |           |       |                |           |       |                |
| Romania                  | 2000-2010 | 1.82  | 1.29 to 2.36   | 2010-2013 | -2.26 | -8.76 to 4.72  | 2013-2019 | 2.88  | 1.77 to 4.00   | NA        | NA    | NA             | 2000-2019 | 1.50  | 0.43 to 2.57   |
| Saint Lucia              | 2000-2005 | -1.16 | -2.13 to -0.18 | 2005-2012 | 3.60  | 2.93 to 4.27   | 2012-2019 | -0.07 | -0.53 to 0.38  | NA        | NA    | NA             | 2000-2019 | 0.97  | 0.62 to 1.33   |
| Serbia                   | 2000-2019 | 0.52  | 0.39 to 0.66   | NA        | NA    | NA             | NA        | NA    | NA             | NA        | NA    | NA             | 2000-2019 | 0.52  | 0.39 to 0.66   |
| Singapore                | 2000-2008 | -0.71 | -1.10 to -0.31 | 2008-2017 | -1.78 | -2.16 to -1.41 | 2017-2019 | 1.34  | -2.17 to 4.97  | NA        | NA    | NA             | 2000-2019 | -1.01 | -1.40 to -0.61 |
| Slovakia                 | 2000-2004 | -1.96 | -3.30 to -0.60 | 2004-2008 | 2.47  | 0.23 to 4.76   | 2008-2019 | 0.48  | 0.19 to 0.77   | NA        | NA    | NA             | 2000-2019 | 0.38  | -0.14 to 0.89  |
| Slovenia                 | 2000-2011 | -0.06 | -0.62 to 0.51  | 2011-2014 | -4.18 | -12.17 to 4.52 | 2014-2019 | 1.04  | -0.98 to 3.09  | NA        | NA    | NA             | 2000-2019 | -0.43 | -1.78 to 0.93  |
| Spain                    | 2000-2017 | -0.79 | -0.97 to -0.61 | 2017-2019 | 3.56  | -1.51 to 8.89  | NA        | NA    | NA             | NA        | NA    | NA             | 2000-2019 | -0.34 | -0.84 to 0.17  |
| Sweden                   | 2000-2019 | 0.28  | 0.11 to 0.46   | NA        | NA    | NA             | NA        | NA    | NA             | NA        | NA    | NA             | 2000-2019 | 0.28  | 0.11 to 0.46   |
| Switzerland              | 2000-2004 | 0.72  | -0.55 to 2.00  | 2004-2012 | -1.39 | -1.90 to -0.88 | 2012-2015 | -3.51 | -7.30 to 0.44  | 2015-2019 | 0.66  | -0.65 to 1.98  | 2000-2019 | -0.86 | -1.52 to -0.19 |
| Trinidad and Tobago      | 2000-2008 | 3.84  | 2.73 to 4.96   | 2008-2012 | -4.10 | -8.36 to 0.36  | 2012-2019 | 0.78  | -0.49 to 2.06  | NA        | NA    | NA             | 2000-2019 | 1.00  | -0.05 to 2.05  |
| United Kingdom           | 2000-2009 | 1.26  | 0.74 to 1.78   | 2009-2012 | -0.67 | -5.79 to 4.72  | 2012-2017 | 2.92  | 1.27 to 4.60   | 2017-2019 | -1.71 | -6.58 to 3.42  | 2000-2019 | 1.07  | 0.10 to 2.04   |
| United States of America | 2000-2002 | 2.39  | -1.59 to 6.53  | 2002-2005 | -0.64 | -4.42 to 3.28  | 2005-2016 | 1.23  | 0.93 to 1.52   | 2016-2019 | -1.87 | -3.69 to -0.00 | 2000-2019 | 0.56  | -0.15 to 1.27  |
| Uruguay                  | 2000-2006 | -0.37 | -1.01 to 0.27  | 2006-2010 | 1.97  | 0.10 to 3.86   | 2010-2016 | -1.02 | -1.82 to -0.20 | 2016-2019 | 1.81  | -0.01 to 3.66  | 2000-2019 | 0.25  | -0.25 to 0.76  |

AAPC: Average annual percent change; CRC: Colorectal cancer; EAPC: Estimated annual percentage change; NA: Not available.

**Supplementary Table 12: Joinpoint analysis for CRC, age-standardized mortality in 2000–2019 for both genders, younger than 50 years.**

| Country             | Trend 1   |       |               | Trend 2   |      |               | Trend 3   |       |                | Trend 4   |      |              | Year      | AAPC | Range         |
|---------------------|-----------|-------|---------------|-----------|------|---------------|-----------|-------|----------------|-----------|------|--------------|-----------|------|---------------|
|                     | Year      | EAPC  | Range         | Year      | EAPC | Range         | Year      | EAPC  | Range          | Year      | EAPC | Range        |           |      |               |
| Antigua and Barbuda | 2000-2002 | -0.90 | -2.66 to 0.90 | 2002-2009 | 0.66 | 0.38 to 0.94  | 2009-2019 | 0.29  | 0.17 to 0.41   | NA        | NA   | NA           | 2000-2019 | 0.30 | 0.10 to 0.50  |
| Argenti             | 2000-2005 | -0.51 | -1.22 to 0.21 | 2005-2008 | 1.54 | -1.55 to 4.73 | 2008-2015 | -0.61 | -1.11 to -0.11 | 2015-2019 | 1.13 | 0.24 to 2.02 | 2000-2019 | 0.12 | -0.39 to 0.63 |



|            |           |       |                |           |       |                |           |       |                |           |       |               |           |       |                |
|------------|-----------|-------|----------------|-----------|-------|----------------|-----------|-------|----------------|-----------|-------|---------------|-----------|-------|----------------|
| Australia  | 2000-2005 | -2.59 | -3.24 to -1.94 | 2005-2012 | 0.09  | -0.42 to 0.60  | 2012-2015 | 2.04  | -0.88 to 5.05  | 2015-2019 | -0.82 | -1.70 to 0.07 | 2000-2019 | -0.51 | -0.99 to -0.03 |
| Austria    | 2000-2007 | -6.78 | -7.24 to -6.31 | 2007-2013 | -3.37 | -4.31 to -2.43 | 2013-2019 | -0.59 | -1.38 to 0.20  | NA        | NA    | NA            | 2000-2019 | -3.78 | -4.16 to -3.40 |
| Barbados   | 2000-2006 | 1.84  | 1.02 to 2.67   | 2006-2019 | -0.66 | -0.90 to -0.42 | NA        | NA    | NA             | NA        | NA    | NA            | 2000-2019 | 0.13  | -0.15 to 0.41  |
| Belgium    | 2000-2007 | -1.41 | -1.86 to -0.97 | 2007-2014 | -3.12 | -3.72 to -2.53 | 2014-2019 | -0.10 | -0.96 to 0.76  | NA        | NA    | NA            | 2000-2019 | -1.71 | -2.02 to -1.39 |
| Brazil     | 2000-2011 | 0.50  | 0.32 to 0.69   | 2011-2019 | -0.76 | -1.02 to -0.49 | NA        | NA    | NA             | NA        | NA    | NA            | 2000-2019 | -0.03 | -0.17 to 0.11  |
| Cada       | 2000-2006 | 0.83  | 0.44 to 1.23   | 2006-2011 | -1.17 | -1.87 to -0.45 | 2011-2017 | 0.56  | 0.04 to 1.08   | 2017-2019 | -1.89 | -4.19 to 0.46 | 2000-2019 | -0.07 | -0.40 to 0.25  |
| Chile      | 2000-2006 | 0.62  | -0.18 to 1.43  | 2006-2015 | 2.75  | 2.29 to 3.22   | 2015-2019 | -1.25 | -2.45 to -0.02 | NA        | NA    | NA            | 2000-2019 | 1.23  | 0.84 to 1.61   |
| Chi        | 2000-2007 | 0.55  | 0.20 to 0.90   | 2007-2010 | 1.85  | -0.60 to 4.35  | 2010-2016 | -1.01 | -1.52 to -0.49 | 2016-2019 | 1.86  | 0.64 to 3.09  | 2000-2019 | 0.46  | 0.05 to 0.88   |
| Colombia   | 2000-2010 | 1.59  | 1.01 to 2.18   | 2010-2019 | -0.02 | -0.63 to 0.59  | NA        | NA    | NA             | NA        | NA    | NA            | 2000-2019 | 0.82  | 0.44 to 1.21   |
| Costa Rica | 2000-2019 | 2.36  | 1.99 to 2.74   | NA        | NA    | NA             | NA        | NA    | NA             | NA        | NA    | NA            | 2000-2019 | 2.36  | 1.99 to 2.74   |
| Croatia    | 2000-2008 | 0.06  | -0.64 to 0.75  | 2008-2019 | -1.68 | -2.15 to -1.21 | NA        | NA    | NA             | NA        | NA    | NA            | 2000-2019 | -0.95 | -1.32 to -0.59 |
| Cuba       | 2000-2009 | -1.57 | -2.16 to -0.98 | 2009-2019 | 1.51  | 1.01 to 2.02   | NA        | NA    | NA             | NA        | NA    | NA            | 2000-2019 | 0.04  | -0.31 to 0.39  |
| Denmark    | 2000-2008 | -1.91 | -2.33 to -1.48 | 2008-2015 | -3.98 | -4.68 to -3.27 | 2015-2019 | 1.29  | -0.20 to 2.80  | NA        | NA    | NA            | 2000-2019 | -2.02 | -2.41 to -1.62 |
| Ecuador    | 2000-2006 | 5.76  | 4.54 to 6.99   | 2006-2019 | -0.32 | -0.61 to -0.03 | NA        | NA    | NA             | NA        | NA    | NA            | 2000-2019 | 1.56  | 1.17 to 1.95   |
| Estonia    | 2000-2019 | -2.20 | -2.55 to -1.85 | NA        | NA    | NA             | NA        | NA    | NA             | NA        | NA    | NA            | 2000-2019 | -2.20 | -2.55 to -1.85 |
| Fiji       | 2000-2002 | -4.59 | -7.56 to -1.52 | 2002-2007 | 3.30  | 2.31 to 4.29   | 2007-2019 | 1.46  | 1.30 to 1.63   | NA        | NA    | NA            | 2000-2019 | 1.29  | 0.90 to 1.68   |
| Finland    | 2000-2009 | -0.21 | -0.74 to 0.34  | 2009-2016 | -2.95 | -4.01 to -1.88 | 2016-2019 | 0.42  | -3.01 to 3.97  | NA        | NA    | NA            | 2000-2019 | -1.13 | -1.77 to -0.48 |
| France     | 2000-2002 | -0.09 | -4.19 to 4.19  | 2002-2006 | -3.30 | -5.36 to -1.19 | 2006-2017 | -1.48 | -1.83 to -1.12 | 2017-2019 | 1.22  | -3.56 to 6.24 | 2000-2019 | -1.44 | -2.15 to -0.72 |
| Germany    | 2000-2003 | 1.79  | 0.32 to 3.28   | 2003-2008 | -2.65 | -3.54 to -1.75 | 2008-2014 | -6.72 | -7.42 to -6.01 | 2014-2019 | 1.29  | 0.41 to 2.17  | 2000-2019 | -2.26 | -2.66 to -1.86 |
| Greece     | 2000-2005 | -0.22 | -0.71 to 0.28  | 2005-2008 | 1.13  | -1.05 to 3.35  | 2008-2015 | -0.86 | -1.23 to -0.49 | 2015-2019 | 1.19  | 0.47 to 1.91  | 2000-2019 | 0.05  | -0.31 to 0.41  |
| Greda      | 2000-2004 | 2.38  | 1.17 to 3.62   | 2004-2019 | 0.22  | 0.08 to 0.37   | NA        | NA    | NA             | NA        | NA    | NA            | 2000-2019 | 0.68  | 0.42 to 0.93   |
| Guatemala  | 2000-2006 | 2.85  | 1.52 to 4.20   | 2006-2019 | 0.08  | -0.24 to 0.41  | NA        | NA    | NA             | NA        | NA    | NA            | 2000-2019 | 0.95  | 0.52 to 1.38   |
| Guya       | 2000-2005 | -0.64 | -1.89 to 0.64  | 2005-2019 | 1.01  | 0.75 to 1.26   | NA        | NA    | NA             | NA        | NA    | NA            | 2000-2019 | 0.57  | 0.22 to 0.93   |
| Hungary    | 2000-2006 | -0.07 | -0.81 to 0.68  | 2006-2016 | -4.24 | -4.69 to -3.80 | 2016-2019 | 2.38  | -0.34 to 5.17  | NA        | NA    | NA            | 2000-2019 | -1.92 | -2.39 to -1.43 |
| Iceland    | 2000-2003 | -3.01 | -3.86 to -2.16 | 2003-2008 | -1.61 | -2.16 to -1.06 | 2008-2017 | -0.92 | -1.12 to -0.72 | 2017-2019 | 0.50  | -1.34 to 2.37 | 2000-2019 | -1.29 | -1.54 to -1.03 |
| Israel     | 2000-2008 | -1.43 | -1.85 to -1.01 | 2008-2012 | -5.15 | -7.05 to -3.22 | 2012-2019 | 0.15  | -0.38 to 0.68  | NA        | NA    | NA            | 2000-2019 | -1.65 | -2.09 to -1.21 |
| Italy      | 2000-2016 | -2.13 | -2.24 to -2.02 | 2016-2019 | 0.45  | -1.08 to 2.00  | NA        | NA    | NA             | NA        | NA    | NA            | 2000-2019 | -1.73 | -1.96 to -1.49 |
| Japan      | 2000-2008 | -1.76 | -1.96 to -1.55 | 2008-2011 | -0.60 | -2.60 to 1.43  | 2011-2017 | -1.82 | -2.27 to -1.37 | 2017-2019 | 0.38  | -1.71 to 2.52 | 2000-2019 | -1.37 | -1.73 to -1.01 |
| Kuwait     | 2000-2004 | -2.10 | -4.34 to 0.20  | 2004-2008 | 4.39  | 1.10 to 7.80   | 2008-2012 | -7.27 | -9.90 to -4.56 | 2012-2019 | 0.25  | -0.42 to 0.94 | 2000-2019 | -1.03 | -1.94 to -0.12 |
| Kyrgyzstan | 2000-2006 | -1.33 | -2.11 to -0.54 | 2006-2009 | -5.11 | -9.44 to -0.57 | 2009-2017 | -2.43 | -3.08 to -1.77 | 2017-2019 | 1.89  | -3.09 to 7.11 | 2000-2019 | -2.07 | -2.90 to -1.23 |

|                     |           |       |                |           |       |                |           |       |                |           |       |                |           |       |                |
|---------------------|-----------|-------|----------------|-----------|-------|----------------|-----------|-------|----------------|-----------|-------|----------------|-----------|-------|----------------|
| Latvia              | 2000-2007 | 1.73  | 0.46 to 3.01   | 2007-2010 | -7.41 | -16.18 to 2.28 | 2010-2019 | -1.81 | -2.85 to -0.76 | NA        | NA    | NA             | 2000-2019 | -1.44 | -2.95 to 0.09  |
| Lithuania           | 2000-2007 | 2.90  | 1.79 to 4.03   | 2007-2010 | -6.61 | -14.08 to 1.50 | 2010-2019 | -1.50 | -2.37 to -0.62 | NA        | NA    | NA             | 2000-2019 | -0.74 | -2.02 to 0.55  |
| Luxembourg          | 2000-2009 | -3.51 | -3.74 to -3.29 | 2009-2016 | -2.72 | -3.17 to -2.28 | 2016-2019 | 0.16  | -1.18 to 1.52  | NA        | NA    | NA             | 2000-2019 | -2.65 | -2.91 to -2.39 |
| g                   |           |       |                |           |       |                |           |       |                |           |       |                |           |       |                |
| Malta               | 2000-2004 | -1.87 | -2.41 to -1.34 | 2004-2007 | 1.24  | -0.52 to 3.02  | 2007-2013 | -1.61 | -2.01 to -1.21 | 2013-2019 | 0.98  | 0.67 to 1.29   | 2000-2019 | -0.41 | -0.70 to -0.12 |
| Mauritius           | 2000-2005 | 4.06  | 2.20 to 5.95   | 2005-2019 | 0.77  | 0.43 to 1.12   | NA        | NA    | NA             | NA        | NA    | NA             | 2000-2019 | 1.63  | 1.13 to 2.13   |
| Mexico              | 2000-2012 | 1.59  | 1.12 to 2.06   | 2012-2019 | 3.07  | 2.21 to 3.93   | NA        | NA    | NA             | NA        | NA    | NA             | 2000-2019 | 2.13  | 1.74 to 2.53   |
| Netherlands         | 2000-2007 | -1.79 | -2.15 to -1.43 | 2007-2011 | 0.03  | -1.35 to 1.42  | 2011-2014 | -2.44 | -5.18 to 0.38  | 2014-2019 | 0.38  | -0.29 to 1.04  | 2000-2019 | -0.95 | -1.44 to -0.45 |
| New Zealand         | 2000-2019 | -0.45 | -0.58 to -0.32 | NA        | NA    | NA             | NA        | NA    | NA             | NA        | NA    | NA             | 2000-2019 | -0.45 | -0.58 to -0.32 |
| Norway              | 2000-2006 | -2.23 | -2.58 to -1.87 | 2006-2011 | -0.78 | -1.47 to -0.08 | 2011-2017 | -3.58 | -4.07 to -3.09 | 2017-2019 | -0.16 | -2.50 to 2.24  | 2000-2019 | -2.06 | -2.38 to -1.75 |
| Pama                | 2000-2009 | 3.66  | 2.89 to 4.43   | 2009-2019 | 0.16  | -0.35 to 0.67  | NA        | NA    | NA             | NA        | NA    | NA             | 2000-2019 | 1.80  | 1.38 to 2.22   |
| Philippines         | 2000-2007 | -1.04 | -1.19 to -0.89 | 2007-2011 | 1.19  | 0.65 to 1.73   | 2011-2015 | 2.65  | 2.14 to 3.16   | 2015-2019 | 1.23  | 0.94 to 1.52   | 2000-2019 | 0.67  | 0.52 to 0.82   |
| Poland              | 2000-2002 | -2.14 | -4.77 to 0.57  | 2002-2007 | 1.20  | 0.31 to 2.10   | 2007-2015 | -2.78 | -3.18 to -2.38 | 2015-2019 | 0.77  | -0.23 to 1.78  | 2000-2019 | -0.93 | -1.33 to -0.54 |
| Puerto Rico         | 2000-2019 | -0.10 | -0.36 to 0.17  | NA        | NA    | NA             | NA        | NA    | NA             | NA        | NA    | NA             | 2000-2019 | -0.10 | -0.36 to 0.17  |
| Republic of Korea   | 2000-2006 | -0.87 | -1.30 to -0.44 | 2006-2010 | 0.70  | -0.55 to 1.96  | 2010-2016 | -5.13 | -5.70 to -4.56 | 2016-2019 | 1.14  | -0.30 to 2.59  | 2000-2019 | -1.60 | -1.96 to -1.24 |
| Republic of Moldova | 2000-2009 | 2.61  | 1.72 to 3.51   | 2009-2012 | -5.30 | -14.09 to 4.40 | 2012-2015 | 2.63  | -7.53 to 13.90 | 2015-2019 | -4.68 | -7.85 to -1.40 | 2000-2019 | -0.24 | -2.29 to 1.86  |
| Romania             | 2000-2010 | 0.47  | -0.05 to 0.99  | 2010-2013 | -3.82 | -10.43 to 3.28 | 2013-2019 | 1.87  | 0.72 to 3.04   | NA        | NA    | NA             | 2000-2019 | 0.22  | -0.87 to 1.32  |
| Saint Lucia         | 2000-2002 | -3.91 | -7.12 to -0.58 | 2002-2006 | -0.48 | -2.09 to 1.16  | 2006-2012 | 3.12  | 2.46 to 3.79   | 2012-2019 | -0.40 | -0.76 to -0.05 | 2000-2019 | 0.30  | -0.18 to 0.78  |
| Serbia              | 2000-2005 | -0.58 | -1.42 to 0.27  | 2005-2013 | -2.05 | -2.60 to -1.49 | 2013-2019 | -0.16 | -0.91 to 0.60  | NA        | NA    | NA             | 2000-2019 | -1.07 | -1.43 to -0.71 |
| Singapore           | 2000-2017 | -3.34 | -3.46 to -3.22 | 2017-2019 | 1.78  | -1.92 to 5.63  | NA        | NA    | NA             | NA        | NA    | NA             | 2000-2019 | -2.81 | -3.17 to -2.45 |
| Slovakia            | 2000-2004 | -2.66 | -4.09 to -1.21 | 2004-2019 | -0.64 | -0.85 to -0.43 | NA        | NA    | NA             | NA        | NA    | NA             | 2000-2019 | -1.07 | -1.39 to -0.75 |
| Slovenia            | 2000-2019 | -2.71 | -3.01 to -2.40 | NA        | NA    | NA             | NA        | NA    | NA             | NA        | NA    | NA             | 2000-2019 | -2.71 | -3.01 to -2.40 |
| Spain               | 2000-2006 | -2.68 | -3.13 to -2.24 | 2006-2012 | -1.66 | -2.24 to -1.07 | 2012-2016 | -3.05 | -4.38 to -1.70 | 2016-2019 | 2.67  | 1.23 to 4.13   | 2000-2019 | -1.61 | -1.98 to -1.24 |
| Sweden              | 2000-2010 | -0.75 | -1.09 to -0.41 | 2010-2019 | 0.08  | -0.32 to 0.48  | NA        | NA    | NA             | NA        | NA    | NA             | 2000-2019 | -0.36 | -0.60 to -0.12 |
| Switzerland         | 2000-2012 | -1.64 | -1.89 to -1.39 | 2012-2015 | -4.03 | -8.24 to 0.37  | 2015-2019 | 0.18  | -1.28 to 1.67  | NA        | NA    | NA             | 2000-2019 | -1.64 | -2.34 to -0.94 |
| Trinidad and Tobago | 2000-2008 | 2.31  | 1.20 to 3.43   | 2008-2012 | -4.61 | -9.07 to 0.07  | 2012-2019 | 0.47  | -0.87 to 1.83  | NA        | NA    | NA             | 2000-2019 | 0.14  | -0.95 to 1.24  |

|                          |           |       |                |           |       |               |           |       |                |           |       |               |           |       |                |
|--------------------------|-----------|-------|----------------|-----------|-------|---------------|-----------|-------|----------------|-----------|-------|---------------|-----------|-------|----------------|
| United Kingdom           | 2000-2013 | -0.84 | -1.07 to -0.60 | 2013-2016 | 2.57  | -1.82 to 7.16 | 2016-2019 | -0.64 | -2.78 to 1.54  | NA        | NA    | NA            | 2000-2019 | -0.28 | -0.98 to 0.43  |
| United States of America | 2000-2002 | 1.37  | -1.70 to 4.55  | 2002-2005 | -0.94 | -3.90 to 2.11 | 2005-2017 | 0.64  | 0.43 to 0.84   | 2017-2019 | -2.43 | -5.36 to 0.58 | 2000-2019 | 0.14  | -0.45 to 0.72  |
| Uruguay                  | 2000-2006 | -1.11 | -1.52 to -0.69 | 2006-2010 | 1.00  | -0.24 to 2.25 | 2010-2016 | -1.54 | -2.09 to -0.99 | 2016-2019 | 1.04  | -0.21 to 2.31 | 2000-2019 | -0.47 | -0.81 to -0.13 |

AAPC: Average annual percent change; CRC: Colorectal cancer;EAPC: Estimated annual percentage change; NA: Not available.

**Supplementary Table 13: Analysis of risk factors associated with CRC incidence in males.**

| Risk factor         | 2015         |              |                 |                    | 2016         |              |                 |                    | 2017         |              |                 |                    | 2018         |                    |                 |               | 2019         |              |                 |                    |
|---------------------|--------------|--------------|-----------------|--------------------|--------------|--------------|-----------------|--------------------|--------------|--------------|-----------------|--------------------|--------------|--------------------|-----------------|---------------|--------------|--------------|-----------------|--------------------|
|                     | $\beta$      | 95% CI       | <i>P</i> -value |                    | $\beta$      | 95% CI       | <i>P</i> -value |                    | $\beta$      | 95% CI       | <i>P</i> -value |                    | $\beta$      | 95% CI             | <i>P</i> -value |               | $\beta$      | 95% CI       | <i>P</i> -value |                    |
| Smoking             | -0.039       | -0.171       | 0.092           | 0.555              | -0.037       | -0.167       | 0.093           | 0.576              | -0.033       | -0.164       | 0.097           | 0.615              | -0.029       | -0.161             | 0.103           | 0.662         | -0.027       | -0.158       | 0.104           | 0.687              |
| Alcohol             | <b>0.436</b> | <b>0.097</b> | <b>0.775</b>    | <b>0.012*</b>      | <b>0.434</b> | <b>0.099</b> | <b>0.769</b>    | <b>0.012*</b>      | <b>0.417</b> | <b>0.081</b> | <b>0.753</b>    | <b>0.015*</b>      | <b>0.423</b> | <b>0.083</b>       | <b>0.762</b>    | <b>0.015*</b> | <b>0.420</b> | <b>0.083</b> | <b>0.758</b>    | <b>0.015*</b>      |
| UHC                 | 0.108        | -0.102       | 0.318           | 0.309              | 0.127        | -0.081       | 0.334           | 0.228              | 0.133        | -0.075       | 0.340           | 0.208              | 0.150        | -0.060             | 0.361           | 0.159         | 0.161        | -0.048       | 0.370           | 0.130              |
| High cholesterol    | <b>0.975</b> | <b>0.508</b> | <b>1.441</b>    | <b>&lt;0.0001*</b> | <b>0.900</b> | <b>0.439</b> | <b>1.361</b>    | <b>&lt;0.0001*</b> | <b>0.859</b> | <b>0.397</b> | <b>1.321</b>    | <b>&lt;0.0001*</b> | <b>0.825</b> | <b>0.357</b>       | <b>1.292</b>    | <b>0.001*</b> | <b>0.814</b> | <b>0.349</b> | <b>1.278</b>    | <b>&lt;0.0001*</b> |
| Physical inactivity | -0.017       | -0.227       | 0.192           | 0.870              | -0.002       | -0.209       | 0.205           | 0.984              | -0.001       | -0.208       | 0.206           | 0.993              | 0.004        | -0.206             | 0.213           | 0.972         | 0.003        | -0.206       | 0.211           | 0.978              |
| GDP                 | 0.105        | -0.345       | 0.554           | 0.645              | 0.116        | -0.328       | 0.561           | 0.605              | 0.146        | -0.300       | 0.591           | 0.518              | 0.149        | -0.301             | 0.600           | 0.513         | 0.152        | -0.295       | 0.600           | 0.501              |
| Out-of-pocket       | -0.031       | -0.136       | 0.074           | 0.561              | -0.032       | -0.137       | 0.072           | 0.537              | -0.036       | -0.141       | 0.068           | 0.491              | -0.036       | -0.141             | 0.070           | 0.504         | -0.033       | -0.138       | 0.072           | 0.539              |
| Unemployment        | <b>0.455</b> | <b>0.080</b> | <b>0.830</b>    | <b>0.018*</b>      | <b>0.413</b> | <b>0.042</b> | <b>0.783</b>    | <b>0.029*</b>      | <b>0.401</b> | <b>0.030</b> | <b>0.772</b>    | <b>0.034*</b>      | <b>0.375</b> | <b>&lt;0.0001*</b> | <b>0.751</b>    | <b>0.050*</b> | <b>0.376</b> | <b>0.002</b> | <b>0.749</b>    | <b>0.049*</b>      |
| Health expenditure  | 0.059        | -0.732       | 0.851           | 0.882              | 0.063        | -0.719       | 0.845           | 0.874              | 0.105        | -0.678       | 0.888           | 0.790              | 0.119        | -0.674             | 0.911           | 0.767         | 0.122        | -0.666       | 0.911           | 0.758              |
| Health system       | <b>1.960</b> | <b>0.120</b> | <b>3.800</b>    | <b>0.037*</b>      | <b>1.946</b> | <b>0.128</b> | <b>3.764</b>    | <b>0.036*</b>      | <b>2.013</b> | <b>0.192</b> | <b>3.834</b>    | <b>0.031*</b>      | <b>1.959</b> | <b>0.116</b>       | <b>3.802</b>    | <b>0.037*</b> | <b>1.896</b> | <b>0.064</b> | <b>3.729</b>    | <b>0.043*</b>      |
| Education           | -0.128       | -0.279       | 0.022           | 0.094              | -0.127       | -0.276       | 0.022           | 0.093              | -0.130       | -0.279       | 0.019           | 0.087              | -0.134       | -0.285             | 0.017           | 0.082         | -0.135       | -0.286       | 0.015           | 0.077              |

The  $\beta$  can be interpreted as the change in ASR of incidence or mortality associated with a 1% increase of a certain risk factor. \**P* values <0.05.  $\beta$ : Beta coefficient; ASR: Age-standardized rates; CI: Confidence interval; CRC: Colorectal cancer; GDP: Gross domestic product.

**Supplementary Table 14: Analysis of risk factors associated with CRC mortality in males.**

| Risk factor         | 2015          |                      |                 | 2016          |                      |                 | 2017         |                    |                 | 2018         |                    |                 | 2019         |                    |                 |
|---------------------|---------------|----------------------|-----------------|---------------|----------------------|-----------------|--------------|--------------------|-----------------|--------------|--------------------|-----------------|--------------|--------------------|-----------------|
|                     | $\beta$       | 95% CI               | <i>P</i> -value | $\beta$       | 95% CI               | <i>P</i> -value | $\beta$      | 95% CI             | <i>P</i> -value | $\beta$      | 95% CI             | <i>P</i> -value | $\beta$      | 95% CI             | <i>P</i> -value |
| Smoking             | 0.018         | -0.074 0.110         | 0.695           | 0.020         | -0.071 0.110         | 0.669           | 0.021        | -0.070 0.112       | 0.651           | 0.022        | -0.069 0.114       | 0.630           | 0.022        | -0.069 0.113       | 0.627           |
| Alcohol             | <b>0.410</b>  | <b>0.173 0.647</b>   | <b>0.001*</b>   | <b>0.406</b>  | <b>0.173 0.640</b>   | <b>0.001*</b>   | <b>0.389</b> | <b>0.155 0.624</b> | <b>0.001*</b>   | <b>0.393</b> | <b>0.157 0.629</b> | <b>0.001*</b>   | <b>0.390</b> | <b>0.156 0.624</b> | <b>0.001*</b>   |
| UHC                 | 0.011         | -0.136 0.157         | 0.887           | 0.022         | -0.123 0.166         | 0.767           | 0.025        | -0.120 0.170       | 0.733           | 0.032        | -0.115 0.178       | 0.668           | 0.038        | -0.107 0.183       | 0.605           |
| High cholesterol    | 0.236         | -0.090 0.562         | 0.154           | 0.190         | -0.131 0.512         | 0.242           | 0.169        | -0.154 0.491       | 0.301           | 0.156        | -0.169 0.481       | 0.342           | 0.154        | -0.167 0.476       | 0.343           |
| Physical inactivity | 0.016         | -0.130 0.162         | 0.832           | 0.023         | -0.121 0.167         | 0.754           | 0.022        | -0.123 0.166       | 0.765           | 0.022        | -0.123 0.168       | 0.760           | 0.020        | -0.124 0.164       | 0.784           |
| GDP                 | -0.091        | -0.405 0.223         | 0.566           | -0.083        | -0.392 0.227         | 0.597           | -0.067       | -0.378 0.243       | 0.668           | -0.062       | -0.375 0.251       | 0.693           | -0.059       | -0.369 0.251       | 0.708           |
| Out-of-pocket       | -0.039        | -0.112 0.035         | 0.299           | -0.039        | -0.112 0.033         | 0.286           | -0.041       | -0.114 0.032       | 0.266           | -0.039       | -0.113 0.034       | 0.290           | -0.036       | -0.109 0.036       | 0.324           |
| Unemployment        | <b>0.307</b>  | <b>0.046 0.569</b>   | <b>0.022*</b>   | <b>0.282</b>  | <b>0.024 0.540</b>   | <b>0.032*</b>   | <b>0.275</b> | <b>0.016 0.534</b> | <b>0.037*</b>   | <b>0.261</b> | <b>0.000 0.522</b> | <b>0.050*</b>   | <b>0.262</b> | <b>0.003 0.520</b> | <b>0.047*</b>   |
| Health expenditure  | <b>-0.581</b> | <b>-1.133 -0.029</b> | <b>0.039*</b>   | <b>-0.575</b> | <b>-1.120 -0.030</b> | <b>0.039*</b>   | -0.540       | -1.087 0.007       | 0.053           | -0.521       | -1.071 0.030       | 0.064           | -0.506       | -1.052 0.039       | 0.069           |
| Health system       | 1.186         | -0.099 2.470         | 0.070           | 1.161         | -0.105 2.428         | 0.072           | 1.173        | -0.098 2.444       | 0.070           | 1.130        | -0.151 2.410       | 0.083           | 1.069        | -0.200 2.338       | 0.098           |
| Education           | -0.051        | -0.156 0.054         | 0.337           | -0.050        | -0.154 0.054         | 0.342           | -0.052       | -0.156 0.052       | 0.326           | -0.053       | -0.158 0.052       | 0.315           | -0.054       | -0.158 0.050       | 0.307           |

The  $\beta$  can be interpreted as the change in ASR of incidence or mortality associated with a 1% increase of a certain risk factor. \**P* values <0.05.  $\beta$ : Beta coefficient; ASR: Age-standardized rates; CI: confidence interval; CRC: Colorectal cancer; GDP: Gross domestic product.

**Supplementary Table 15: Analysis of risk factors associated with CRC incidence in females.**

| Risk factor         | 2015          |                      |                 |  | 2016          |                      |                 |  | 2017          |                      |                 |  | 2018         |                    |                 |  | 2019          |                      |                 |  |
|---------------------|---------------|----------------------|-----------------|--|---------------|----------------------|-----------------|--|---------------|----------------------|-----------------|--|--------------|--------------------|-----------------|--|---------------|----------------------|-----------------|--|
|                     | $\beta$       | 95% CI               | <i>P</i> -value |  | $\beta$       | 95% CI               | <i>P</i> -value |  | $\beta$       | 95% CI               | <i>P</i> -value |  | $\beta$      | 95% CI             | <i>P</i> -value |  | $\beta$       | 95% CI               | <i>P</i> -value |  |
| Smoking             | 0.132         | -0.005 0.268         | 0.058           |  | 0.120         | -0.014 0.255         | 0.080           |  | 0.117         | -0.016 0.251         | 0.084           |  | 0.117        | -0.018 0.252       | 0.090           |  | 0.115         | -0.019 0.250         | 0.092           |  |
| Alcohol             | 0.320         | -0.381 1.021         | 0.367           |  | 0.298         | -0.393 0.990         | 0.394           |  | 0.293         | -0.393 0.980         | 0.398           |  | 0.304        | -0.390 0.998       | 0.387           |  | 0.327         | -0.365 1.018         | 0.351           |  |
| UHC                 | <b>0.160</b>  | <b>0.021 0.298</b>   | <b>0.025*</b>   |  | <b>0.171</b>  | <b>0.035 0.308</b>   | <b>0.015*</b>   |  | <b>0.172</b>  | <b>0.036 0.308</b>   | <b>0.014*</b>   |  | <b>0.177</b> | <b>0.039 0.314</b> | <b>0.012*</b>   |  | <b>0.178</b>  | <b>0.041 0.315</b>   | <b>0.011*</b>   |  |
| High cholesterol    | <b>0.521</b>  | <b>0.172 0.870</b>   | <b>0.004*</b>   |  | <b>0.487</b>  | <b>0.143 0.831</b>   | <b>0.006*</b>   |  | <b>0.468</b>  | <b>0.127 0.810</b>   | <b>0.008*</b>   |  | <b>0.457</b> | <b>0.112 0.803</b> | <b>0.010</b>    |  | <b>0.461</b>  | <b>0.117 0.806</b>   | <b>0.009*</b>   |  |
| Physical inactivity | -0.009        | -0.099 0.080         | 0.837           |  | -0.010        | -0.098 0.079         | 0.830           |  | -0.009        | -0.097 0.079         | 0.839           |  | -0.011       | -0.099 0.078       | 0.814           |  | -0.012        | -0.101 0.076         | 0.786           |  |
| GDP                 | 0.047         | -0.219 0.313         | 0.725           |  | 0.058         | -0.204 0.321         | 0.661           |  | 0.078         | -0.182 0.339         | 0.552           |  | 0.084        | -0.180 0.348       | 0.528           |  | 0.080         | -0.183 0.342         | 0.549           |  |
| Out-of-pocket       | -0.038        | -0.097 0.021         | 0.205           |  | -0.036        | -0.094 0.022         | 0.225           |  | -0.036        | -0.094 0.022         | 0.223           |  | -0.035       | -0.094 0.024       | 0.238           |  | -0.033        | -0.091 0.026         | 0.270           |  |
| Unemployment        | -0.072        | -0.235 0.091         | 0.381           |  | -0.087        | -0.248 0.073         | 0.282           |  | -0.093        | -0.253 0.066         | 0.248           |  | -0.100       | -0.262 0.061       | 0.219           |  | -0.097        | -0.258 0.064         | 0.233           |  |
| Health expenditure  | 0.308         | -0.151 0.768         | 0.186           |  | 0.339         | -0.114 0.793         | 0.141           |  | 0.355         | -0.095 0.805         | 0.121           |  | 0.359        | -0.096 0.815       | 0.120           |  | 0.337         | -0.116 0.791         | 0.143           |  |
| Health system       | 0.861         | -0.211 1.933         | 0.114           |  | 0.892         | -0.166 1.949         | 0.097           |  | 0.949         | -0.101 1.999         | 0.076           |  | 0.978        | -0.084 2.040       | 0.071           |  | 0.954         | -0.104 2.012         | 0.077           |  |
| Education           | <b>-0.096</b> | <b>-0.176 -0.015</b> | <b>0.021*</b>   |  | <b>-0.094</b> | <b>-0.173 -0.014</b> | <b>0.021*</b>   |  | <b>-0.094</b> | <b>-0.173 -0.015</b> | <b>0.020*</b>   |  | 0.117        | -0.018 0.252       | 0.090           |  | <b>-0.095</b> | <b>-0.174 -0.015</b> | <b>0.020*</b>   |  |

The  $\beta$  can be interpreted as the change in ASR of incidence or mortality associated with a 1% increase of a certain risk factor. \**P* values <0.05.  $\beta$ : Beta coefficient; ASR: Age-standardized rates; CI: Confidence interval; CRC: Colorectal cancer; GDP: Gross domestic product.

**Supplementary Table 16: Analysis of risk factors associated with CRC mortality in females.**

| Risk factor         | 2015    |              |                 | 2016    |              |                 | 2017    |              |                 | 2018    |              |                 | 2019    |              |                 |
|---------------------|---------|--------------|-----------------|---------|--------------|-----------------|---------|--------------|-----------------|---------|--------------|-----------------|---------|--------------|-----------------|
|                     | $\beta$ | 95% CI       | <i>P</i> -value |
| Smoking             | 0.047   | -0.049 0.143 | 0.337           | 0.040   | -0.054 0.134 | 0.401           | 0.041   | -0.053 0.135 | 0.391           | 0.042   | -0.052 0.136 | 0.374           | 0.042   | -0.052 0.136 | 0.374           |
| Alcohol             | 0.067   | -0.426 0.560 | 0.788           | 0.061   | -0.423 0.545 | 0.802           | 0.055   | -0.428 0.538 | 0.820           | 0.067   | -0.416 0.549 | 0.785           | 0.067   | -0.416 0.549 | 0.785           |
| UHC                 | 0.052   | -0.046 0.149 | 0.295           | 0.058   | -0.038 0.154 | 0.233           | 0.057   | -0.038 0.153 | 0.236           | 0.057   | -0.038 0.153 | 0.237           | 0.057   | -0.038 0.153 | 0.237           |
| High cholesterol    | 0.154   | -0.092 0.399 | 0.217           | 0.135   | -0.106 0.375 | 0.270           | 0.122   | -0.118 0.363 | 0.314           | 0.119   | -0.122 0.359 | 0.329           | 0.119   | -0.122 0.359 | 0.329           |
| Physical inactivity | 0.012   | -0.051 0.075 | 0.708           | 0.012   | -0.050 0.074 | 0.698           | 0.012   | -0.050 0.074 | 0.694           | 0.011   | -0.051 0.073 | 0.725           | 0.011   | -0.051 0.073 | 0.725           |
| GDP                 | -0.085  | -0.272 0.102 | 0.369           | -0.078  | -0.262 0.106 | 0.403           | -0.066  | -0.250 0.117 | 0.475           | 0.042   | -0.052 0.136 | 0.374           | 0.042   | -0.052 0.136 | 0.374           |
| Out-of-pocket       | -0.028  | -0.070 0.014 | 0.186           | -0.026  | -0.067 0.015 | 0.205           | -0.026  | -0.067 0.015 | 0.207           | 0.067   | -0.416 0.549 | 0.785           | 0.067   | -0.416 0.549 | 0.785           |
| Unemployment        | -0.004  | -0.118 0.111 | 0.949           | -0.011  | -0.123 0.101 | 0.846           | -0.016  | -0.128 0.096 | 0.783           | 0.057   | -0.038 0.153 | 0.237           | 0.057   | -0.038 0.153 | 0.237           |
| Health expenditure  | -0.225  | -0.549 0.098 | 0.170           | -0.208  | -0.525 0.110 | 0.197           | -0.193  | -0.510 0.124 | 0.229           | 0.119   | -0.122 0.359 | 0.329           | 0.119   | -0.122 0.359 | 0.329           |
| Health system       | 0.543   | -0.211 1.297 | 0.156           | 0.529   | -0.212 1.269 | 0.160           | 0.546   | -0.192 1.285 | 0.145           | 0.011   | -0.051 0.073 | 0.725           | 0.011   | -0.051 0.073 | 0.725           |
| Education           | -0.031  | -0.088 0.026 | 0.282           | -0.029  | -0.085 0.026 | 0.297           | -0.030  | -0.085 0.026 | 0.288           | 0.042   | -0.052 0.136 | 0.374           | 0.042   | -0.052 0.136 | 0.374           |

The  $\beta$  can be interpreted as the change in ASR of incidence or mortality associated with a 1% increase of a certain risk factor. \**P* values <0.05.  $\beta$ : Beta coefficient; ASR: Age-standardized rates; CI: Confidence interval; CRC: Colorectal cancer; GDP: Gross domestic product.

**Supplementary Table 17: Analysis of risk factors associated with CRC incidence in both genders.**

| Risk factor         | 2015          |                      |                   | 2016          |                      |                   | 2017          |                      |                 | 2018          |                      |                 | 2019          |                      |                 |
|---------------------|---------------|----------------------|-------------------|---------------|----------------------|-------------------|---------------|----------------------|-----------------|---------------|----------------------|-----------------|---------------|----------------------|-----------------|
|                     | $\beta$       | 95% CI               | <i>P</i> -value   | $\beta$       | 95% CI               | <i>P</i> -value   | $\beta$       | 95% CI               | <i>P</i> -value | $\beta$       | 95% CI               | <i>P</i> -value | $\beta$       | 95% CI               | <i>P</i> -value |
| Smoking             | 0.037         | -0.108 0.183         | 0.613             | 0.034         | -0.109 0.177         | 0.639             | 0.039         | -0.104 0.182         | 0.590           | 0.042         | -0.103 0.187         | 0.567           | 0.044         | -0.101 0.189         | 0.551           |
| Alcohol             | <b>0.412</b>  | <b>0.017 0.807</b>   | <b>0.041*</b>     | <b>0.403</b>  | <b>0.016 0.791</b>   | <b>0.042*</b>     | <b>0.393</b>  | <b>0.006 0.780</b>   | <b>0.046*</b>   | <b>0.401</b>  | <b>0.009 0.793</b>   | <b>0.045*</b>   | <b>0.405</b>  | <b>0.012 0.797</b>   | <b>0.043*</b>   |
| UHC                 | 0.121         | -0.044 0.285         | 0.148             | 0.137         | -0.024 0.299         | 0.094             | 0.142         | -0.019 0.303         | 0.083           | 0.154         | -0.010 0.317         | 0.065           | 0.160         | -0.003 0.323         | 0.055           |
| High cholesterol    | <b>0.785</b>  | <b>0.383 1.186</b>   | <b>&lt;0.0001</b> | <b>0.729</b>  | <b>0.335 1.124</b>   | <b>&lt;0.0001</b> | <b>0.694</b>  | <b>0.300 1.087</b>   | <b>0.001*</b>   | <b>0.669</b>  | <b>0.270 1.068</b>   | <b>0.001*</b>   | <b>0.664</b>  | <b>0.265 1.063</b>   | <b>0.001*</b>   |
| Physical inactivity | -0.005        | -0.140 0.130         | 0.941             | 0.000         | -0.132 0.133         | 0.999             | 0.002         | -0.130 0.134         | 0.976           | 0.003         | -0.131 0.137         | 0.968           | 0.002         | -0.132 0.136         | 0.972           |
| GDP                 | 0.138         | -0.190 0.465         | 0.406             | 0.145         | -0.177 0.466         | 0.375             | 0.167         | -0.154 0.488         | 0.304           | 0.170         | -0.155 0.496         | 0.302           | 0.168         | -0.158 0.493         | 0.309           |
| Out-of-pocket       | -0.035        | -0.112 0.042         | 0.367             | -0.034        | -0.109 0.041         | 0.369             | -0.036        | -0.111 0.039         | 0.339           | -0.036        | -0.112 0.040         | 0.354           | -0.033        | -0.109 0.043         | 0.389           |
| Unemployment        | 0.148         | -0.103 0.399         | 0.244             | 0.121         | -0.125 0.367         | 0.332             | 0.110         | -0.136 0.356         | 0.376           | 0.094         | -0.155 0.344         | 0.455           | 0.095         | -0.154 0.345         | 0.450           |
| Health expenditure  | 0.377         | -0.187 0.942         | 0.188             | 0.386         | -0.169 0.941         | 0.170             | 0.409         | -0.144 0.963         | 0.145           | 0.414         | -0.147 0.976         | 0.146           | 0.399         | -0.162 0.960         | 0.162           |
| Health system       | 1.282         | -0.087 2.650         | 0.066             | 1.287         | -0.057 2.631         | 0.060             | <b>1.342</b>  | <b>0.001 2.683</b>   | <b>0.050*</b>   | 1.331         | -0.029 2.692         | 0.055           | 1.292         | -0.067 2.652         | 0.062           |
| Education           | <b>-0.116</b> | <b>-0.226 -0.007</b> | <b>0.038*</b>     | <b>-0.115</b> | <b>-0.223 -0.008</b> | <b>0.036*</b>     | <b>-0.117</b> | <b>-0.225 -0.010</b> | <b>0.032*</b>   | <b>-0.120</b> | <b>-0.229 -0.011</b> | <b>0.031*</b>   | <b>-0.121</b> | <b>-0.230 -0.012</b> | <b>0.030*</b>   |

The  $\beta$  can be interpreted as the change in ASR of incidence or mortality associated with a 1% increase of a certain risk factor. \**P* values <0.05.  $\beta$ : Beta coefficient;

ASR: Age-standardized rates; CI: Confidence interval; CRC: Colorectal cancer; GDP: Gross domestic product.



**Supplementary Table 18: Analysis of risk factors associated with CRC mortality in both genders.**

| Risk factor         | 2015         |                    |                 | 2016         |                    |                 | 2017         |                    |                 | 2018         |                    |                 | 2019         |                    |                 |
|---------------------|--------------|--------------------|-----------------|--------------|--------------------|-----------------|--------------|--------------------|-----------------|--------------|--------------------|-----------------|--------------|--------------------|-----------------|
|                     | $\beta$      | 95% CI             | <i>P</i> -value |
| Smoking             | 0.055        | -0.042 0.153       | 0.262           | 0.054        | -0.042 0.150       | 0.270           | 0.057        | -0.040 0.153       | 0.246           | 0.058        | -0.039 0.155       | 0.237           | 0.058        | -0.039 0.155       | 0.238           |
| Alcohol             | <b>0.315</b> | <b>0.051 0.579</b> | <b>0.020*</b>   | <b>0.310</b> | <b>0.050 0.569</b> | <b>0.020*</b>   | <b>0.299</b> | <b>0.039 0.560</b> | <b>0.025*</b>   | <b>0.306</b> | <b>0.043 0.569</b> | <b>0.023*</b>   | <b>0.309</b> | <b>0.046 0.571</b> | <b>0.022*</b>   |
| UHC                 | 0.044        | -0.066 0.154       | 0.433           | 0.053        | -0.055 0.161       | 0.334           | 0.055        | -0.054 0.163       | 0.321           | 0.058        | -0.052 0.167       | 0.300           | 0.060        | -0.049 0.169       | 0.280           |
| High cholesterol    | 0.160        | -0.109 0.429       | 0.239           | 0.128        | -0.136 0.392       | 0.339           | 0.109        | -0.156 0.374       | 0.416           | 0.101        | -0.167 0.368       | 0.456           | 0.103        | -0.164 0.370       | 0.446           |
| Physical inactivity | 0.016        | -0.074 0.106       | 0.726           | 0.019        | -0.070 0.107       | 0.679           | 0.019        | -0.070 0.108       | 0.672           | 0.019        | -0.071 0.109       | 0.680           | 0.018        | -0.072 0.107       | 0.696           |
| GDP                 | -0.064       | -0.283 0.156       | 0.565           | -0.059       | -0.274 0.157       | 0.591           | -0.046       | -0.262 0.170       | 0.674           | -0.042       | -0.260 0.177       | 0.707           | -0.041       | -0.259 0.177       | 0.709           |
| Out-of-pocket       | -0.033       | -0.084 0.018       | 0.206           | -0.032       | -0.082 0.018       | 0.211           | -0.033       | -0.084 0.018       | 0.199           | -0.032       | -0.083 0.019       | 0.220           | -0.030       | -0.081 0.021       | 0.251           |
| Unemployment        | 0.120        | -0.048 0.288       | 0.160           | 0.106        | -0.059 0.271       | 0.207           | 0.099        | -0.067 0.264       | 0.240           | 0.090        | -0.077 0.257       | 0.286           | 0.091        | -0.076 0.258       | 0.280           |
| Health expenditure  | -0.301       | -0.680 0.077       | 0.117           | -0.295       | -0.667 0.076       | 0.118           | -0.274       | -0.647 0.100       | 0.149           | -0.261       | -0.637 0.116       | 0.173           | -0.260       | -0.636 0.115       | 0.172           |
| Health system       | 0.682        | -0.234 1.598       | 0.143           | 0.662        | -0.238 1.563       | 0.148           | 0.676        | -0.228 1.580       | 0.141           | 0.662        | -0.250 1.573       | 0.153           | 0.623        | -0.287 1.534       | 0.177           |
| Education           | -0.048       | -0.122 0.025       | 0.193           | -0.047       | -0.119 0.025       | 0.196           | -0.049       | -0.121 0.023       | 0.183           | -0.050       | -0.123 0.023       | 0.177           | -0.050       | -0.123 0.023       | 0.179           |

The  $\beta$  can be interpreted as the change in ASR of incidence or mortality associated with a 1% increase of a certain risk factor. \**P* values <0.05.  $\beta$ : Beta coefficient;

ASR: Age-standardized rates; CI: Confidence interval; CRC: Colorectal cancer; GDP: Gross domestic product.
