# Supplementary material for: Colorectal cancer incidence and mortality: the current status, temporal trends and their attributable risk factors in 60 countries in 2000–2019
Source: PubMed Central journal article supplement — Chin Med J (Engl). 2021 Jul 7;134(16):1941–51. doi: 10.1097/CM9.0000000000001619 (PMC8382382; doi:10.1097/cm9.0000000000001619), 2021-07-07
Supplement: cm9-134-1941-s003.pdf [file cm9-134-1941-s003.pdf]

A

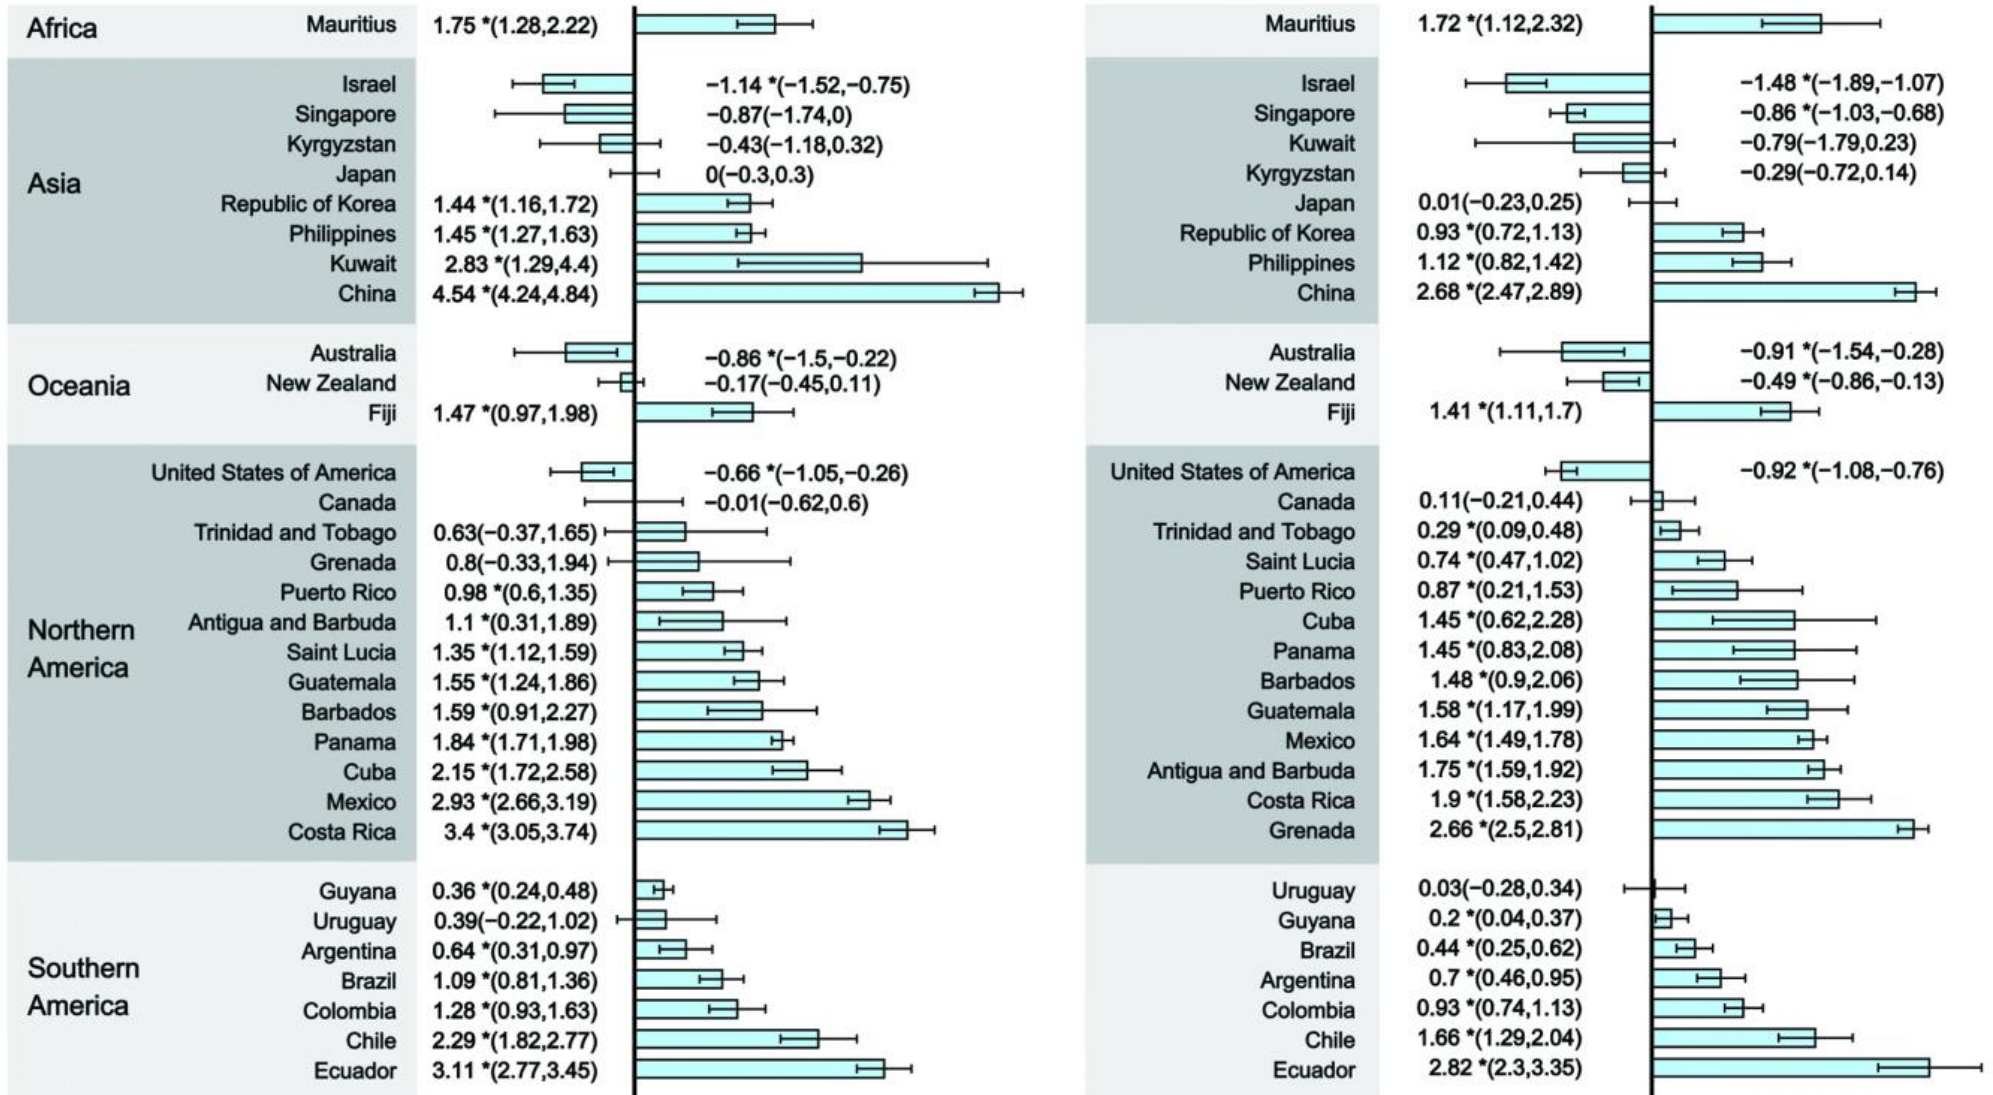

B

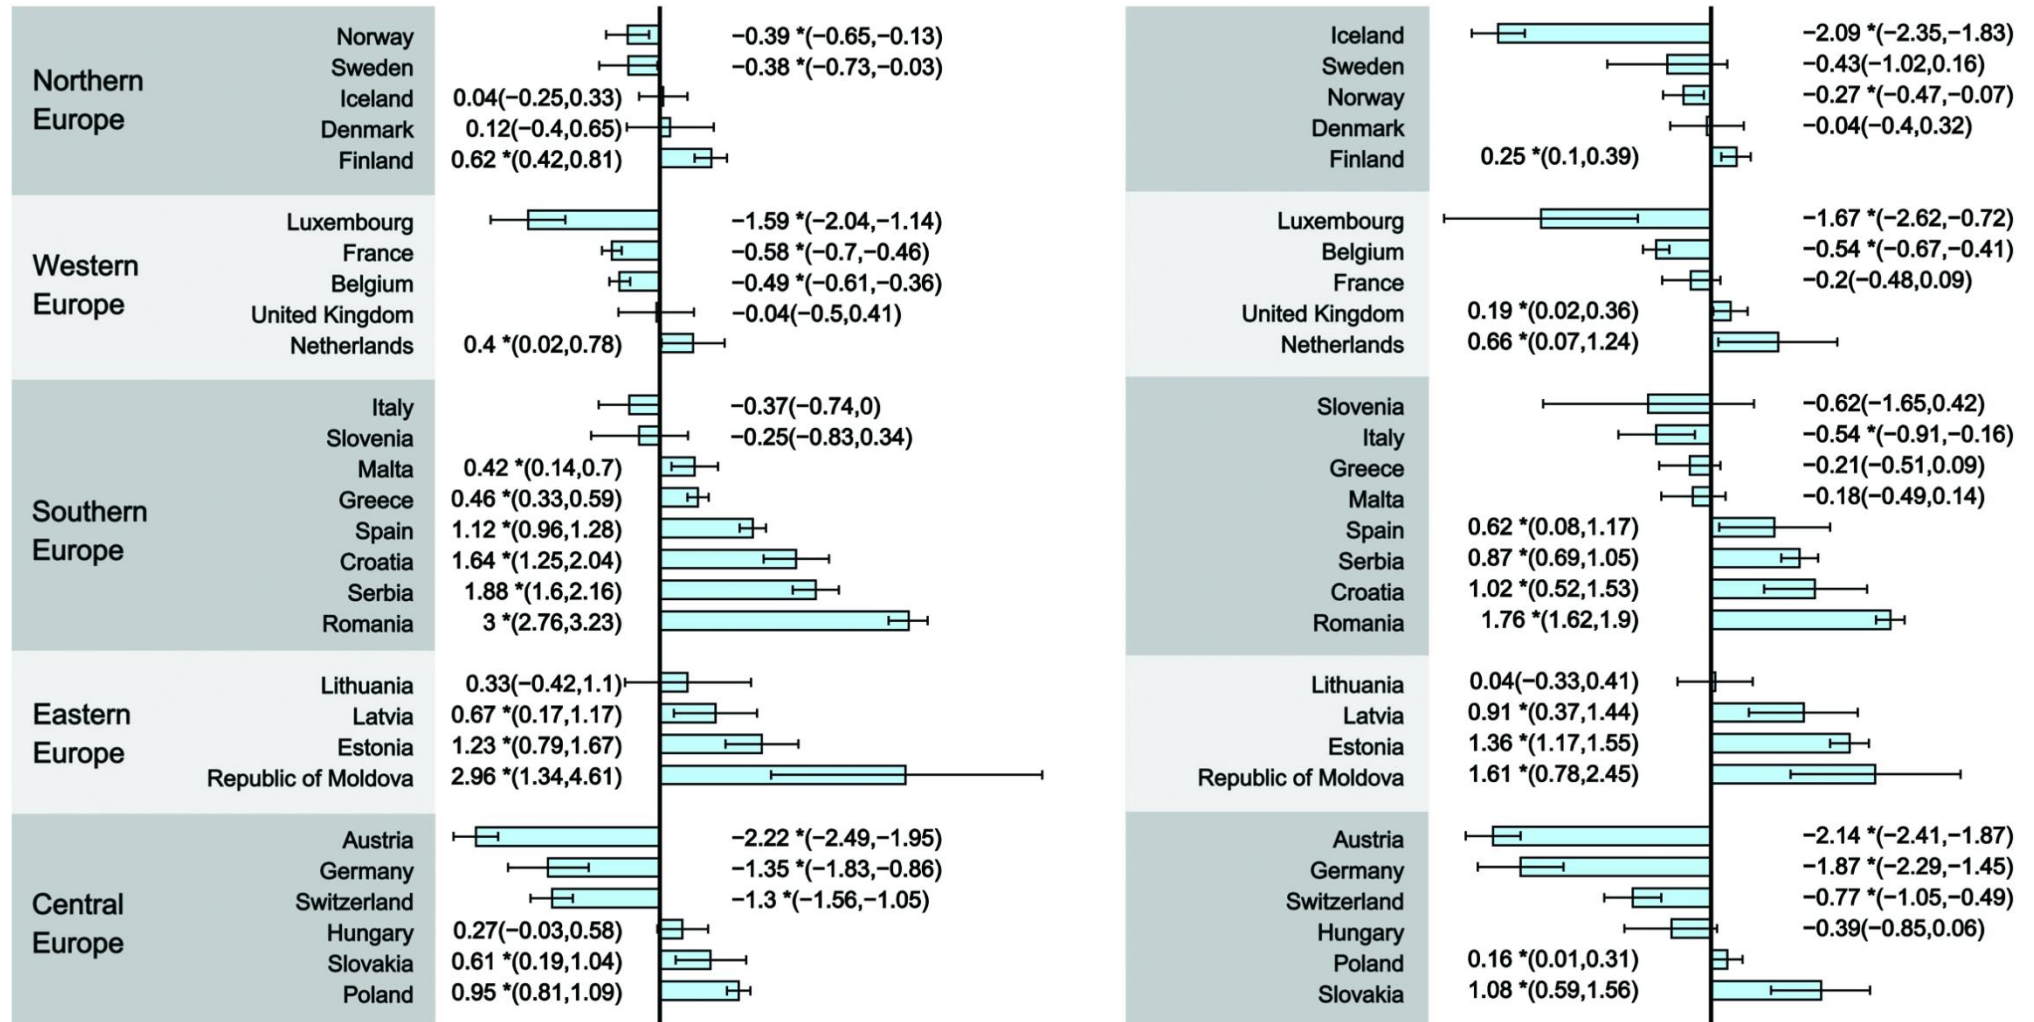

**Supplementary Figure 1: The AAPC of the incidence of CRC in males (left panel) and females (right panel), all ages.**(A) AAPC of countries in Africa, Asia, Oceania, Northern America and Southern America; (B) AAPC of countries in Northern Europe, Western Europe, Southern Europe, Eastern Europe and Central Europe. \* $P < 0.050$ . AAPC: Average annual percent change; CRC: Colorectal cancer.

A

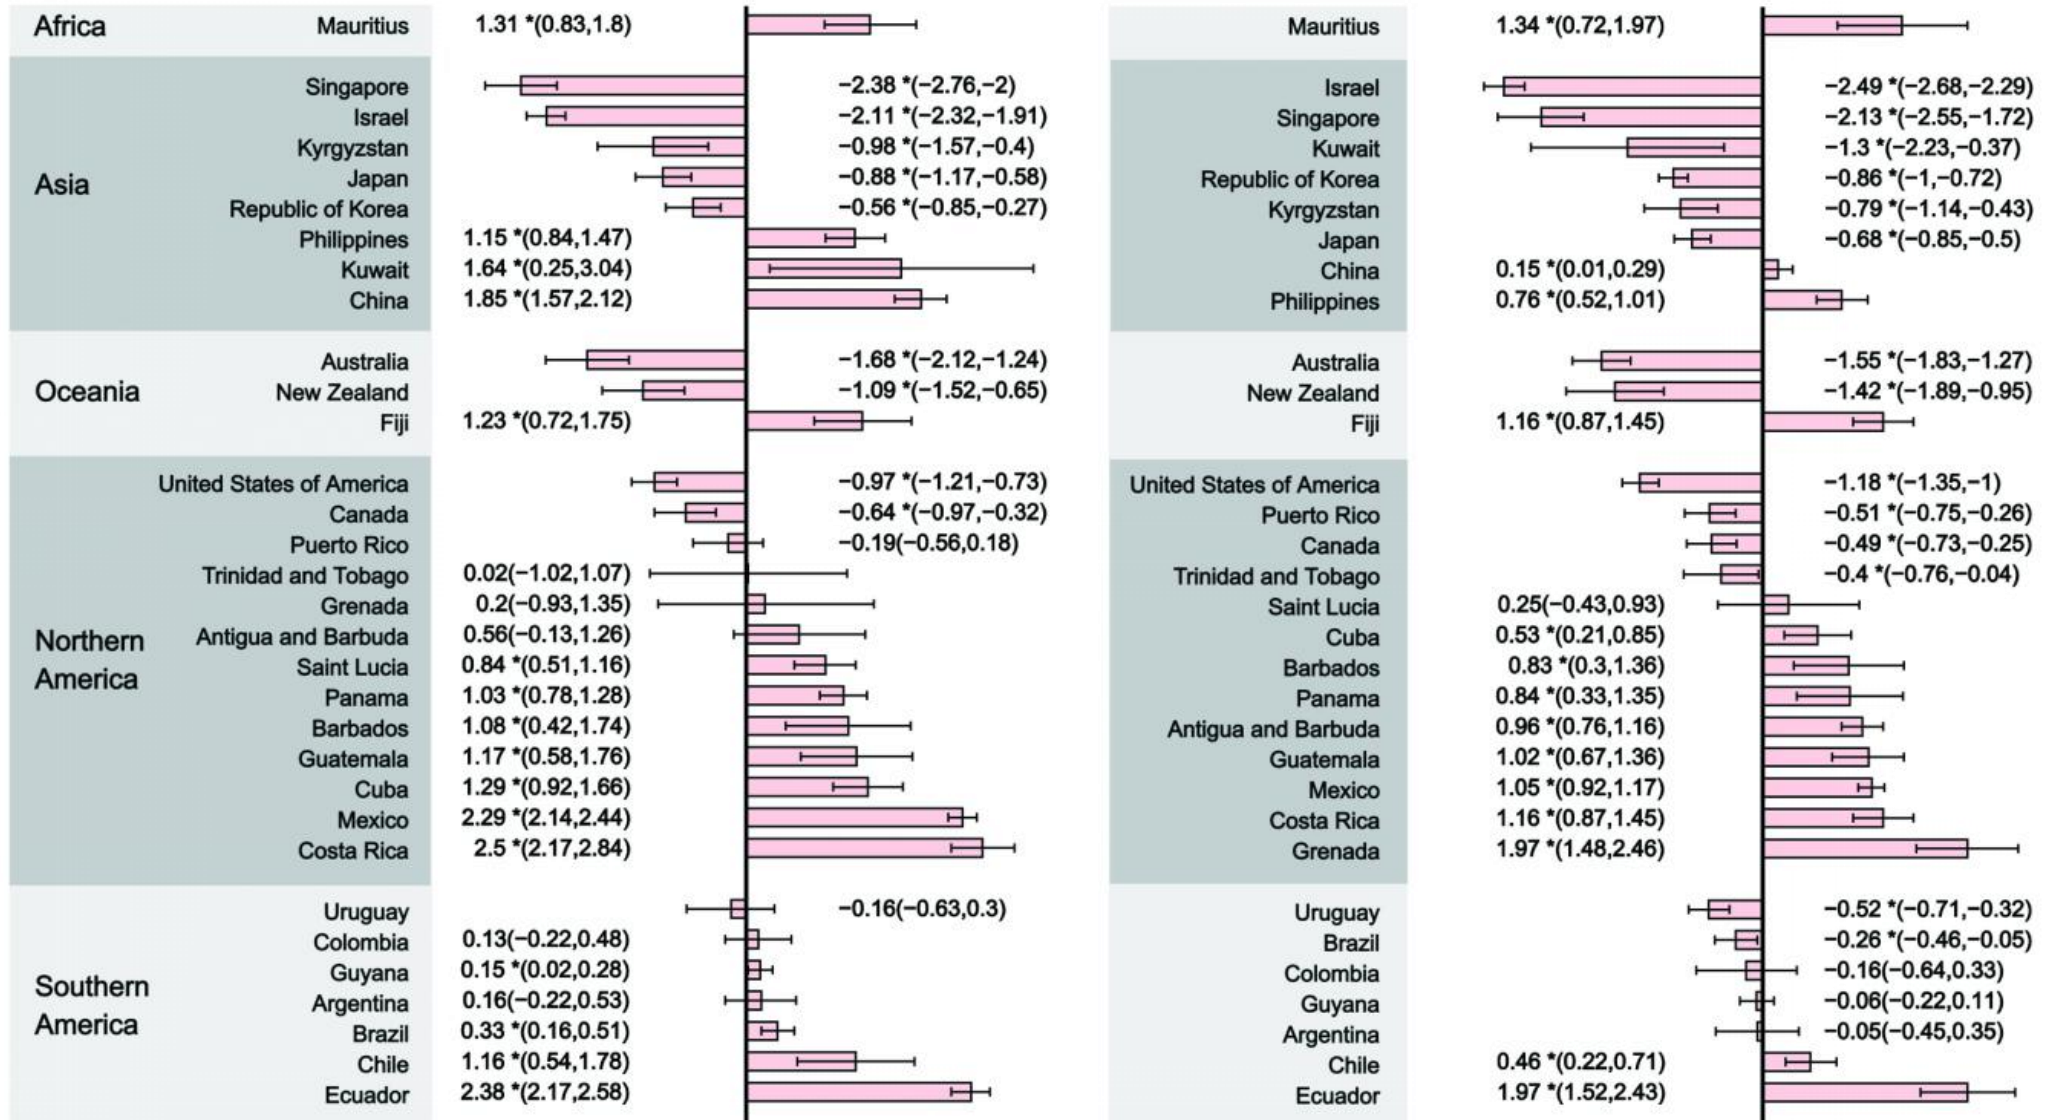

B

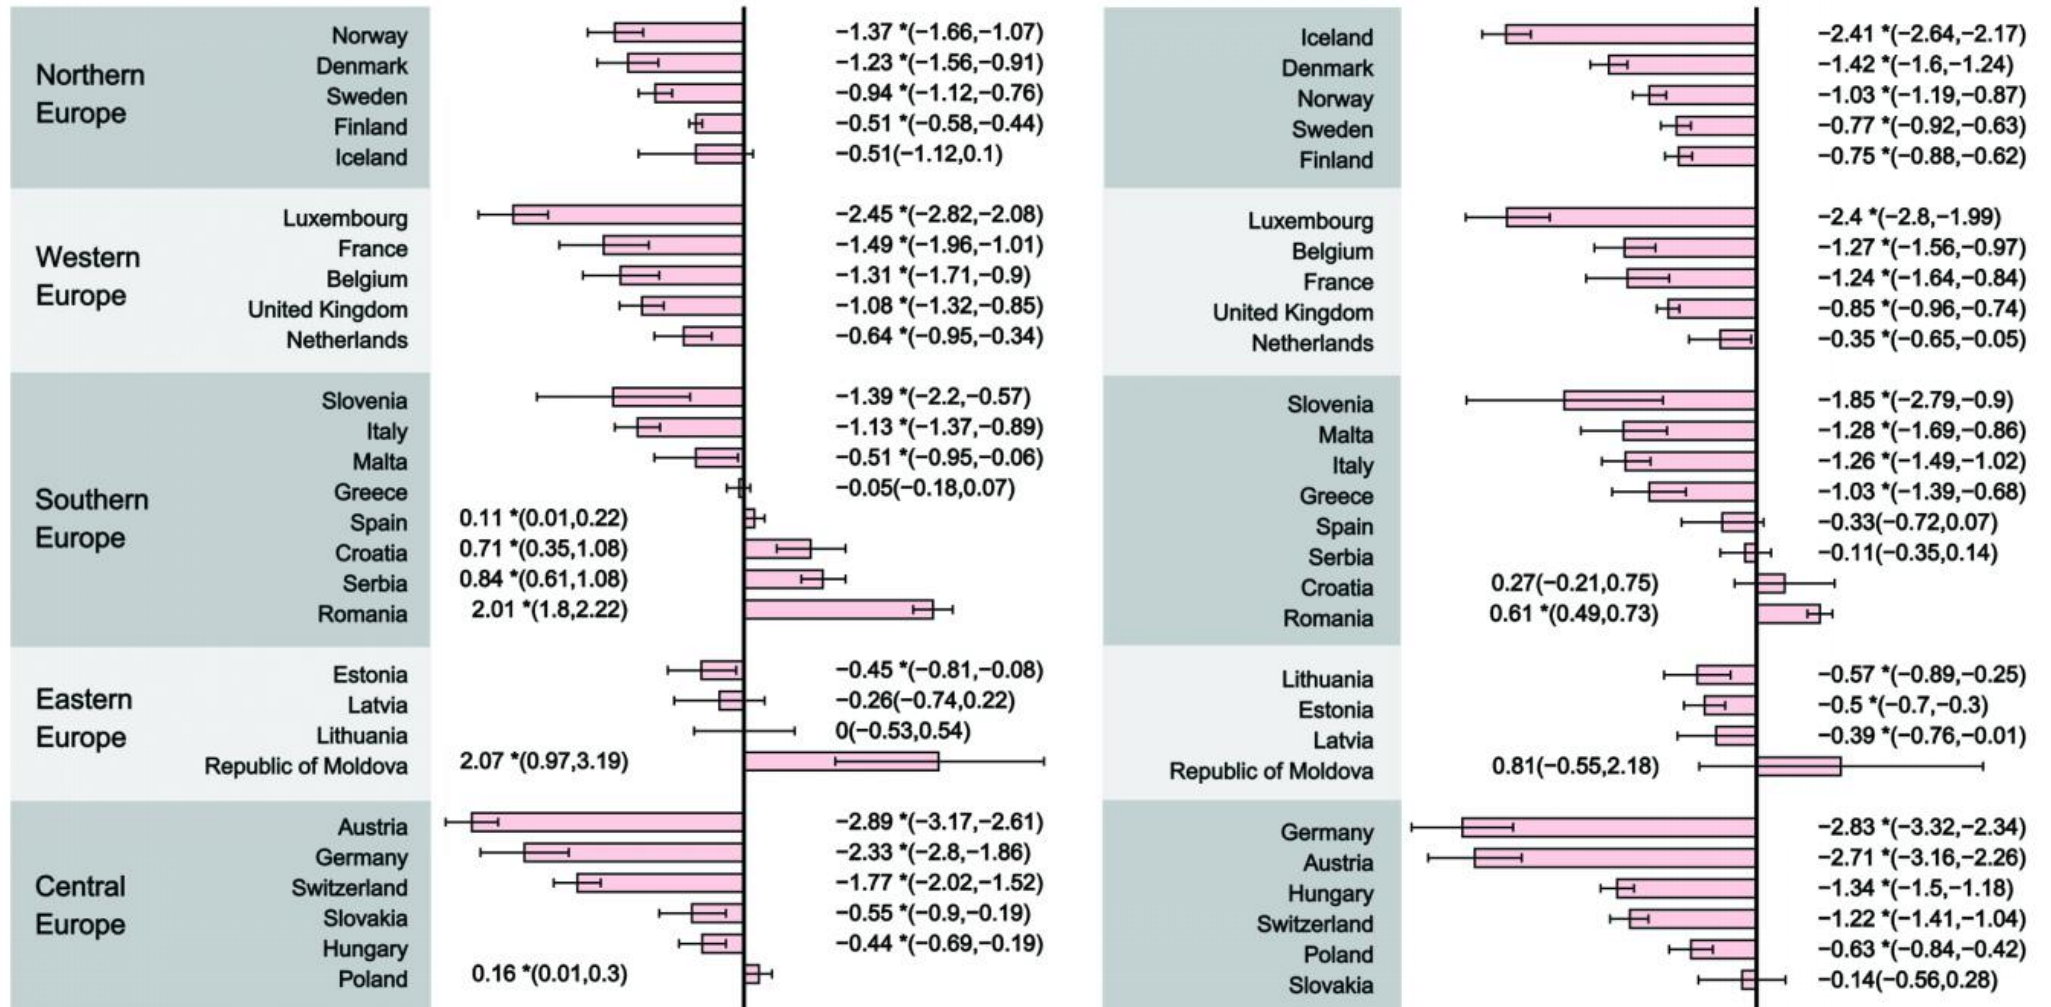

Supplementary Figure 2: The AAPC of the mortality of CRC in males (left panel) and females (right panel), all ages. \* $P < 0.050$ . AAPC: Average annual percent change; CRC: Colorectal cancer.

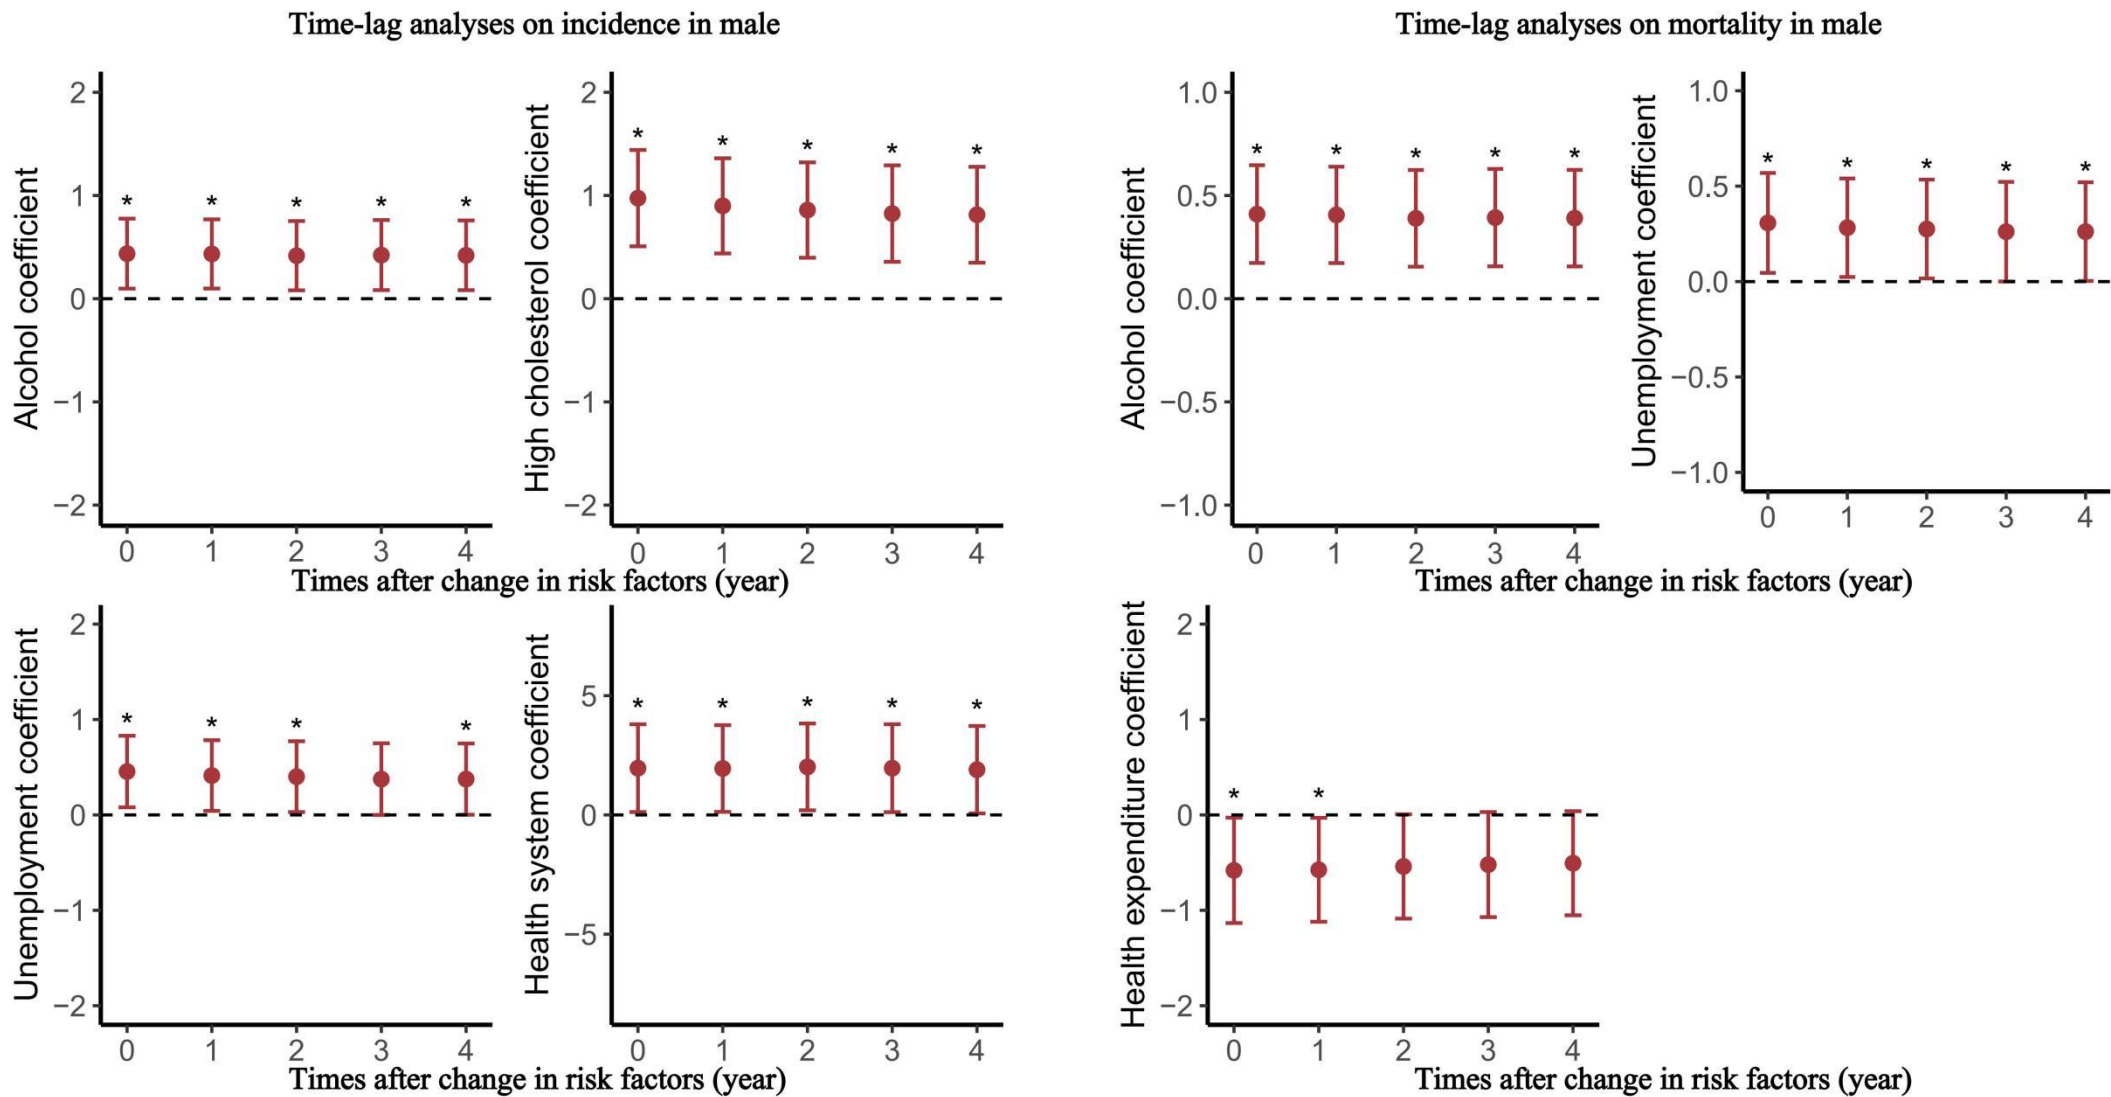

**Supplementary Figure 3: Time-lag analyses of changes in risk factors on CRC incidence and mortality in males.** Alcohol, high cholesterol, unemployment and health system were associated with the ASIR among males. Alcohol and unemployment were associated with the ASMR among males. \* $P < 0.050$ . CRC: Colorectal cancer.

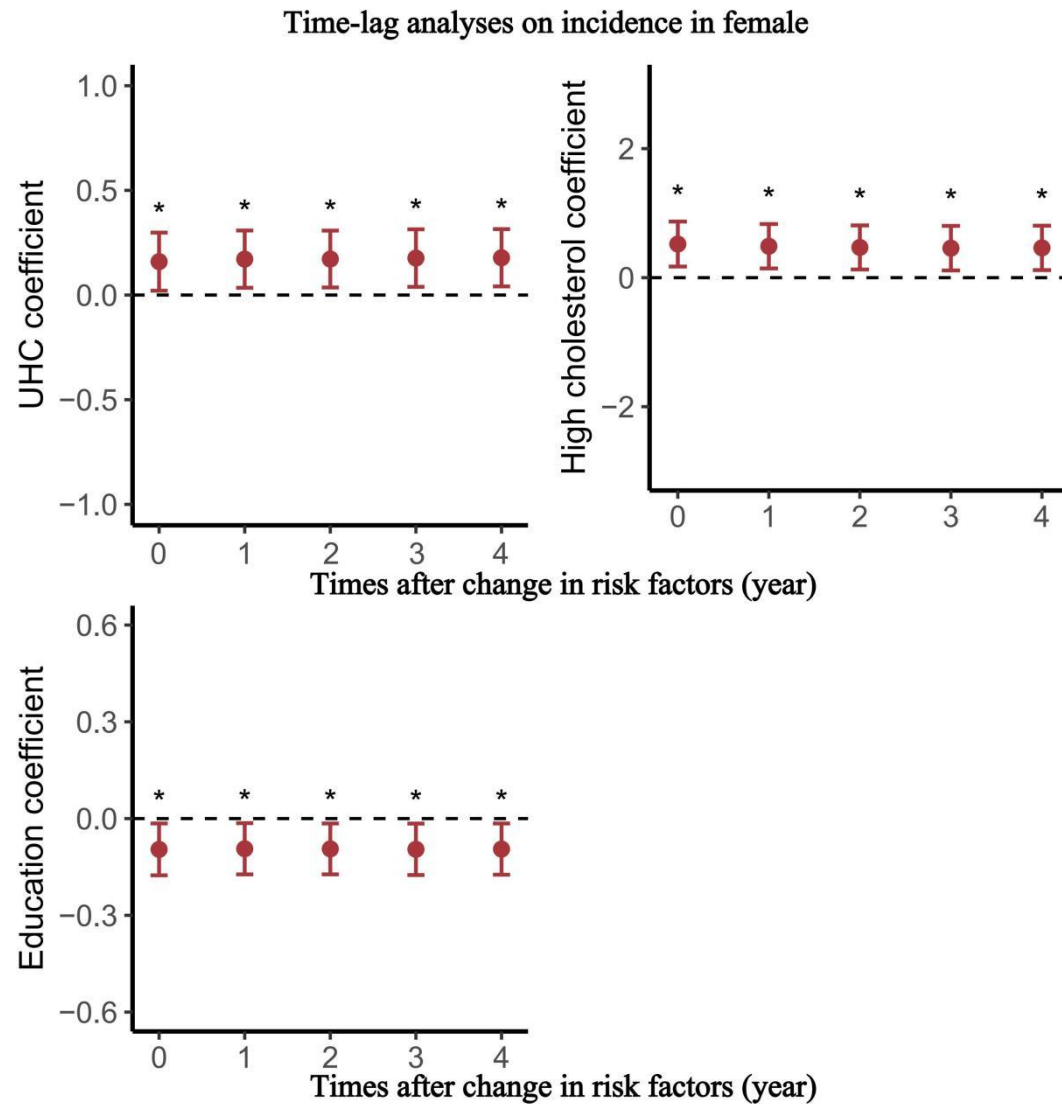

**Supplementary Figure 4: Time-lag analyses of changes in associated factors for CRC incidence in females.** Level of UHC, high cholesterol and education were associated with the ASIR among females. \* $P < 0.050$ . CRC: Colorectal cancer.
